# Supplementary material
Source: HighWire-hosted journal article supplement (https://bmjopen.bmj.com/content/9/3/e017995)

## Search Strategy

We searched for relevant research articles published between January 1990 to June 2018 in the following data sources: MEDLINE via PUBMED, EMBASE, and the COCHRANE library using the following search terms: (Bifidobacter\$ OR Lactobacil\$ OR Lactococcus OR Leuconostoc OR Oenococcus OR Pediococcus OR Propionibacter\$ OR Streptococcus OR probiotics OR "fermented milk") AND ("trial" OR "controlled study" OR "clinical study" OR "blinded study" OR randomised OR randomized OR crossover NOT cohort) AND ("obes\$ OR diabet\$ OR weight OR "metabolic syndrome" OR "glucose intolerant" OR "glucose tolerant" OR "glucose tolerance" OR "glucose intolerance" OR "insulin resistance" OR "insulin sensitivity" OR "impaired fasting glucose" OR "waist circumference" OR "abdominal adiposity" OR "abdominal obesity" OR "central obesity" OR "visceral adipose tissue" OR "visceral fat" OR "visceral adiposity" OR fat OR "fatty liver" OR "non-alcoholic fatty liver") NOT (hypercholesterolemic OR hypercholesterolemia) NOT [(child OR children OR infants) AND (age < 3 years)] NOT (neonates OR new-borns OR newborns) NOT rabbits NOT mouse NOT rats NOT pigeons NOT salmon NOT piglet NOT pig NOT beef NOT cattle NOT donkeys NOT sheep NOT chickens NOT hamsters NOT bass NOT fish NOT dogs NOT cats. Articles only published in English, French, German, Spanish or Portuguese language were considered. Then the reference list of the identified papers was searched.

## Data extraction

In Ekhlesi et al<sup>1</sup>, we did not extract BW and HOMA-IR since changes in these parameters were not coherent with changes in BMI, INS and FG. We considered the study population type 2 diabetes with > 70% of subjects on prescribed drugs for diabetes.<sup>2</sup> In patients with diabetic foot ulcer we did not extract CRP assuming the level does not reflect the low grade inflammation<sup>3</sup>. We clustered strains at the species level with two exceptions: 1) when all the strains were belonging to the same subspecies (i.e. *Streptococcus* subsp. *thermophilus*, and *Bifidobacterium animalis* subsp. *lactis*) and 2) when clustering *Lactobacillus casei* and *Lactobacillus paracasei* species. Concerning the last two species, their classification was controversial and we clustered them as *L. casei* group. For the mix of strains VSL#3, the former *Bifidobacterium longum* subsp. *infantis* and *Bifidobacterium longum* subsp. *longum* were reclassified both as *B. lactis* and *L. delbrueckii* subsp. *bulgaricus* was reclassified as *Lactobacillus helveticus*<sup>4</sup>. When correctly classified, *L. sporogenes* is a *Bacillus coagulans* and therefore, sensitivity analysis excluding this strain was performed. We presented species according to the phylogenetic tree based on the 16S gene sequences.<sup>5,6</sup>

The review team contacted the author of the original publication, the sourcing company or resolved uncertainty by a consensus. When it is not clearly specified (ex: each probiotic capsule contained 5 billion of 5 bacterial strains), we assumed that the amount is related to the total amount of bacteria and not for each strain. For Akbari et al<sup>7</sup>, according to the capsule used in Kouchaki et al<sup>8</sup>, and Mohseni et al<sup>3</sup>, knowing that the mix of strains, the count and the company providing the mix were identical, that the milk was not qualified as fermented milk, and according to references given in the article, we assumed that a capsule was poured in the milk. We assumed that 2.10<sup>9</sup>CFU/g was related to the capsule and not to the milk. Asgharian et al<sup>9</sup>, the product Familact is clearly described in Karbaschian et al<sup>10</sup> and we considered the amount of bacteria described in this publication. For Firouzi et al<sup>11</sup>, the bacteria amount given was not coherent: "Each sachet provided a 3 × 10<sup>10</sup> dose of six viable microbial cell preparation strains... The daily dose of each strain was 10<sup>10</sup> CFUs". We considered the amount given in the publication of Firouzi et al<sup>12</sup>, i.e. 6.10<sup>10</sup> CFU. For Karbaschian et al<sup>10</sup>, the weight of the Familact's capsule is given on the website of the company (<http://zisttakhmir.com/product/Familact/lang/2>) and in Asgharian et al<sup>9</sup> 500mg. For Madj et al<sup>13</sup>, the amount of probiotic was low for a fermented milk, 10<sup>7</sup> in 200ml which was equivalent to 4.10<sup>4</sup> CFU/mL. However, the 10<sup>7</sup> CFU/ml seems coherent with amount normally used for probiotic effect and we considered this amount. In cases of multiple interventions at different doses of probiotics, the highest dose was compared with the control<sup>14,15</sup>. In Sadrzadeh et al<sup>16</sup>, the amount of *L. acidophilus* LA5 and *B. lactis* BB12 was 3.9x10<sup>7</sup> CFU/g. According to the amount of *S. thermophilus* and *L. bulgaricus* of 10<sup>6</sup>-10<sup>7</sup> CFU in this paper, we assumed that the amounts of bacteria were given in CFU/g.

## References

1. Ekhlesi G, Kolahehdouz Mohammadi R, Agah S, et al. Do symbiotic and Vitamin E supplementation have favorable effects in nonalcoholic fatty liver disease? A randomized, double-blind, placebo-controlled trial. *J Res Med Sci* 2016;**21**:106.
2. Minami J, Kondo S, Yanagisawa N, et al. Oral administration of *Bifidobacterium breve* B-3 modifies metabolic functions in adults with obese tendencies in a randomized controlled trial. *Journal of nutritional science* 2015;**4**:e17.
3. Mohseni S, Bayani M, Bahmani F, et al. The beneficial effects of probiotic administration on wound healing and metabolic status in patients with diabetic foot ulcer: A randomized, double-blind, placebo-controlled trial. *Diabetes Metab Res Rev* 2018;**34**(3).
4. Douillard FP, Mora D, Eijlander RT, et al. Comparative genomic analysis of the multispecies probiotic-marketed product VSL#3. *PLoS One* 2018;**13**(2):e0192452.
5. Bull M, Plummer S, Marchesi J, et al. The life history of *Lactobacillus acidophilus* as a probiotic: a tale of revisionary taxonomy, misidentification and commercial success. *FEMS Microbiol Lett* 2013;**349**(2):77-87.
6. Sun Z, Zhang W, Guo C, et al. Comparative genomic analysis of 45 type strains of the genus *Bifidobacterium*: a snapshot of its genetic diversity and evolution. *PLoS One* 2015;**10**(2):e0117912.
7. Akbari E, Asemi Z, Daneshvar Kakhaki R, et al. Effect of Probiotic Supplementation on Cognitive Function and Metabolic Status in Alzheimer's Disease: A Randomized, Double-Blind and Controlled Trial. *Front Aging Neurosci* 2016;**8**:256.
8. Kouchaki E, Tamtaji OR, Salami M, et al. Clinical and metabolic response to probiotic supplementation in patients with multiple sclerosis: A randomized, double-blind, placebo-controlled trial. *Clinical nutrition (Edinburgh, Scotland)* 2017;**36**(5):1245-49.
9. Asgharian A, Askari G, Esmailzade A, et al. The Effect of Symbiotic Supplementation on Liver Enzymes, C-reactive Protein and Ultrasound Findings in Patients with Non-alcoholic Fatty Liver Disease: A Clinical Trial. *International journal of preventive medicine* 2016;**7**:59.
10. Karbaschian Z, Mokhtari Z, Pazouki A, et al. Probiotic Supplementation in Morbid Obese Patients Undergoing One Anastomosis Gastric Bypass-Mini Gastric Bypass (OAGB-MGB) Surgery: a Randomized, Double-Blind, Placebo-Controlled, Clinical Trial. *Obesity surgery* 2018.
11. Firouzi S, Majid HA, Ismail A, et al. Effect of multi-strain probiotics (multi-strain microbial cell preparation) on glycemic control and other diabetes-related outcomes in people with type 2 diabetes: a randomized controlled trial. *Eur J Nutr* 2016.
12. Firouzi S, Mohd-Yusof B-N, Majid H-A, et al. Effect of microbial cell preparation on renal profile and liver function among type 2 diabetics: a randomized controlled trial. *BMC complementary and alternative medicine* 2015;**15**:433.
13. Madjd A, Taylor MA, Mousavi N, et al. Comparison of the effect of daily consumption of probiotic compared with low-fat conventional yogurt on weight loss in healthy obese women following an energy-restricted diet: a randomized controlled trial. *The American journal of clinical nutrition* 2016;**103**(2):323-29.
14. Kadooka Y, Sato M, Ogawa A, et al. Effect of *Lactobacillus gasseri* SBT2055 in fermented milk on abdominal adiposity in adults in a randomized controlled trial. *The British journal of nutrition* 2013;**110**(9):1696-703.
15. Mobini R, Tremaroli V, Ståhlman M, et al. Metabolic effects of *Lactobacillus reuteri* DSM 17938 in Patients with Type 2 Diabetes: A Randomized Controlled Trial. *Diabetes, obesity & metabolism* 2016.
16. Sadrzadeh-Yeganeh H, Elmadfa I, Djazayeri A, et al. The effects of probiotic and conventional yoghurt on lipid profile in women. *The British journal of nutrition* 2010;**103**(12):1778-83.

## Supplementary Tables

**Supplementary Table 1: Characteristics of included randomized controlled trials of probiotics: anthropometric variables and BMI.**

| Study                   | Population        | Country     | Probiotics                                                                                                                                                                                                                                                    | Daily dose (cfu) | Trial length (week) | n   |     | Mean age |       | Gender |       | Mean BW (kg) |      | Mean BMI (kg/m <sup>2</sup> ) |      | Mean WC (cm) |       | Mean BFM (kg) |      |
|-------------------------|-------------------|-------------|---------------------------------------------------------------------------------------------------------------------------------------------------------------------------------------------------------------------------------------------------------------|------------------|---------------------|-----|-----|----------|-------|--------|-------|--------------|------|-------------------------------|------|--------------|-------|---------------|------|
|                         |                   |             |                                                                                                                                                                                                                                                               |                  |                     | INT | CTL | INT      | CTL   | INT    | CTL   | INT          | CTL  | INT                           | CTL  | INT          | CTL   |               |      |
| Agerholm-Larsen (2000)  | OW, OB            | Denmark     | <i>S. ther.</i> , <i>L. acid.</i>                                                                                                                                                                                                                             | 5,4E+10          | 8                   | 16  | 14  | 38,6     | 39,4  | 12/4   | 9/5   | 85,9         | 87,9 | 30,0                          | 30,0 | -            | -     | 32,2          | 32,6 |
| Agerholm-Larsen (2000)  | OW, OB            | Denmark     | <i>S. ther.</i> , <i>L. rham.</i>                                                                                                                                                                                                                             | 4,5E+11          | 8                   | 14  | 14  | 37,9     | 28,7  | 10/4   | 9/5   | 90,5         | 87,9 | 30,2                          | 30,0 | -            | -     | 33,6          | 32,6 |
| Ahmadi (2016)           | GDM               | Iran        | <i>B. bif.</i> , <i>L. acid.</i> , <i>L. cas. gr.</i>                                                                                                                                                                                                         | 6,0E+09          | 6                   | 35  | 35  | 28,5     | 28,7  | 0/35   | 0/35  | 77,7         | 74,9 | 28,7                          | 28,4 | -            | -     | -             | -    |
| Ahn (2015)              | HTG               | South Korea | <i>L. cur.</i> , <i>L. plan.</i>                                                                                                                                                                                                                              | 1,0E+10          | 12                  | 46  | 46  | 54,1     | 52,7  | 15/31  | 15/31 | -            | -    | 24,7                          | 24,9 | -            | -     | -             | -    |
| Aihara (2005)           | High-normal BP    | Japan       | <i>L. hel.</i>                                                                                                                                                                                                                                                | -                | 4                   | 20  | 20  | 49,9     | 52,8  | 13/7   | 13/7  | -            | -    | 24,1                          | 24,3 | -            | -     | -             | -    |
| Aihara (2005)           | mild HT           | Japan       | <i>L. hel.</i>                                                                                                                                                                                                                                                | -                | 4                   | 20  | 20  | 51,9     | 51,5  | 16/4   | 16/4  | -            | -    | 24,9                          | 25,1 | -            | -     | -             | -    |
| Akbari (2016)           | AD                | Iran        | <i>B. bif.</i> , <i>L. acid.</i> , <i>L. cas. gr.</i><br><i>L. fer.</i>                                                                                                                                                                                       | 6,0E+09          | 12                  | 30  | 30  | 82       | 78    | 6/24   | 6/24  | 59,0         | 56,6 | 23,8                          | 22,7 | -            | -     | -             | -    |
| Akkasheh (2016)         | MDD               | Iran        | <i>B. bif.</i> , <i>L. acid.</i> , <i>L. cas. gr.</i>                                                                                                                                                                                                         | 6,0E+09          | 8                   | 20  | 20  | 38,3     | 36,2  | 3/17   | 3/17  | 72,6         | 68,0 | 27,6                          | 26,3 | -            | -     | -             | -    |
| Alisi (2014)            | OB, NASH children | Italy       | <i>B. brev.</i> , <i>B. lac.</i> , <i>L. acid.</i><br><i>S. ther.</i> , <i>L. helv.</i> , <i>L. cas. gr.</i> ,<br><i>L. plan.</i>                                                                                                                             | 1,1E+12          | 17                  | 22  | 22  | 11       | 10    | 10/12  | 14/8  | -            | -    | 27,1                          | 25,6 | -            | -     | -             | -    |
| Aller (2011)            | NAFLD             | Spain       | <i>S. ther.</i> , <i>L. del.</i>                                                                                                                                                                                                                              | 5,0E+08          | 13                  | 14  | 14  | 49,4     | 44,3  | 10/4   | 10/4  | 85,3         | 88,8 | 30,2                          | 29,5 | -            | -     | 40,2          | 37,7 |
| Andreasen (2010)        | T2DM, IGT, NGT    | Denmark     | <i>L. acid.</i>                                                                                                                                                                                                                                               | 1,0E+10          | 4                   | 21  | 24  | 55       | 60    | 21/0   | 24/0  | -            | -    | -                             | -    | -            | -     | -             | -    |
| Asemi (1) (2014)        | T2DM              | Iran        | <i>L. spor.</i>                                                                                                                                                                                                                                               | 2.7E+08          | 6                   | 62  | 62  | 35-70    | 35-70 | 19/43  | 19/43 | 74,9         | 75,4 | 29,6                          | 29,9 | -            | -     | -             | -    |
| Asemi (2) (2013)        | Pregnant          | Iran        | <i>B. lac.</i> , <i>L. acid.</i>                                                                                                                                                                                                                              | -                | 9                   | 37  | 33  | 24,2     | 25,7  | 0/37   | 0/33  | -            | -    | -                             | -    | -            | -     | -             | -    |
| Asemi (3) (2013)        | T2DM              | Iran        | <i>L. acid.</i> , <i>L. rham.</i> , <i>L. cas. gr.</i><br><i>B. brev.</i> , <i>B. lon.</i> , <i>S. ther.</i> , <i>L. del.</i><br><i>B. brev.</i> , <i>B. lon.</i> , <i>S. ther.</i> , <i>L. acid.</i> , <i>L. del.</i> , <i>L. rham.</i> , <i>L. cas. gr.</i> | 3,9E+10          | 8                   | 27  | 27  | 50,5     | 52,6  | 9/21   | 9/21  | 73,5         | 73,0 | 31,6                          | 30,2 | -            | -     | -             | -    |
| Asgharian (2016 & 2017) | NAFLD             | Iran        | <i>B. brev.</i> , <i>B. lon.</i> , <i>S. ther.</i> , <i>L. acid.</i> , <i>L. del.</i> , <i>L. rham.</i> , <i>L. cas. gr.</i>                                                                                                                                  | 9,5E+09          | 8                   | 38  | 36  | 46,6     | 47,8  | 7/33   | 12/22 | 74,5         | 73,7 | 29,2                          | 28,0 | 90,1         | 88,8  | 26,6          | 24,5 |
| Badehnoosh (2018)       | GDM               | Iran        | <i>B. bif.</i> , <i>L. acid.</i> , <i>L. cas. gr.</i>                                                                                                                                                                                                         | 6,0E+09          | 6                   | 30  | 30  | 28,8     | 27,8  | 0/30   | 0/30  | 74,2         | 74,5 | 28,3                          | 28,4 | -            | -     | -             | -    |
| Bahmani (2015)          | T2DM              | Iran        | <i>L. spor.</i>                                                                                                                                                                                                                                               | 1,2E+10          | 8                   | 27  | 27  | 52,0     | 53,4  | -      | 15/66 | 75,1         | 76,8 | 29,8                          | 30,5 | -            | -     | -             | -    |
| Barreto (2014)          | MetS              | Brazil      | <i>L. plan.</i>                                                                                                                                                                                                                                               | 1,0E+09          | 12                  | 12  | 12  | 62,0     | 63,0  | 0/12   | 0/12  | 66,1         | 67,7 | 27,5                          | 27,5 | 101,0        | 103,5 | -             | -    |

| Study                              | Population          | Country  | Probiotics                                                                                                                    | Daily dose (cfu) | Trial length (week) | n   |     | Mean age |       | Gender |       | Mean BW (kg) |      | Mean BMI (kg/m <sup>2</sup> ) |      | Mean WC (cm) |       | Mean BFM (kg) |      |
|------------------------------------|---------------------|----------|-------------------------------------------------------------------------------------------------------------------------------|------------------|---------------------|-----|-----|----------|-------|--------|-------|--------------|------|-------------------------------|------|--------------|-------|---------------|------|
|                                    |                     |          |                                                                                                                               |                  |                     | INT | CTL | INT      | CTL   | INT    | CTL   | INT          | CTL  | INT                           | CTL  | INT          | CTL   | INT           | CTL  |
| Behrouz (2017)                     | NAFLD               | Iran     | <i>B. brev.</i> , <i>B. lon.</i> , <i>L. acid.</i> , <i>L. rham.</i> , <i>L. cas. gr.</i>                                     | 1,0E+10          | 12                  | 30  | 30  | 38,5     | 38,4  | 22/8   | 21/9  | 85,0         | 90,7 | 29,6                          | 31,9 | -            | -     | 25,7          | 29,3 |
| Bernini (2015)                     | MetS                | Brazil   | <i>B. lac.</i>                                                                                                                | 2,7E+10          | 6                   | 26  | 25  | -        | 58,5  | -      | -     | -            | -    | 30,8                          | 35,8 | 105,0        | 107,0 | -             | -    |
| Brahe (2015)                       | OB                  | Denmark  | <i>L. cas. gr.</i>                                                                                                            | 9,4E+10          | 6                   | 18  | 16  | 61,4     | -     | 0/18   | 0/16  | -            | -    | 34,2                          | 34,3 | -            | -     | -             | -    |
| Burton (T1) (2017)                 | Healthy             | UK       | <i>S. ther.</i> , <i>L. del.</i> , <i>L. rham.</i>                                                                            | 3,0E+11          | 2                   | 6   | 6   | -        | -     | 6/0    | 6/0   | -            | -    | -                             | -    | -            | -     | -             | -    |
| Burton (T2) (2017)                 | Healthy             | UK       | <i>S. ther.</i> , <i>L. del.</i> , <i>L. rham.</i>                                                                            | 3,0E+11          | 2                   | 6   | 6   | 24,0     | -     | 6/0    | 6/0   | -            | -    | -                             | -    | -            | -     | -             | -    |
| Chung (2016)                       | OB                  | Korea    | <i>L. reut.</i>                                                                                                               | 1,0E+09          | 12                  | 20  | 20  | 39,4     | 42,1  | 7/11   | 13/6  | 79,6         | 80,1 | 29,0                          | 27,9 | -            | -     | -             | -    |
| De Roos (1999)                     | Healthy             | NL       | <i>L. acid.</i>                                                                                                               | 2,7E+10          | 2                   | 39  | 39  | 39,8     | 39,9  | 11/28  | 11/28 | -            | -    | 23,9                          | 24,2 | -            | -     | -             | -    |
| Dolatkhah (2015 & Hajifaraji 2018) | GDM                 | Iran     | <i>B. lac.</i> , <i>S. ther.</i> , <i>L. acid.</i><br><i>L. del.</i>                                                          | 4,0E+09          | 8                   | 27  | 29  | 28,1     | 26,5  | 0/27   | 0/29  | 83,3         | 78,6 | -                             | -    | -            | -     | -             | -    |
| Ebrahimi (2017)                    | T2DM                | Iran     | <i>B. brev.</i> , <i>B. lon.</i> , <i>S. ther.</i> , <i>L. acid.</i> , <i>L. del.</i> , <i>L. rham.</i> , <i>L. cas. gr.</i>  | -                | 9                   | 35  | 35  | 58,7     | 58,6  | 23/12  | 19/16 | 77,6         | 74,6 | 28,1                          | 27,3 | -            | -     | -             | -    |
| Ejtahed (2012)                     | T2DM                | Iran     | <i>B. lac.</i> , <i>L. acid.</i>                                                                                              | 4,0E+09          | 6                   | 30  | 30  | 50,9     | 51,0  | 11/19  | 12/18 | -            | -    | 29,0                          | 29,1 | -            | -     | -             | -    |
| Ekhlas (2016)                      | NAFLD               | Iran     | <i>B. brev.</i> , <i>B. lon.</i> , <i>S. ther.</i> , <i>L. acid.</i> , <i>L. del.</i> , <i>L. rham.</i> , <i>L. cas. gr.</i>  | 2,8E+09          | 8                   | 15  | 15  | 25-64    | 25-64 | -      | -     | -            | -    | 27,3                          | 27,8 | 93,6         | 96,5  | -             | -    |
| Eslamparast (1) (2014)             | NAFLD               | Iran     | <i>B. brev.</i> , <i>B. long.</i> , <i>S. ther.</i> , <i>L. acid.</i> , <i>L. del.</i> , <i>L. rham.</i> , <i>L. cas. gr.</i> | 4,0E+08          | 28                  | 26  | 26  | 46,4     | 45,7  | 14/12  | 11/15 | -            | -    | 32,1                          | 31,3 | -            | -     | -             | -    |
| Eslamparast (2) (2014)             | MetS                | Iran     | <i>B. brev.</i> , <i>B. long.</i> , <i>S. ther.</i> , <i>L. acid.</i> , <i>L. del.</i> , <i>L. rham.</i> , <i>L. cas. gr.</i> | 4,0E+08          | 28                  | 19  | 19  | 47,5     | 46,1  | -      | -     | -            | -    | 32,1                          | 31,5 | -            | -     | -             | -    |
| Famouri (2017)                     | NAFLD, OB, children | Iran     | <i>B. bif.</i> , <i>B. lac.</i> , <i>L. acid.</i> , <i>L. rham.</i>                                                           | 1,3E+10          | 12                  | 32  | 32  | 12,7     | 12,6  | 16/18  | 18/16 | -            | -    | -                             | -    | 82,2         | 81,4  | -             | -    |
| Feizollahzadeh (2016)              | T2DM                | Iran     | <i>L. plan.</i>                                                                                                               | 2,0E+07          | 8                   | 20  | 20  | 56,9     | 53,6  | 11/9   | 10/10 | -            | -    | 26,7                          | 26,6 | -            | -     | -             | -    |
| Firouzi (2015 & 2016)              | T2DM                | Malaysia | <i>B. bif.</i> , <i>B. lac.</i> , <i>B. lon.</i> , <i>Lc. lac.</i> , <i>L. acid.</i> , <i>L. cas. gr.</i>                     | 6,0E+10          | 12                  | 48  | 53  | 54,2     | 52,9  | -      | -     | 75,3         | 74,2 | 29,5                          | 28,4 | -            | -     | -             | -    |
| Firouzi (2015 & 2016)*             | T2DM, M             | Malaysia | <i>B. bif.</i> , <i>B. lac.</i> , <i>B. lon.</i> , <i>Lc. lac.</i> , <i>L. acid.</i> , <i>L. cas. gr.</i>                     | 6,0E+10          | 12                  | 26  | 28  | -        | -     | -      | -     | -            | -    | -                             | -    | 100,0        | 98,0  | -             | -    |
| Firouzi (2015 & 2016)*             | T2DM, F             | Malaysia | <i>B. bif.</i> , <i>B. lac.</i> , <i>B. lon.</i> , <i>Lc. lac.</i> , <i>L. acid.</i> , <i>L. cas. gr.</i>                     | 6,0E+10          | 12                  | 21  | 26  | -        | -     | -      | -     | -            | -    | -                             | -    | 100,0        | 95,0  | -             | -    |
| Goebel (2012)                      | OB, MetS, children  | Denmark  | <i>L. sal.</i>                                                                                                                | 1,0E+10          | 12                  | 50  | 50  | 12,9     | 13,4  | 11/16  | 11/12 | 79,9         | 84,5 | 30,9                          | 30,9 | 100,8        | 103,6 | 26,5          | 28,7 |

| Study                  | Population        | Country   | Probiotics                                                                                                                   | Daily dose (cfu) | Trial length (week) | n   |     | Mean age |       | Gender |       | Mean BW (kg) |      | Mean BMI (kg/m <sup>2</sup> ) |      | Mean WC (cm) |       | Mean BFM (kg) |      |
|------------------------|-------------------|-----------|------------------------------------------------------------------------------------------------------------------------------|------------------|---------------------|-----|-----|----------|-------|--------|-------|--------------|------|-------------------------------|------|--------------|-------|---------------|------|
|                        |                   |           |                                                                                                                              |                  |                     | INT | CTL | INT      | CTL   | INT    | CTL   | INT          | CTL  | INT                           | CTL  | INT          | CTL   | INT           | CTL  |
| Gomes (2017)           | OW, OB            | Brazil    | <i>B. bif.</i> , <i>B. lac.</i> , <i>Lc. lac.</i> , <i>L. acid.</i> , <i>L. cas. gr.</i>                                     | 2,0E+10          | 8                   | 22  | 21  | 20-59    | 20-59 | 0/21   | 0/22  | 76,6         | 83,6 | 31,7                          | 33,3 | 94,0         | 97,5  | 36,3          | 39,7 |
| Hariri (2015)          | T2DM              | Iran      | <i>L. plan.</i>                                                                                                              | 2,0E+07          | 8                   | 20  | 20  | 56,9     | 53,6  | 11/9   | 10/10 | 70,8         | 71,6 | 26,7                          | 26,6 | -            | -     | -             | -    |
| Higashikawa (2016)     | OW                | Japan     | <i>P. pen.</i>                                                                                                               | 1,0E+11          | 12                  | 21  | 20  | 52,5     | 52,8  | 8/13   | 7/13  | -            | -    | 26,8                          | 27,4 | 94,7         | 94,8  | 23,3          | 23,8 |
| Higashikawa T1 (2010)  | Healthy           | Japan     | <i>L. plan.</i>                                                                                                              | 2,0E+10          | 6                   | 23  | 21  | 37,3     | 33,0  | 6/18   | 6/16  | -            | -    | 22,5                          | 21,2 | -            | -     | -             | -    |
| Higashikawa T2 (2010)  | Healthy           | Japan     | <i>L. plan.</i>                                                                                                              | 2,0E+10          | 6                   | 22  | 21  | 35,0     | 35,2  | 7/15   | 6/16  | -            | -    | 21,4                          | 21,2 | -            | -     | -             | -    |
| Hove (2015)            | T2DM              | Denmark   | <i>L. hel.</i>                                                                                                               | -                | 12                  | 23  | 18  | 58,5     | 60,6  | 23/0   | 18/0  | 93,2         | 85,2 | 29,2                          | 27,7 | 101,3        | 100,3 | -             | -    |
| Hulston (2015)         | Healthy           | UK        | <i>L. cas. gr.</i>                                                                                                           | 6,5E+09          | 4                   | 8   | 9   | 25,0     | 24,2  | 7/1    | 7/2   | 73,4         | 72,1 | 23,5                          | 24,2 | -            | -     | -             | -    |
| Hutt T1 (2014)         | Healthy           | Estonia   | <i>L. plan.</i>                                                                                                              | 1,0E+10          | 3                   | 82  | 82  | 37,7     | 37,7  | 33/49  | 33/49 | -            | -    | 25,4                          | 25,4 | -            | -     | -             | -    |
| Hutt T2 (2014)         | Healthy           | Estonia   | <i>L. plan.</i>                                                                                                              | 6,0E+09          | 3                   | 43  | 43  | 34,2     | 34,2  | 11/32  | 11/32 | -            | -    | 23,8                          | 23,8 | -            | -     | -             | -    |
| Ibrahim T1 (2018)      | Healthy           | Malaysia  | <i>B. bif.</i> , <i>B. inf.</i> , <i>B. lon.</i> , <i>Lc. lac.</i> , <i>L. acid.</i> , <i>L. cas. gr.</i>                    | 6,0E+10          | 12                  | 10  | 10  | 23,0     | 22,0  | 10/0   | 10/0  | 63,0         | 61,4 | 21,8                          | 21,1 | -            | -     | 12,9          | 11,4 |
| Ibrahim T2 (2018)      | Healthy, training | Malaysia  | <i>B. bif.</i> , <i>B. inf.</i> , <i>B. lon.</i> , <i>Lc. lac.</i> , <i>L. acid.</i> , <i>L. cas. gr.</i>                    | 6,0E+10          | 12                  | 9   | 12  | 22,3     | 21,0  | 9/0    | 12/0  | 64,1         | 60,6 | 22,1                          | 21,1 | -            | -     | 13,5          | 11,2 |
| Ilmonen (2011)         | Pregnant          | Finland   | <i>B. lac.</i> , <i>L. rham.</i>                                                                                             | 2,0E+10          | -6                  | 85  | 86  | 29,7     | 30,1  | 0/85   | 0/86  | -            | -    | -                             | -    | -            | -     | -             | -    |
| Inoue (2003)           | Mild HT           | Japan     | <i>B. lac.</i> , <i>L. cas. gr.</i>                                                                                          | -                | 12                  | 18  | 17  | 56,2     | 53,9  | 10/8   | 10/7  | -            | -    | 23,8                          | 25,7 | -            | -     | -             | -    |
| Ivey T1 (2014)         | OW                | Australia | <i>B. lac.</i> , <i>L. acid.</i>                                                                                             | 3,0E+09          | 6                   | 37  | 40  | 68,4     | 65,4  | 25/12  | 23/17 | -            | -    | 30,2                          | 30,8 | -            | -     | -             | -    |
| Ivey T2 (2014)         | OW                | Australia | <i>B. lac.</i> , <i>L. acid.</i>                                                                                             | 6,0E+09          | 6                   | 40  | 40  | 68,4     | 65,4  | 25/15  |       | -            | -    | 30,6                          | 30,8 | -            | -     | -             | -    |
| Ivey T3 (2014)         | OW                | Australia | <i>B. lac.</i> , <i>L. acid.</i>                                                                                             | 3,0E+09          | 6                   | 39  | 40  | 64,7     | 65,4  | 23/16  |       | -            | -    | 30,8                          | 30,8 | -            | -     | -             | -    |
| Jafarnejad (2016)      | GDM               | Iran      | <i>B. brev.</i> , <i>B. lac.</i> , <i>S. ther.</i> , <i>L. hel.</i> , <i>L. acid.</i> , <i>L. cas. gr.</i> , <i>L. plan.</i> | 1,1E+11          | 8                   | 37  | 35  | 32,4     | 31,9  | 0/37   | 0/35  | 73,2         | 73,5 | -                             | -    | -            | -     | -             | -    |
| Jamilian (2016)        | Pregnant          | Iran      | <i>B. bif.</i> , <i>L. acid.</i> , <i>L. cas. gr.</i>                                                                        | 6,0E+09          | 12                  | 30  | 30  | 27,1     | 28,4  | 0/30   | 0/30  | 68,4         | 68,1 | 25,6                          | 25,5 | -            | -     | -             | -    |
| Javadi (2017)          | NAFLD             | Iran      | <i>B. lon.</i> , <i>L. acid.</i>                                                                                             | 2,0E+07          | 13                  | 17  | 19  | 43,2     | 38,7  | 14/3   | 16/3  | 89,9         | 88,5 | 32,3                          | 31,0 | -            | -     | -             | -    |
| Jones (2018)           | OB, children      | USA       | <i>B. brev.</i> , <i>B. lac.</i> , <i>S. ther.</i> , <i>L. hel.</i> , <i>L. acid.</i> , <i>L. cas. gr.</i> , <i>L. plan.</i> | 1,4E+13          | 16                  | 8   | 11  | 14,4     | 14,9  | 3/6    | 5/6   | -            | -    | 30,7                          | 34,5 | 96,9         | 104,6 | 33,3          | 37,3 |
| Jung (2013)            | OW, OB            | Korea     | <i>L. gas.</i>                                                                                                               | 6,0E+10          | 12                  | 31  | 31  | 20-50    | 20-50 | 13/15  | 5/20  | 77,2         | 77,4 | 28,6                          | 29,6 | 95,5         | 96,4  | 27,6          | 27,6 |
| Jung (2015 & Kim 2017) | OW                | Korea     | <i>L. cur.</i> , <i>L. plan.</i>                                                                                             | 1,0E+10          | 12                  | 49  | 46  | 40,1     | 37,8  | 18/31  | 16/30 | 73,5         | 73,5 | 27,0                          | 27,0 | 90,1         | 91,1  | 22,2          | 23,0 |

| Study              | Population        | Country  | Probiotics                                                                   | Daily dose (cfu) | Trial length (week) | n   |     | Mean age |       | Gender |       | Mean BW (kg) |       | Mean BMI (kg/m <sup>2</sup> ) |      | Mean WC (cm) |       | Mean BFM (kg) |      |
|--------------------|-------------------|----------|------------------------------------------------------------------------------|------------------|---------------------|-----|-----|----------|-------|--------|-------|--------------|-------|-------------------------------|------|--------------|-------|---------------|------|
|                    |                   |          |                                                                              |                  |                     | INT | CTL | INT      | CTL   | INT    | CTL   | INT          | CTL   | INT                           | CTL  | INT          | CTL   | INT           | CTL  |
| Kadooka (2013)     | Healthy, VF       | Japan    | <i>L. gas.</i>                                                               | 1,6E+10          | 12                  | 69  | 70  | 46,9     | 47,4  | 33/36  | 36/34 | -            | -     | 27,5                          | 27,2 | 93,9         | 94,6  | 24,0          | 24,2 |
| Kadooka (2010)     | Healthy, VF       | Japan    | <i>L. gas.</i>                                                               | 1,0E+11          | 12                  | 43  | 44  | 48,3     | 49,2  | 29/14  | 30/14 | 76,9         | 77,1  | 27,5                          | 27,2 | 93,0         | 93,9  | 23,5          | 22,9 |
| Karamali (2016)    | GDM               | Iran     | <i>B. bif., L. acid., L. cas. gr.</i>                                        | 6,0E+09          | 6                   | 30  | 30  | 31,8     | 29,7  | 0/60   | -     | 76,5         | 73,0  | 28,6                          | 28,5 | -            | -     | -             | -    |
| Karbaschian (2018) | OB, GB            | Iran     | <i>B. brev., B. lon., S. ther., L. acid., L. del., L. rham., L. cas. gr.</i> | 9,5E+09          | 16                  | 23  | 23  | 32,4     | 37,0  | 0/23   | 0/23  | 120,0        | 119,3 | 44,6                          | 45,0 | 123,9        | 121,1 | -             | -    |
| Khalili (2018)     | T2DM              | Iran     | <i>L. cas. gr.</i>                                                           | 2,0E+09          | 8                   | 20  | 20  | 44,0     | 45,0  | 7/13   | 7/13  | 77,2         | 83,5  | 29,5                          | 31,9 | 97,5         | 102,9 | -             | -    |
| Kijmanawat (2018)  | GDM               | Thailand | <i>B. bif., L. acid.</i>                                                     | 1,0E+09          | 4                   | 29  | 28  | 30,72    | 32,5  | 0/28   | 0/29  | 63,5         | 62,9  | -                             | -    | -            | -     | -             | -    |
| Kouchaki (2016)    | MS                | Iran     | <i>B. bif., L. acid., L. fer., L. cas. gr.</i>                               | 8,0E+09          | 12                  | 30  | 30  | 34,4     | 33,8  | 5/25   | 5/25  | 71,5         | 67,7  | 25,4                          | 24,7 | -            | -     | -             | -    |
| Laitinen (2008)    | Pregnant          | Finland  | <i>B. lact., L. rham.</i>                                                    | 2,0E+10          | up to 84            | 85  | 86  | 29,7     | 30,1  | 0/85   | 0/86  | -            | -     | -                             | -    | -            | -     | -             | -    |
| Lee T1 (2017)      | Healthy           | USA      | <i>B. lact.</i>                                                              | 3,2E+09          | 4                   | 25  | 25  | 27,6     | 29,3  | 11/19  | 11/19 | -            | -     | -                             | -    | -            | -     | -             | -    |
| Lee T2 (2017)      | Healthy           | USA      | <i>B. lact.</i>                                                              | 3,2E+09          | 4                   | 26  | 25  | 27,6     | 29,3  | 11/19  | -     | -            | -     | -                             | -    | -            | -     | -             | -    |
| Lee (2014)         | OW                | Korea    | <i>B. brev., B. lac., B. lon., S. ther., L. acid., L. rham., L. plan.</i>    | 1,0E+10          | 8                   | 17  | 19  | 19-65    | 19-65 | 0/17   | 0/19  | 70,7         | 70,6  | 28,3                          | 28,5 | 94,5         | 95,4  | 27,0          | 27,1 |
| Lindsay (2015)     | GDM, IGT pregnant | Ireland  | <i>L. sal.</i>                                                               | 1,0E+09          | 8                   | 48  | 52  | 33,5     | 32,6  | 0/48   | 0/52  | -            | -     | -                             | -    | -            | -     | -             | -    |
| Lindsay (2014)     | OB, pregnant      | Ireland  | <i>L. sal.</i>                                                               | 1,0E+09          | 4                   | 63  | 75  | 31,4     | 31,0  | 0/63   | 0/75  | -            | -     | -                             | -    | -            | -     | -             | -    |
| Madjd (2016)       | OB                | Iran     | <i>B. lac., S. ther., L. acid., L. del.</i>                                  | 4,0E+09          | 12                  | 44  | 45  | 32,2     | 31,8  | 0/89   | -     | 82,7         | 82,5  | 32,1                          | 32,1 | 101,2        | 101,3 | -             | -    |
| Mahboobi (2014)    | Prediabetes       | Iran     | <i>B. brev., B. lon., S. ther., L. acid., L. del., L. rham., L. cas. gr.</i> | 5,3E+10          | 8                   | 28  | 27  | 51,0     | 50,4  | -      | -     | -            | -     | 28,9                          | 29,7 | -            | -     | -             | -    |
| Manzhali (2017)    | NASH              | Ukraine  | <i>B. lon., S. ther., L. bif., L. del., L. rhamn., L. cas. gr.</i>           | 1,0E+08          | 12                  | 38  | 37  | 44,3     | 43,5  | 11/27  | 16/21 | -            | -     | 26,4                          | 26,6 | -            | -     | -             | -    |
| Mazloom (2013)     | T2DM              | Iran     | <i>L. acid., L. del., L. cas. gr.</i>                                        | -                | 6                   | 16  | 18  | 55,4     | 51,8  | -      | 8/26  | -            | -     | 28,0                          | 27,2 | -            | -     | -             | -    |
| Minami (2015)      | T2DM, OB          | Japan    | <i>B. brev.</i>                                                              | 5,0E+10          | 12                  | 19  | 25  | 58,9     | 61,9  | 6/13   | 11/14 | 68,9         | 71,2  | 27,1                          | 27,7 | -            | -     | 21,5          | 23,5 |
| Miraghajani (2017) | T2DM              | Iran     | <i>L. plan.</i>                                                              | 4,0E+09          | 8                   | 20  | 20  | 56,9     | 53,6  | 24/24  | 10/14 | 70,8         | 71,6  | 26,7                          | 26,6 | -            | -     | -             | -    |
| Mobini (2017)      | T2DM              | Sweden   | <i>L. reut.</i>                                                              | 1,0E+10          | 12                  | 14  | 15  | 64,0     | 65,0  | 11/3   | 11/4  | 101,4        | 93,5  | 32,3                          | 30,7 | 114,0        | 112,0 | 38,2          | 35,0 |
| Mofidi (2017)      | NAFLD             | Iran     | <i>B. brev., B. lon., S. ther., L. acid., L. rham., L. del., L. cas. gr.</i> | 2,8E+09          | 28                  | 21  | 21  | 40,1     | 44,6  | 11/10  | 12/9  | -            | -     | 23,2                          | 23,2 | -            | -     | -             | -    |

| Study                | Population       | Country      | Probiotics                                                                                                                    | Daily dose (cfu) | Trial length (week) | n   |     | Mean age |       | Gender |       | Mean BW (kg) |      | Mean BMI (kg/m <sup>2</sup> ) |      | Mean WC (cm) |       | Mean BFM (kg) |      |
|----------------------|------------------|--------------|-------------------------------------------------------------------------------------------------------------------------------|------------------|---------------------|-----|-----|----------|-------|--------|-------|--------------|------|-------------------------------|------|--------------|-------|---------------|------|
|                      |                  |              |                                                                                                                               |                  |                     | INT | CTL | INT      | CTL   | INT    | CTL   | INT          | CTL  | INT                           | CTL  | INT          | CTL   | INT           | CTL  |
| Mohamadshahi (2014)  | T2DM             | Iran         | <i>B. lac.</i> , <i>L. acid.</i>                                                                                              | 1,1E+09          | 8                   | 20  | 20  | 53,0     | 49,0  | -      | 10/32 | 74,7         | 79,3 | 28,4                          | 29,2 | 101,9        | 107,7 | 27,0          | 29,4 |
| Mohseni (2017)       | T2DM             | Iran         | <i>B. bif.</i> , <i>L. acid.</i> , <i>L. fer.</i> , <i>L. cas. gr.</i>                                                        | 8,0E+09          | 12                  | 30  | 30  | 62,6     | 58,5  | 20/10  | 20/10 | 76,0         | 71,3 | 26,4                          | 25,3 | -            | -     | -             | -    |
| Nabavi (2014 & 2015) | NAFLD            | Iran         | <i>B. lac.</i> , <i>L. acid.</i>                                                                                              | 2,5E+09          | 8                   | 36  | 36  | 42,75    | 44,05 | 17/19  | 18/18 | 84,3         | 86,2 | 30,1                          | 31,4 | 97,4         | 98,4  | -             | -    |
| Naito (2017)         | OB, Prediabetes  | Japan        | <i>L. cas. gr.</i>                                                                                                            | 1,0E+11          | 8                   | 48  | 50  | 47,4     | 47,4  | 48/0   | 50/0  | 86,7         | 83,6 | 29,5                          | 29,0 | -            | -     | 24,3          | 23,1 |
| Naruszewicz (2002)   | Healthy          | Sweden       | <i>L. plan.</i>                                                                                                               | 2,0E+10          | 6                   | 18  | 18  | 42,3     | 41,8  | -      | -     | -            | -    | 24,8                          | 25,8 | -            | -     | -             | -    |
| Odamaki (2016)       | Healthy          | Japan        | <i>B. lon.</i> , <i>S. ther.</i> , <i>L. del.</i>                                                                             | 4,0E+09          | 3                   | 10  | 10  | 39,5     | 40,5  | 3/7    | 3/7   | -            | -    | 21,7                          | 23,3 | -            | -     | -             | -    |
| Ogawa (2014)         | HTG              | Japan        | <i>L. gas.</i>                                                                                                                | 1,0E+11          | 4                   | 20  | 20  | 51,1     | 51,1  | 15/5   | 15/5  | 70,7         | 70,5 | 24,5                          | 24,5 | 85,4         | 87,4  | -             | -    |
| Omar (2013)          | Healthy          | Canada       | <i>L. amyl.</i>                                                                                                               | 1,4E+09          | 6                   | 14  | 14  | 46,3     | 46,3  | 10/18  | 10/18 | 82,7         | 82,7 | -                             | -    | -            | -     | 33,3          | 29,6 |
| Omar (2013)          | Healthy          | Canada       | <i>L. fer.</i>                                                                                                                | 1,1E+09          | 6                   | 14  | 14  | 46,3     | 46,3  | 10/18  | 10/18 | 83,9         | 82,7 | -                             | -    | -            | -     | 36,4          | 29,6 |
| Ostadrhiri (2015)    | T2DM             | Iran         | <i>B. brev.</i> , <i>B. lac.</i> , <i>S. ther.</i> , <i>L. acid.</i> , <i>L. cas. gr.</i>                                     | 2,9E+10          | 8                   | 30  | 30  | 35-65    | 35-65 | 18/12  | 16/14 | 77,5         | 74,9 | 28,9                          | 27,5 | -            | -     | -             | -    |
| Osterberg (2015)     | Healthy          | USA          | <i>B. lac.</i> , <i>L. hel.</i> , <i>L. acid.</i> , <i>L. cas. gr.</i> , <i>L. plan.</i>                                      | 1,1E+12          | 4                   | 9   | 11  | 22,4     | 22,9  | 9/0    | 11/0  | -            | -    | 23,9                          | 23,2 | -            | -     | 16,3          | 13,6 |
| Rajkumar (2015)      | Healthy          | Japan        | <i>L. sal.</i>                                                                                                                | 4,0E+12          | 6                   | 15  | 15  | 20-25    | 20-25 | 6/7    | 6/7   | -            | -    | 22,3                          | 22,7 | -            | -     | -             | -    |
| Rajkumar (2014)      | OW               | India        | <i>B. brev.</i> , <i>B. lac.</i> , <i>S. ther.</i> , <i>L. hel.</i> , <i>L. acid.</i> , <i>L. cas. gr.</i> , <i>L. plan.</i>  | 1,1E+12          | 6                   | 15  | 15  | 49,0     | 49,0  | 8/7    | 8/7   | -            | -    | -                             | -    | -            | -     | -             | -    |
| Sabico (2017)        | T2DM             | Saudi Arabia | <i>B. bif.</i> , <i>L. brev.</i> , <i>B. lac.</i> , <i>Lc. lac.</i> , <i>L. acid.</i> , <i>L. cas. gr.</i> , <i>L. sal.</i>   | 5,0E+09          | 12                  | 39  | 39  | 48,0     | 46,6  | 19/20  | 21/18 | 75,6         | 79,5 | 29,4                          | 30,1 | -            | -     | -             | -    |
| Sadrzadeh (2009)     | OW               | Iran         | <i>B. lac.</i> , <i>L. acid.</i>                                                                                              | 1,2E+10          | 6                   | 30  | 30  | 19-49    | 19-49 | 0/30   | 0/30  | 60,7         | 58,5 | 24,0                          | 23,0 | -            | -     | -             | -    |
| Safavi (2013)        | OW, OB, children | Iran         | <i>B. brev.</i> , <i>B. lon.</i> , <i>S. therm.</i> , <i>L. acid.</i> , <i>L. del.</i> , <i>L. rham.</i> , <i>L. cas. gr.</i> | 2,0E+08          | 56                  | 29  | 27  | 10,8     | 10,9  | -      | -     | -            | -    | 22,2                          | 20,5 | 84,2         | 76,5  | -             | -    |
| Sanchez (2013)       | OB               | Canada       | <i>L. rham.</i>                                                                                                               | 3,2E+08          | 24                  | 45  | 48  | 35,0     | 37,0  | 19/26  | 20/28 | -            | -    | 33,8                          | 33,3 | -            | -     | -             | -    |
| Sanchez (2013)*      | OB, M            | Canada       | <i>L. rham.</i>                                                                                                               | 3,2E+08          | 24                  | 19  | 20  | -        | -     | 19/0   | 20/0  | -            | -    | 34,0                          | 33,5 | -            | -     | -             | -    |
| Sanchez (2013)*      | OB, F            | Canada       | <i>L. rham.</i>                                                                                                               | 3,2E+08          | 24                  | 26  | 28  | -        | -     | 0/26   | 0/28  | -            | -    | 33,6                          | 33,2 | -            | -     | -             | -    |
| Sato (2017)          | T2DM             | Japan        | <i>L. cas. gr.</i>                                                                                                            | 4,0E+10          | 16                  | 34  | 34  | 64,0     | 65,0  | 29/5   | 20/14 | -            | -    | 24,2                          | 24,6 | -            | -     | -             | -    |
| Sepideh (2015)       | NAFLD            | Iran         | <i>B. brev.</i> , <i>B. lon.</i> , <i>S. ther.</i> , <i>L. acid.</i> , <i>L. del.</i> , <i>L. rham.</i> , <i>L. cas. gr.</i>  | 6,2E+10          | 8                   | 21  | 21  | 42,1     | 47,3  | 13/8   | 15/6  | -            | -    | 30,3                          | 29,5 | -            | -     | -             | -    |



| Study                    | Population          | Country | Probiotics                                                                                                                                                          | Daily dose (cfu) | Trial length (week) | n   |     | Mean age |      | Gender |       | Mean BW (kg) |       | Mean BMI (kg/m <sup>2</sup> ) |      | Mean WC (cm) |       | Mean BFM (kg) |      |
|--------------------------|---------------------|---------|---------------------------------------------------------------------------------------------------------------------------------------------------------------------|------------------|---------------------|-----|-----|----------|------|--------|-------|--------------|-------|-------------------------------|------|--------------|-------|---------------|------|
|                          |                     |         |                                                                                                                                                                     |                  |                     | INT | CTL | INT      | CTL  | INT    | CTL   | INT          | CTL   | INT                           | CTL  | INT          | CTL   | INT           | CTL  |
| Sharafedtinov (2013)     | OB, HT              | Russia  | <i>L. plan.</i>                                                                                                                                                     | 7,5E+12          | 3                   | 25  | 15  | 52,0     | 51,7 | 9/16   | 4/11  | 105,6        | 102,4 | 37,7                          | 36,3 | -            | -     | 46,7          | 46,4 |
| Shavakhi (2013)          | NASH                | Iran    | <i>B. brev.</i> , <i>B. lon.</i> ,<br><i>S. ther.</i> , <i>L. acid.</i> , <i>L. del.</i> , <i>L. rham.</i> , <i>L. cas. gr.</i>                                     | 1,9E+09          | 6                   | 31  | 32  | 41,5     | 38,7 | 15/17  | 17/14 | -            | -     | 28,6                          | 28,2 | -            | -     | -             | -    |
| Sherf-Dagan (2017)       | NAFLD, SG           | Israel  | <i>B. bif.</i> , <i>B. brev.</i> , <i>B. lon.</i> ,<br><i>S. ther.</i> , <i>Lc. lac.</i> , <i>L. acid.</i> , <i>L. rham.</i> , <i>L. cas. gr.</i> , <i>L. plan.</i> | 5,0E+10          | 26                  | 40  | 40  | 42,1     | 44,2 | 18/22  | 16/24 | -            | -     | 42,1                          | 42,1 | -            | -     | -             | -    |
| Simon (2015)             | NW, OB              | Germany | <i>L. reut.</i>                                                                                                                                                     | 2,0E+10          | 8                   | 11  | 10  | -        | 50,0 | -      | -     | 87,0         | 87,0  | -                             | -    | -            | -     | 30,5          | 29,6 |
| Stenman T1 (2016)        | OW, OB              | Finland | <i>B. lac.</i>                                                                                                                                                      | 1,0E+10          | 26                  | 48  | 53  | 50,6     | 48,8 | 9/39   | 12/41 | 88,7         | 88,5  | 31,5                          | 31,2 | 102,6        | 103,4 | 36,6          | 36,4 |
| Stenman T2 (2016)        | OW, OB              | Finland | <i>B. lac.</i>                                                                                                                                                      | 1,0E+10          | 26                  | 52  | 53  | 47,0     | 48,8 | 9,43   |       | 87,8         | 89,4  | 31,3                          | -    | 102,5        | -     | 37,6          |      |
| Tajabadi-Ebrahimi (2016) | T2DM                | Iran    | <i>B. bif.</i> , <i>L. acid.</i> , <i>L. cas. gr.</i>                                                                                                               | 6,0E+09          | 12                  | 30  | 30  | 64,2     | 64,0 | -      |       | 79,2         | 74,3  | 32,3                          | 29,6 | -            | -     | -             | -    |
| Tajadadi (2014)          | OW, T2DM, CHD       | Iran    | <i>L. spor.</i>                                                                                                                                                     | 1,2E+10          | 8                   | 27  | 27  | 52,0     | 53,4 | 5/22   | 5/22  | -            | -     | 27,5                          | 27,9 | -            | -     | -             | -    |
| Takahashi (2016)         | Healthy             | Japan   | <i>B. lac.</i>                                                                                                                                                      | 8,0E+10          | 12                  | 69  | 68  | 46,9     | 46,9 | 46/23  | 41/27 | 75,0         | 74,9  | 26,8                          | 26,9 | -            | -     | -             | -    |
| Tonucci (2015)           | T2DM                | Brazil  | <i>B. lac.</i> , <i>L. acid.</i>                                                                                                                                    | 1,0E+09          | 6                   | 23  | 22  | 51,8     | 51,0 | 12/11  | 14/8  | -            | -     | -                             | -    | -            | -     | -             | -    |
| Tripolt (2013)           | MetS                | Austria | <i>L. cas. gr.</i>                                                                                                                                                  | 2,0E+10          | 12                  | 30  | 30  | 51,0     | 55,0 | 9/4    | 9/6   | -            | -     | 34,9                          | 31,4 | -            | -     | -             | -    |
| Vajro (2011)             | OB, NAFLD, children | Italy   | <i>L. rham.</i>                                                                                                                                                     | 1,2E+10          | 8                   | 10  | 10  | 10,7     | 10,7 | 18/2   | 18/2  | -            | -     | 24,3                          | 22,5 | -            | -     | -             | -    |
| Zarrati (2014)           | OW, OB              | Iran    | <i>B. lac.</i> , <i>L. acid.</i> , <i>L. cas. gr.</i>                                                                                                               | 6,0E+09          | 8                   | 25  | 25  | 36,0     | 36,0 | -      | 24/51 | 90,6         | 87,0  | 33,8                          | 33,9 | 113,3        | 110,3 | -             | -    |

\*These trials were only used for subgroup analysis by gender.

Heading: CTL, Control group; INT, Intervention group; Gender, females/males.

Outcomes: BFM, Body fat mass; BMI, Body mass index; BW, Body weight; WC, Waist circumference

Populations: AD, Alzheimer's disease; BP, blood pressure; CHD, coronary heart disease; F, females; GB, gastric bypass; GDM, gestational diabetes mellitus; HT, hypertension; HTG, hypertriglyceridemia; IGT, impaired glucose tolerance; LVF, large visceral fat; M, males; MDD, major depressive disorder; NAFLD, non-alcoholic fatty liver disease; NASH, non-alcoholic steatohepatitis; NGT, normal glucose tolerance; NW, normal weight; MS, multiple sclerosis; MetS, Metabolic syndrome; OB, obese; OW, overweight; SG, sleeve gastrectomy; T2DM, type 2 diabetes mellitus.

Species: *B. brev.*, *Bifidobacterium breve*; *B. lac.*, *Bifidobacterium animalis* subsp. *lactis*; *B. lon.*, *Bifidobacterium longum*; *L. acid.*, *Lactobacillus acidophilus*; *L. amyl.*, *Lactobacillus amylovorus*; *L. bifid.*, *Lactobacillus bifidum*; *L. del.*, *Lactobacillus delbrueckii*; *L. cas. gr.*, *Lactobacillus casei* or *paracasei*; *L. cur.*, *Lactobacillus curvatus*; *L. fer.*, *Lactobacillus fermentum*; *L. gas.*, *Lactobacillus gasseri*; *L. hel.*, *Lactobacillus helveticus*; *L. plan.*, *Lactobacillus plantarum*; *L. reut.*, *Lactobacillus reuteri*; *L. rham.*, *Lactobacillus rhamnosus*; *L. sal.*, *Lactobacillus salivarius*; *L. spor.*, *Lactobacillus sporogenes* (*Bacillus coagulans*); *Lc. lact.*, *Lactococcus lactis*; *S. therm.*, *Streptococcus salivarius* subsp. *thermophilus*, *P. pen.*; *Pediococcus pentosaceus*.



**Supplementary Table 2: Characteristics of included randomized controlled trials of probiotics: glucose homeostasis, systemic inflammation, liver enzymes and triglycerides.**

| Study                              | Mean FG (mmol/l) |     | Mean HbA <sub>1c</sub> (%) |     | Mean INS (mU/l) |      | Mean HOMA-IR |     | Mean CRP (mg/l) |     | Mean TG (mg/dl) |       | Mean ALAT (U/l) |      | Mean ASAT (U/l) |      | Mean GGT (U/l) |      |
|------------------------------------|------------------|-----|----------------------------|-----|-----------------|------|--------------|-----|-----------------|-----|-----------------|-------|-----------------|------|-----------------|------|----------------|------|
|                                    | INT              | CTL | INT                        | CTL | INT             | CTL  | INT          | CTL | INT             | CTL | INT             | CTL   | INT             | CTL  | INT             | CTL  | INT            | CTL  |
| Agerholm-Larsen (2000)             | -                | -   | -                          | -   | -               | -    | -            | -   | -               | -   | 126,7           | 177,1 | -               | -    | -               | -    | -              | -    |
| Agerholm-Larsen (2000)             | -                | -   | -                          | -   | -               | -    | -            | -   | -               | -   | 138,2           |       | -               | -    | -               | -    | -              | -    |
| Ahmadi (2016)                      | 5,3              | 5,1 | -                          | -   | 13,1            | 13,3 | 3,1          | 3,1 | -               | -   | 171,3           | 181,1 | -               | -    | -               | -    | -              | -    |
| Ahn (2015)                         | 5,0              | 5,0 | -                          | -   | 9,2             | 9,7  | 2,0          | 2,2 | 1,3             | 1,1 | 210,2           | 207,0 | -               | -    | -               | -    | -              | -    |
| Akbari (2016)                      | 5,1              | 4,6 | -                          | -   | -               | -    | 1,3          | 1,4 | 6,6             | 4,5 | 119,6           | 84,3  | -               | -    | -               | -    | -              | -    |
| Akkasheh (2016)                    | 5,7              | 5,0 | -                          | -   | -               | -    | -            | -   | -               | -   | 126,1           | 105,0 | -               | -    | -               | -    | -              | -    |
| Alisi (2014)                       | -                | -   | -                          | -   | -               | -    | 4,3          | 4,7 | -               | -   | 99,0            | 98,0  | 34,0            | 42,0 | -               | -    | -              | -    |
| Aller (2011)                       | 6,4              | 6,1 | -                          | -   | 14,5            | 13,4 | 4,5          | 4,2 | -               | -   | 171,1           | 134,8 | -               | -    | -               | -    | -              | -    |
| Andreasen (2010)                   | -                | -   | -                          | -   | -               | -    | -            | -   | 1,3             | 1,5 | -               | -     | -               | -    | -               | -    | -              | -    |
| Asemi (1) (2014)                   | 8,2              | 9,3 | -                          | -   | 8,8             | 8,1  | 3,1          | 3,3 | -               | -   | 137,3           | 169,9 | -               | -    | -               | -    | -              | -    |
| Asemi (2) (2013)                   | 5,3              | 5,1 | -                          | -   | 8,8             | 6,9  | 2,1          | 1,5 | -               | -   | -               | -     | -               | -    | -               | -    | -              | -    |
| Asemi (3) (2013)                   | 8,0              | 7,5 | 7,7                        | 6,4 | 5,7             | 5,8  | 2,0          | 2,0 | 2,8             | 2,1 | 159,5           | 134,0 | -               | -    | -               | -    | -              | -    |
| Asgharian (2016 & 2017)            | 5,4              | 5,6 | -                          | -   | -               | -    | -            | -   | 1,8             | 1,0 | 162,6           | 174,7 | 23,8            | 27,9 | 24,7            | 24,8 | -              | -    |
| Badehnoosh (2018)                  | 5,2              | 5,1 | -                          | -   | -               | -    | -            | -   | 6,7             | 6,5 | -               | -     | -               | -    | -               | -    | -              | -    |
| Bahmani (2015)                     | -                | -   | -                          | -   | -               | -    | -            | -   | -               | -   | -               | -     | 24,3            | 23,7 | 23,3            | 22,4 | -              | -    |
| Barreto (2014)                     | 6,0              | 5,5 | -                          | -   | 12,7            | 9,4  | 3,6          | 2,5 | 1,1             | 2,1 | 154,5           | 118,0 | -               | -    | -               | -    | 39,5           | 27,0 |
| Behrouz (2017)                     | 5,1              | 5,5 | -                          | -   | 16,7            | 17,4 | 3,8          | 4,7 | -               | -   | -               | -     | -               | -    | -               | -    | -              | -    |
| Bernini (2015)                     | 5,2              | 5,4 | -                          | -   | 13,4            | 13,9 | 3,4          | 3,6 | -               | -   | 163,0           | 199,0 | -               | -    | -               | -    | -              | -    |
| Brahe (2015)                       | 5,9              | 5,8 | -                          | -   | 15,7            | 12,3 | 5,1          | 3,9 | 2,9             | 4,1 | 149,7           | 94,8  | -               | -    | -               | -    | -              | -    |
| De Roos (1999)                     | -                | -   | -                          | -   | -               | -    | -            | -   | -               | -   | 100,1           | 108,1 | -               | -    | -               | -    | -              | -    |
| Dolatkhah (2015 & Hajifaraji 2018) | 5,8              | 5,6 | -                          | -   | 6,0             | 5,6  | 1,5          | 1,4 | 8,2             | 8,9 | -               | -     | -               | -    | -               | -    | -              | -    |
| Ebrahimi (2017)                    | 7,9              | 7,4 | 7,4                        | 7,5 | -               | -    | -            | -   | -               | -   | 144,9           | 122,0 | -               | -    | -               | -    | -              | -    |
| Ejtahed (2012)                     | 8,1              | 7,4 | 7,3                        | 6,9 | 7,5             | 6,3  | -            | -   | -               | -   | -               | -     | -               | -    | -               | -    | -              | -    |
| Ekhlası (2016)                     | 6,4              | 6,0 | -                          | -   | 2,2             | 2,1  | -            | -   | -               | -   | 187,5           | 182,8 | 38,1            | 33,9 | 38,0            | 32,0 | -              | -    |

| Study                    | Mean FG (mmol/l) |     | Mean HbA <sub>1c</sub> (%) |     | Mean INS (mU/l) |      | Mean HOMA-IR |     | Mean CRP (mg/l) |     | Mean TG (mg/dl) |       | Mean ALAT (U/l) |      | Mean ASAT (U/l) |      | Mean GGT (U/l) |      |
|--------------------------|------------------|-----|----------------------------|-----|-----------------|------|--------------|-----|-----------------|-----|-----------------|-------|-----------------|------|-----------------|------|----------------|------|
|                          | INT              | CTL | INT                        | CTL | INT             | CTL  | INT          | CTL | INT             | CTL | INT             | CTL   | INT             | CTL  | INT             | CTL  | INT            | CTL  |
| Eslamparast (1) (2014)   | 5,5              | 5,5 | -                          | -   | 11,2            | 11,1 | 2,8          | 2,7 | 4,2             | 4,3 | -               | -     | 69,3            | 71,5 | 66,4            | 68,3 | 89,5           | 89,0 |
| Eslamparast (2) (2014)   | 5,6              | 5,8 | -                          | -   | 9,9             | 10,5 | 2,6          | 2,8 | -               | -   | 228,5           | 235,6 | -               | -    | -               | -    | -              | -    |
| Famouri (2017)           | -                | -   | -                          | -   | -               | -    | -            | -   | -               | -   | 112,5           | 96,0  | 32,8            | 28,9 | 32,2            | 30,2 | -              | -    |
| Feizollahzadeh (2016)    | 7,4              | 7,5 | -                          | -   | -               | -    | -            | -   | 4,5             | 5,3 | 287,0           | 271,0 | -               | -    | -               | -    | -              | -    |
| Firouzi T1 (2015 & 2016) | 7,3              | 7,9 | 7,5                        | 7,3 | 13,1            | 12,0 | 3,1          | 3,8 | -               | -   | 121,3           | 108,9 | 23,2            | 32,5 | 26,8            | 20,1 | -              | -    |
| Goebel (2012)            | 5,2              | 5,3 | -                          | -   | 14,5            | 15,1 | 4,0          | 4,3 | 2,1             | 2,5 | 97,4            | 108,1 | -               | -    | -               | -    | -              | -    |
| Gomes (2017)             | -                | -   | 6,1                        | 6,5 | -               | -    | -            | -   | -               | -   | 132,9           | 141,7 | -               | -    | -               | -    | -              | -    |
| Higashikawa (2016)       | 5,6              | 5,4 | 5,2                        | 5,2 | 7,5             | 8,6  | 1,9          | 2,1 | -               | -   | 127,9           | 114,6 | -               | -    | -               | -    | -              | -    |
| Higashikawa T1 (2010)    | -                | -   | -                          | -   | -               | -    | -            | -   | -               | -   | -               | -     | 20,7            | 16,2 | 20,4            | 18,9 | 23,0           | 23,9 |
| Higashikawa T2 (2010)    | -                | -   | -                          | -   | -               | -    | -            | -   | -               | -   | -               | -     | 31,1            | 16,2 | 23,8            | 18,9 | 37,0           | 23,9 |
| Hove (2015)              | 8,0              | 9,1 | 6,8                        | 7,3 | 6,9             | 6,0  | 3,6          | 2,5 | 0,7             | 1,6 | 124,0           | 124,0 | -               | -    | -               | -    | -              | -    |
| Hulston (2015)           | 5,8              | 5,3 | -                          | -   | 11,2            | 11,9 | -            | -   | -               | -   | 124,0           | 124,0 | -               | -    | -               | -    | -              | -    |
| Hutt T1 (2014)           | 5,3              | 5,2 | -                          | -   | -               | -    | -            | -   | 1,0             | 1,0 | 97,4            | 97,4  | -               | -    | -               | -    | -              | -    |
| Hutt T2 (2014)           | 5,0              | 5,0 | -                          | -   | -               | -    | -            | -   | 0,7             | 0,8 | 88,6            | 88,6  | -               | -    | -               | -    | -              | -    |
| Ilmonen (2011)           | 4,9              | 5,0 | -                          | -   | -               | -    | 1,1          | 1,2 | -               | -   | -               | -     | -               | -    | -               | -    | -              | -    |
| Inoue (2003)             | 5,4              | 5,6 | -                          | -   | -               | -    | -            | -   | -               | -   | 139,9           | 134,4 | 28,1            | 26,4 | 27,0            | 23,5 | -              | -    |
| Ivey T1 (2014)           | 5,6              | 5,4 | 5,9                        | 5,6 | 9,6             | 10,0 | 2,5          | 2,4 | -               | -   | 150,6           | 135,5 | -               | -    | -               | -    | -              | -    |
| Ivey T2 (2014)           | 5,5              | -   | 5,7                        | -   | 9,9             | -    | 2,5          | -   | -               | -   | 150,6           | -     | -               | -    | -               | -    | -              | -    |
| Ivey T3 (2014)           | 5,6              | -   | 5,8                        | -   | 9,8             | -    | 2,5          | -   | -               | -   | 139,9           | -     | -               | -    | -               | -    | -              | -    |
| Jafarnejad (2016)        | 5,1              | 5,2 | 4,8                        | 4,6 | 19,1            | 18,7 | 4,3          | 4,4 | 5,7             | 5,0 | -               | -     | -               | -    | -               | -    | -              | -    |
| Jamilian (2016)          | 4,5              | 4,6 | -                          | -   | 11,1            | 12,8 | 2,3          | -   | 7,9             | 4,8 | 156,1           | 141,5 | -               | -    | -               | -    | -              | -    |
| Javadi (2017)            | 5,7              | 5,6 | -                          | -   | 5,9             | 4,6  | 1,5          | 1,1 | -               | -   | 190,6           | 172,1 | 58,1            | 49,1 | 51,6            | 42,7 | 43,7           | 31,4 |
| Jung (2013)              | 5,7              | 5,8 | 5,8                        | 5,8 | 10,6            | 9,9  | -            | -   | -               | 1,3 | 144,5           | 124,4 | 24,6            | 24,3 | -               | -    | 33,6           | 36,0 |
| Jung (2015 & Kim 2018)   | 4,7              | 4,6 | -                          | -   | 0,1             | 0,1  | -            | -   | 1,4             | -   | 107,6           | 106,8 | -               | -    | -               | -    | -              | -    |
| Kadooka (2010)           | 5,2              | 5,2 | 5,3                        | 5,3 | 11,6            | 9,9  | -            | -   | -               | -   | 131,3           | 136,8 | 27,8            | 26,5 | 21,7            | 21,8 | 39,3           | 40,0 |
| Karamali (2016)          | 5,4              | 5,1 | -                          | -   | 12,0            | 13,2 | 2,9          | 3,0 | -               | -   | 192,7           | 187,7 | -               | -    | -               | -    | -              | -    |

| Study               | Mean FG (mmol/l) |      | Mean HbA <sub>1c</sub> (%) |     | Mean INS (mU/l) |      | Mean HOMA-IR |      | Mean CRP (mg/l) |     | Mean TG (mg/dl) |       | Mean ALAT (U/l) |      | Mean ASAT (U/l) |      | Mean GGT (U/l) |      |
|---------------------|------------------|------|----------------------------|-----|-----------------|------|--------------|------|-----------------|-----|-----------------|-------|-----------------|------|-----------------|------|----------------|------|
|                     | INT              | CTL  | INT                        | CTL | INT             | CTL  | INT          | CTL  | INT             | CTL | INT             | CTL   | INT             | CTL  | INT             | CTL  | INT            | CTL  |
| Karbaschian (2018)  | 5,7              | 5,5  | -                          | -   | 17,2            | 16,9 | 12,5         | 12,4 | 8,1             | 8,8 | 162,1           | 153,4 | -               | -    | -               | -    | -              | -    |
| Khalili (2018)      | 9,1              | 8,3  | 7,3                        | 6,8 | 17,2            | 17,9 | -            | -    | -               | -   | -               | -     | -               | -    | -               | -    | -              | -    |
| Kijmanawat (2018)   | 4,6              | 4,6  | -                          | -   | 8,8             | 6,8  | 1,8          | 1,4  | -               | -   | -               | -     | -               | -    | -               | -    | -              | -    |
| Laitinen (2008)     | 4,7              | 4,7  | 5,0                        | 5,0 | 6,3             | 5,1  | 1,3          | 1,1  | -               | -   | -               | -     | -               | -    | -               | -    | -              | -    |
| Lee (2014)          | 5,4              | 5,6  | -                          | -   | -               | 5,1  | -            | 1,1  | -               | -   | 191,0           | 132,0 | -               | -    | -               | -    | -              | -    |
| Lee T1 (2017)       | 4,8              | 4,8  | -                          | -   | 5,1             | -    | 1,1          | -    | 2,1             | 2,1 | 90,4            | 90,4  | -               | -    | -               | -    | -              | -    |
| Lee T2 (2017)       | 4,8              | -    | -                          | -   | 5,1             | -    | 1,1          | -    | 2,1             | 2,1 | 90,4            | -     | -               | -    | -               | -    | -              | -    |
| Lindsay (2015)      | 4,8              | 4,9  | -                          | -   | 13,9            | 14,6 | 3,0          | 3,3  | -               | -   | 217,9           | 212,6 | -               | -    | -               | -    | -              | -    |
| Lindsay (2014)      | 4,7              | 4,8  | -                          | -   | 13,9            | 16,7 | 2,9          | 3,5  | 7,9             | 8,4 | 153,2           | 177,1 | -               | -    | -               | -    | -              | -    |
| Madjd (2016)        | 5,1              | 5,0  | 5,1                        | 5,0 | 12,9            | 12,7 | 2,9          | 2,9  | -               | -   | 131,1           | 131,1 | -               | -    | -               | -    | -              | -    |
| Mahboobi (2014)     | -                | -    | -                          | -   | -               | -    | -            | -    | -               | -   | 151,5           | 170,3 | -               | -    | -               | -    | -              | -    |
| Manzhali (2017)     | 4,9              | 5,0  | -                          | -   | -               | -    | -            | -    | -               | -   | 129,3           | 122,2 | 56,8            | 52,4 | 43,1            | 41,9 | 59,7           | 64,6 |
| Mazloom (2013)      | 8,8              | 8,3  | -                          | -   | 11,8            | 7,2  | 2,9          | 1,7  | 3,2             | 2,2 | 182,2           | 178,7 | -               | -    | -               | -    | -              | -    |
| Minami (2015)       | 9,9              | 8,6  | 7,5                        | 7,0 | 32,0            | 39,9 | -            | -    | 1,0             | 0,9 | -               | -     | 34,0            | 28,6 | 29,7            | 26,4 | 37,0           | 39,0 |
| Mobini T1 (2017)    | 13,9             | 11,9 | 8,1                        | 7,7 | -               | -    | -            | -    | 2,0             | 3,3 | 159,4           | 186,0 | 30,0            | 34,7 | 23,5            | 25,9 | -              | -    |
| Mofidi (2017)       | -                | -    | -                          | -   | -               | -    | -            | -    | -               | -   | -               | -     | -               | -    | 63,6            | 72,7 | -              | -    |
| Mohamadshahi (2014) | 9,7              | 10,4 | 8,2                        | 8,3 | -               | -    | -            | -    | 3,3             | 3,1 | -               | -     | -               | -    | -               | -    | -              | -    |
| Mohseni (2017)      | 12,5             | 11,2 | 8,0                        | 7,9 | 17,4            | 16,5 | 9,8          | 8,5  | -               | -   | 137,6           | 134,9 | -               | -    | -               | -    | -              | -    |
| Nabavi (2014)       | 5,0              | 4,8  | -                          | -   | 1,0             | 1,0  | 2,5          | 2,1  | -               | -   | 194,2           | 197,5 | 31,5            | 25,5 | 32,5            | 26,0 | -              | -    |
| Naito (2017)        | 6,1              | 6,1  | 5,7                        | 5,8 | 8,0             | 7,9  | 2,2          | 2,2  | -               | -   | 153,4           | 160,3 | -               | -    | -               | -    | -              | -    |
| Naruszewicz (2002)  | 6,1              | 5,7  | -                          | -   | 11,1            | 8,3  | -            | -    | -               | -   | 121,3           | 124,0 | -               | -    | -               | -    | -              | -    |
| Odamaki (2016)      | 4,4              | 4,4  | 5,3                        | 5,2 | -               | -    | -            | -    | 0,5             | 0,2 | 118,0           | 80,0  | 16,0            | 17,0 | 19,0            | 20,0 | 36,0           | 20,0 |
| Ogawa (2014)        | 5,2              | 5,2  | 5,1                        | 5,0 | 10,6            | 9,0  | -            | -    | -               | -   | 268,3           | 246,5 | 23,2            | 24,8 | 21,0            | 20,8 | 48,3           | 49,2 |
| Ostadrahimi (2015)  | 9,0              | 10,2 | 7,6                        | 7,0 | -               | -    | -            | -    | -               | -   | 179,3           | 176,7 | -               | -    | -               | -    | -              | -    |
| Osterberg (2015)    | 4,5              | 4,0  | -                          | -   | 6,1             | 5,2  | -            | -    | 2,0             | 1,4 | -               | -     | -               | -    | -               | -    | -              | -    |
| Rajkumar (2015)     | 4,7              | 4,7  | -                          | -   | 18,7            | 18,8 | 3,7          | 3,9  | 2,6             | 2,7 | 111,0           | 112,0 | -               | -    | -               | -    | -              | -    |

| Study                    | Mean FG (mmol/l) |     | Mean HbA <sub>1c</sub> (%) |     | Mean INS (mU/l) |      | Mean HOMA-IR |     | Mean CRP (mg/l) |      | Mean TG (mg/dl) |       | Mean ALAT (U/l) |       | Mean ASAT (U/l) |       | Mean GGT (U/l) |      |
|--------------------------|------------------|-----|----------------------------|-----|-----------------|------|--------------|-----|-----------------|------|-----------------|-------|-----------------|-------|-----------------|-------|----------------|------|
|                          | INT              | CTL | INT                        | CTL | INT             | CTL  | INT          | CTL | INT             | CTL  | INT             | CTL   | INT             | CTL   | INT             | CTL   | INT            | CTL  |
| Rajkumar (2014)          | 4,9              | 5,0 | -                          | -   | 18,4            | 17,9 | 4,0          | 3,9 | 5,6             | 5,3  | 140,7           | 128,0 | -               | -     | -               | -     | -              | -    |
| Sabico (2017)            | 11,7             | 7,0 | -                          | -   | 9,9             | 13,1 | 5,3          | 4,1 | -               | -    | 221,4           | 194,9 | -               | -     | -               | -     | -              | -    |
| Sadrzadeh (2009)         | -                | -   | -                          | -   | -               | -    | -            | -   | -               | -    | 98,3            | 78,8  | -               | -     | -               | -     | -              | -    |
| Safavi (2013)            | 4,8              | 4,8 | -                          | -   | -               | -    | -            | -   | -               | -    | 133,7           | 115,1 | -               | -     | -               | -     | -              | -    |
| Sanchez (2013)           | 4,9              | 5,1 | -                          | -   | -               | -    | -            | -   | 4,6             | 5,4  | -               | -     | -               | -     | -               | -     | -              | -    |
| Sanchez (2013)*          | 5,3              | 5,5 | -                          | -   | -               | -    | -            | -   | 3,9             | 3,0  | -               | -     | -               | -     | -               | -     | -              | -    |
| Sanchez (2013)*          | 4,6              | 4,9 | -                          | -   | -               | -    | -            | -   | 5,1             | 6,8  | -               | -     | -               | -     | -               | -     | -              | -    |
| Sato (2017)              | 7,1              | 7,2 | 6,9                        | 6,8 | -               | -    | -            | -   | -               | -    | 104,7           | 109,4 | -               | -     | -               | -     | -              | -    |
| Sepideh (2015)           | 5,4              | 5,4 | 5,9                        | 5,8 | 11,2            | 12,5 | 2,7          | 3,0 | -               | -    | -               | -     | -               | -     | -               | -     | -              | -    |
| Sharafedinov (2013)      | 7,2              | 6,8 | -                          | -   | -               | -    | -            | -   | -               | -    | 248,0           | 189,5 | 32,8            | 45,3  | 23,5            | 31,5  | -              | -    |
| Shavakhi (2013)          | 5,5              | 5,5 | -                          | -   | -               | -    | -            | -   | -               | -    | 260,5           | 242,5 | 133,7           | 118,4 | 123,1           | 125,3 | -              | -    |
| Sherf-Dagan (2017)       | 5,1              | 5,1 | 5,8                        | 5,8 | -               | -    | 6,5          | 5,6 | 11,5            | 12,3 | 155,8           | 156,7 | 36,5            | 36,6  | 27,3            | 26,6  | 36,7           | 36,5 |
| Simon (2015)             | -                | -   | -                          | -   | -               | -    | -            | -   | 1,7             | 1,7  | -               | -     | -               | -     | -               | -     | -              | -    |
| Stenman T1 (2016)        | 5,2              | 5,2 | -                          | -   | 9,1             | 8,3  | 2,1          | 2,0 | 2,8             | 1,7  | 113,4           | 108,1 | -               | -     | -               | -     | -              | -    |
| Stenman T2 (2016)        | 5,2              | 5,2 | -                          | -   | 8,4             | 7,8  | 2,0          | 1,9 | 2,5             | 2,2  | 115,1           | 112,5 | -               | -     | -               | -     | -              | -    |
| Tajabadi-Ebrahimi (2016) | 8,3              | 7,0 | -                          | -   | 16,2            | 16,5 | 5,6          | 5,2 | -               | -    | 142,0           | 127,9 | -               | -     | -               | -     | -              | -    |
| Tajadadi (2014)          | 7,2              | 9,4 | -                          | -   | 8,2             | 7,8  | 2,7          | 3,3 | 5,9             | 3,9  | -               | -     | -               | -     | -               | -     | -              | -    |
| Tonucci (2015)           | 7,9              | 7,4 | 6,1                        | 5,4 | 7,5             | 8,3  | 2,6          | 2,2 | -               | -    | 141,7           | 162,1 | -               | -     | -               | -     | -              | -    |
| Tripolt (2013)           | 6,1              | 6,1 | -                          | -   | 11,7            | 11,6 | 3,1          | 3,2 | 3,7             | 4,9  | -               | -     | -               | -     | -               | -     | -              | -    |
| Vajro (2011)             | -                | -   | -                          | -   | -               | -    | -            | -   | -               | -    | -               | -     | 70,3            | 63,6  | -               | -     | -              | -    |

\*These trials were only used for subgroup analysis by gender.

Heading: CTL, Control group; INT, Intervention group; Gender, females/males.

Outcomes: ALAT, alanine aminotransferase; ASAT, aspartate aminotransferase; CRP, C-reactive protein; FG, Fasting glucose; GGT, gamma-glutamyl transferase; HbA<sub>1c</sub>, glycated haemoglobin; HOMA-IR, homeostatic model of insulin resistance; INS, insulin; TG, triglycerides.

SI conversion factors: To convert CRP to nmol/L, multiply values by 9.524. To convert ALAT, ASAT, and GGT to  $\mu$ kat/L multiply values by 0.0167. To convert triglycerides to mmol/L, divide values by 88.57.

**Supplementary Table 3. PEDro tool based quality score based on 10 factors, according to a standardized procedure and classified studies as high quality ( $\geq 8$  points), moderate quality ( $>6$  and  $<8$  points), or low quality.**

| Study                  | Random Allocation | Allocation Concealment | Similar at baseline | Blinding (subjects) | Blinding (therapists) | Blinding (outcome assessors) | Key outcome measurement<br>min 85% (LFU)<br>max 15% | Intention to treat | Between group comparison | Measure of variability | Quality |
|------------------------|-------------------|------------------------|---------------------|---------------------|-----------------------|------------------------------|-----------------------------------------------------|--------------------|--------------------------|------------------------|---------|
| Agerholm-Larsen (2000) | 1                 | 1                      | 1                   | 1                   | 1                     | 1                            | 1                                                   | 1                  | 1                        | 1                      | 10      |
| Ahmadi (2016)          | 1                 | 1                      | 1                   | 1                   | 1                     | 1                            | 1                                                   | 1                  | 1                        | 1                      | 10      |
| Ahn (2015)             | 1                 | 1                      | 1                   | 1                   | 1                     | 1                            | 1                                                   | 1                  | 1                        | 1                      | 10      |
| Aihara (2005)          | 1                 | 1                      | 1                   | 1                   | 1                     | 1                            | 1                                                   | 1                  | 1                        | 1                      | 10      |
| Akbari (2016)          | 1                 | 0                      | 1                   | 1                   | 1                     | 0                            | 1                                                   | 1                  | 1                        | 1                      | 8       |
| Akkasheh (2016)        | 1                 | 1                      | 0                   | 1                   | 1                     | 1                            | 1                                                   | 1                  | 1                        | 1                      | 9       |
| Alisi (2014)           | 1                 | 1                      | 0                   | 1                   | 1                     | 1                            | 1                                                   | 0                  | 1                        | 1                      | 8       |
| Aller (2011)           | 1                 | 0                      | 1                   | 1                   | 1                     | 0                            | 1                                                   | 0                  | 0                        | 1                      | 6       |
| Andreasen (2010)       | 1                 | 0                      | 1                   | 1                   | 1                     | 0                            | 1                                                   | 0                  | 1                        | 1                      | 7       |
| Asemi (1) (2014)       | 1                 | 0                      | 1                   | 1                   | 0                     | 0                            | 1                                                   | 0                  | 1                        | 1                      | 6       |
| Asemi (2) (2013)       | 1                 | 0                      | 1                   | 1                   | 1                     | 0                            | 1                                                   | 0                  | 1                        | 1                      | 7       |
| Asemi (3) (2013)       | 1                 | 0                      | 1                   | 1                   | 1                     | 0                            | 1                                                   | 0                  | 1                        | 1                      | 7       |
| Asgharian (2016)       | 1                 | 1                      | 1                   | 1                   | 1                     | 1                            | 1                                                   | 0                  | 1                        | 1                      | 9       |
| Badehnoosh (2018)      | 1                 | 1                      | 1                   | 1                   | 1                     | 1                            | 1                                                   | 1                  | 1                        | 1                      | 10      |
| Bahmani (2015)         | 1                 | 1                      | 1                   | 1                   | 1                     | 1                            | 1                                                   | 1                  | 1                        | 1                      | 10      |
| Barreto (2014)         | 0                 | 0                      | 1                   | 0                   | 0                     | 0                            | 1                                                   | 0                  | 1                        | 1                      | 4       |
| Behrouz (2017)         | 1                 | 0                      | 1                   | 1                   | 1                     | 1                            | 1                                                   | 1                  | 1                        | 1                      | 9       |
| Bernini (2015)         | 1                 | 0                      | 1                   | 0                   | 0                     | 0                            | 1                                                   | 1                  | 0                        | 1                      | 5       |
| Brahe (2015)           | 1                 | 1                      | 1                   | 1                   | 1                     | 1                            | 1                                                   | 0                  | 1                        | 1                      | 9       |
| Burton (2017)          | 1                 | 1                      | 1                   | 1                   | 1                     | 1                            | 1                                                   | 0                  | 1                        | 1                      | 9       |
| Chung (2016)           | 1                 | 0                      | 0                   | 1                   | 1                     | 1                            | 1                                                   | 1                  | 1                        | 1                      | 8       |
| De Roos (1999)         | 1                 | 0                      | 0                   | 1                   | 1                     | 1                            | 1                                                   | 0                  | 1                        | 1                      | 7       |

| Study                  | Random Allocation | Allocation Concealment | Similar at baseline | Blinding (subjects) | Blinding (therapists) | Blinding (outcome assessors) | Key outcome measurement min 85% (LFU max 15%) | Intention to treat | Between group comparison | Measure of variability | Quality |
|------------------------|-------------------|------------------------|---------------------|---------------------|-----------------------|------------------------------|-----------------------------------------------|--------------------|--------------------------|------------------------|---------|
| Dolatkhah (2015)       | 1                 | 1                      | 1                   | 1                   | 1                     | 1                            | 1                                             | 1                  | 1                        | 1                      | 10      |
| Ebrahimi (2017)        | 1                 | 1                      | 1                   | 1                   | 1                     | 1                            | 1                                             | 1                  | 1                        | 1                      | 10      |
| Ejtahed (2012)         | 1                 | 1                      | 1                   | 1                   | 1                     | 1                            | 1                                             | 0                  | 1                        | 1                      | 9       |
| Ekhlas (2016)          | 1                 | 1                      | 1                   | 1                   | 1                     | 1                            | 1                                             | 0                  | 1                        | 1                      | 9       |
| Eslamparast (1) (2014) | 1                 | 0                      | 1                   | 1                   | 1                     | 0                            | 1                                             | 1                  | 1                        | 1                      | 8       |
| Eslamparast (2) (2014) | 1                 | 0                      | 1                   | 1                   | 1                     | 0                            | 1                                             | 1                  | 1                        | 1                      | 8       |
| Famouri (2017)         | 1                 | 1                      | 1                   | 1                   | 1                     | 1                            | 1                                             | 1                  | 1                        | 1                      | 10      |
| Feizollahzadeh (2016)  | 1                 | 1                      | 1                   | 1                   | 1                     | 1                            | 0                                             | 0                  | 1                        | 1                      | 8       |
| Firouzi (2015)         | 1                 | 1                      | 1                   | 1                   | 1                     | 1                            | 1                                             | 1                  | 1                        | 1                      | 10      |
| Goebel (2012)          | 1                 | 1                      | 1                   | 1                   | 1                     | 1                            | 1                                             | 0                  | 0                        | 1                      | 8       |
| Gomes (2017)           | 1                 | 1                      | 1                   | 1                   | 1                     | 1                            | 0                                             | 0                  | 1                        | 1                      | 8       |
| Hariri (2015)          | 1                 | 1                      | 1                   | 1                   | 1                     | 1                            | 0                                             | 0                  | 1                        | 1                      | 8       |
| Higashikawa (2016)     | 1                 | 1                      | 1                   | 1                   | 1                     | 1                            | 1                                             | 1                  | 1                        | 1                      | 10      |
| Higashikawa (2010)     | 1                 | 1                      | 1                   | 1                   | 1                     | 1                            | 1                                             | 0                  | 1                        | 1                      | 9       |
| Hove (2015)            | 1                 | 1                      | 1                   | 1                   | 1                     | 1                            | 1                                             | 1                  | 1                        | 1                      | 10      |
| Hulston (2015)         | 1                 | 0                      | 1                   | 0                   | 0                     | 0                            | 1                                             | 1                  | 1                        | 1                      | 6       |
| Hutt (2014)            | 1                 | 0                      | 0                   | 1                   | 1                     | 0                            | 1                                             | 1                  | 1                        | 1                      | 7       |
| Ibrahim (2018)         | 1                 | 0                      | 1                   | 0                   | 0                     | 0                            | 0                                             | 0                  | 0                        | 1                      | 3       |
| Ilmonen (2011)         | 1                 | 1                      | 1                   | 1                   | 1                     | 1                            | 0                                             | 0                  | 1                        | 1                      | 8       |
| Inoue (2003)           | 1                 | 1                      | 1                   | 1                   | 1                     | 1                            | 1                                             | 1                  | 1                        | 1                      | 10      |
| Ivey (2014)            | 1                 | 1                      | 1                   | 1                   | 1                     | 1                            | 1                                             | 0                  | 1                        | 1                      | 9       |
| Jafarnejad (2016)      | 1                 | 1                      | 1                   | 1                   | 1                     | 1                            | 0                                             | 0                  | 1                        | 1                      | 8       |
| Jamilian (2016)        | 1                 | 1                      | 1                   | 1                   | 1                     | 1                            | 1                                             | 1                  | 1                        | 1                      | 10      |
| Javadi (2017)          | 1                 | 1                      | 1                   | 1                   | 1                     | 1                            | 1                                             | 0                  | 1                        | 1                      | 9       |
| Jones (2018)           | 1                 | 0                      | 1                   | 1                   | 1                     | 1                            | 1                                             | 0                  | 1                        | 1                      | 8       |
| Jung (2013)            | 1                 | 0                      | 1                   | 1                   | 1                     | 0                            | 1                                             | 0                  | 1                        | 1                      | 7       |

| Study               | Random Allocation | Allocation Concealment | Similar at baseline | Blinding (subjects) | Blinding (therapists) | Blinding (outcome assessors) | Key outcome measurement min 85% (LFU max 15%) | Intention to treat | Between group comparison | Measure of variability | Quality |
|---------------------|-------------------|------------------------|---------------------|---------------------|-----------------------|------------------------------|-----------------------------------------------|--------------------|--------------------------|------------------------|---------|
| Jung (2015)         | 1                 | 0                      | 1                   | 1                   | 1                     | 1                            | 0                                             | 0                  | 1                        | 1                      | 7       |
| Kadooka (2013)      | 1                 | 1                      | 1                   | 1                   | 1                     | 1                            | 1                                             | 1                  | 1                        | 1                      | 10      |
| Kadooka (2010)      | 1                 | 0                      | 1                   | 1                   | 1                     | 0                            | 1                                             | 1                  | 1                        | 1                      | 8       |
| Karamali (2016)     | 1                 | 0                      | 1                   | 1                   | 1                     | 1                            | 1                                             | 1                  | 1                        | 1                      | 9       |
| Karbaschian (2018)  | 1                 | 1                      | 1                   | 1                   | 1                     | 1                            | 1                                             | 0                  | 1                        | 1                      | 9       |
| Khalili (2018)      | 1                 | 1                      | 1                   | 1                   | 1                     | 1                            | 1                                             | 1                  | 1                        | 1                      | 10      |
| Kijmanawat (2018)   | 1                 | 0                      | 1                   | 1                   | 1                     | 1                            | 1                                             | 0                  | 1                        | 1                      | 8       |
| Kouchaki (2016)     | 0                 | 1                      | 1                   | 1                   | 1                     | 1                            | 1                                             | 1                  | 1                        | 1                      | 9       |
| Laitinen (2008)     | 1                 | 1                      | 1                   | 1                   | 1                     | 1                            | 0                                             | 0                  | 1                        | 1                      | 8       |
| Lee (2017)          | 1                 | 0                      | 1                   | 0                   | 0                     | 1                            | 0                                             | 0                  | 1                        | 1                      | 5       |
| Lee (2014)          | 1                 | 0                      | 1                   | 1                   | 1                     | 0                            | 0                                             | 0                  | 1                        | 1                      | 6       |
| Lindsay (2015)      | 1                 | 1                      | 1                   | 1                   | 1                     | 1                            | 1                                             | 1                  | 1                        | 1                      | 10      |
| Lindsay (2014)      | 1                 | 1                      | 1                   | 1                   | 1                     | 1                            | 1                                             | 1                  | 1                        | 1                      | 10      |
| Madjd (2016)        | 1                 | 0                      | 1                   | 1                   | 1                     | 0                            | 1                                             | 1                  | 1                        | 1                      | 8       |
| Mahboobi (2014)     | 1                 | 0                      | 1                   | 1                   | 1                     | 0                            | 1                                             | 0                  | 1                        | 1                      | 7       |
| Manzhalii (2017)    | 1                 | 0                      | 1                   | 0                   | 0                     | 0                            | 1                                             | 1                  | 1                        | 1                      | 6       |
| Mazloom (2013)      | 1                 | 0                      | 1                   | 1                   | 0                     | 0                            | 1                                             | 1                  | 0                        | 1                      | 6       |
| Minami (2015)       | 1                 | 0                      | 1                   | 1                   | 1                     | 0                            | 1                                             | 0                  | 1                        | 1                      | 7       |
| Miraghajani (2017)  | 1                 | 1                      | 1                   | 1                   | 1                     | 1                            | 0                                             | 0                  | 1                        | 1                      | 8       |
| Mobini (2017)       | 1                 | 0                      | 1                   | 1                   | 1                     | 0                            | 1                                             | 0                  | 1                        | 1                      | 7       |
| Mofidi (2017)       | 1                 | 0                      | 1                   | 1                   | 1                     | 1                            | 0                                             | 0                  | 1                        | 1                      | 7       |
| Mohamadshahi (2014) | 1                 | 0                      | 1                   | 1                   | 1                     | 0                            | 1                                             | 0                  | 1                        | 1                      | 7       |
| Mohseni (2017)      | 1                 | 1                      | 1                   | 1                   | 1                     | 1                            | 1                                             | 1                  | 1                        | 1                      | 10      |
| Nabavi (2014)       | 1                 | 1                      | 1                   | 1                   | 1                     | 1                            | 1                                             | 1                  | 1                        | 1                      | 10      |
| Naito (2017)        | 1                 | 1                      | 1                   | 1                   | 1                     | 1                            | 1                                             | 0                  | 1                        | 1                      | 9       |
| Naruszewicz (2002)  | 1                 | 0                      | 1                   | 1                   | 1                     | 0                            | 1                                             | 1                  | 1                        | 1                      | 8       |



| Study                    | Random Allocation | Allocation Concealment | Similar at baseline | Blinding (subjects) | Blinding (therapists) | Blinding (outcome assessors) | Key outcome measurement min 85% (LFU max 15%) | Intention to treat | Between group comparison | Measure of variability | Quality |
|--------------------------|-------------------|------------------------|---------------------|---------------------|-----------------------|------------------------------|-----------------------------------------------|--------------------|--------------------------|------------------------|---------|
| Odamaki (2016)           | 1                 | 0                      | 1                   | 0                   | 0                     | 0                            | 1                                             | 0                  | 1                        | 1                      | 5       |
| Ogawa (2014)             | 1                 | 0                      | 1                   | 1                   | 0                     | 0                            | 1                                             | 0                  | 1                        | 1                      | 6       |
| Omar (2013)              | 1                 | 0                      | 1                   | 1                   | 1                     | 0                            | 1                                             | 1                  | 1                        | 1                      | 8       |
| Ostadrahimi (2015)       | 1                 | 0                      | 1                   | 1                   | 1                     | 0                            | 1                                             | 1                  | 1                        | 1                      | 8       |
| Osterberg (2015)         | 1                 | 0                      | 1                   | 1                   | 1                     | 0                            | 1                                             | 1                  | 1                        | 1                      | 8       |
| Rajkumar (2015)          | 1                 | 1                      | 1                   | 1                   | 1                     | 1                            | 1                                             | 1                  | 1                        | 1                      | 10      |
| Rajkumar (2014)          | 1                 | 1                      | 1                   | 1                   | 1                     | 1                            | 1                                             | 1                  | 1                        | 1                      | 10      |
| Sabico (2017)            | 1                 | 1                      | 1                   | 1                   | 1                     | 1                            | 0                                             | 1                  | 1                        | 1                      | 9       |
| Sadrzadeh (2009)         | 1                 | 1                      | 1                   | 1                   | 1                     | 1                            | 1                                             | 0                  | 1                        | 1                      | 9       |
| Safavi (2013)            | 1                 | 0                      | 1                   | 1                   | 1                     | 1                            | 0                                             | 0                  | 1                        | 1                      | 7       |
| Sanchez (2013)           | 1                 | 0                      | 1                   | 1                   | 1                     | 0                            | 0                                             | 0                  | 1                        | 1                      | 6       |
| Sato (2017)              | 1                 | 0                      | 1                   | 0                   | 0                     | 0                            | 1                                             | 0                  | 0                        | 1                      | 4       |
| Sepideh (2015)           | 1                 | 1                      | 1                   | 1                   | 1                     | 1                            | 1                                             | 1                  | 1                        | 1                      | 10      |
| Sharafedinov (2013)      | 1                 | 0                      | 1                   | 1                   | 1                     | 0                            | 1                                             | 1                  | 1                        | 1                      | 8       |
| Shavakhi (2013)          | 1                 | 0                      | 1                   | 1                   | 1                     | 0                            | 1                                             | 0                  | 1                        | 1                      | 7       |
| Sherf-Dagan (2017)       | 1                 | 1                      | 1                   | 1                   | 1                     | 1                            | 0                                             | 0                  | 1                        | 1                      | 8       |
| Simon (2015)             | 1                 | 0                      | 1                   | 1                   | 1                     | 0                            | 1                                             | 1                  | 0                        | 1                      | 7       |
| Stenman (2016)           | 1                 | 1                      | 1                   | 1                   | 1                     | 1                            | 1                                             | 1                  | 1                        | 1                      | 10      |
| Tajabadi-Ebrahimi (2016) | 1                 | 1                      | 1                   | 1                   | 1                     | 1                            | 1                                             | 1                  | 1                        | 1                      | 10      |
| Tajadadi (2014)          | 1                 | 1                      | 1                   | 1                   | 1                     | 1                            | 1                                             | 1                  | 1                        | 1                      | 10      |
| Takahashi (2016)         | 1                 | 1                      | 1                   | 1                   | 1                     | 1                            | 0                                             | 0                  | 1                        | 1                      | 8       |
| Tonucci (2015)           | 1                 | 1                      | 1                   | 1                   | 1                     | 1                            | 1                                             | 1                  | 1                        | 1                      | 10      |
| Tripold (2013)           | 1                 | 0                      | 1                   | 0                   | 0                     | 0                            | 1                                             | 1                  | 1                        | 1                      | 6       |
| Vajro (2011)             | 1                 | 0                      | 1                   | 1                   | 1                     | 0                            | 1                                             | 1                  | 1                        | 1                      | 8       |
| Zarrati (2014)           | 1                 | 0                      | 1                   | 1                   | 1                     | 0                            | 1                                             | 1                  | 1                        | 1                      | 8       |

**Supplementary Table 4. Effect of probiotics on body weight and body mass index. Subgroup analysis by study quality, study populations, daily dose (in CFU), food form, number of strains, species and subspecies.**

|                                                          | BW(kg) |      |             |                |              |              |              |              |                  | BMI (kg/m <sup>2</sup> ) |      |             |                |                  |              |              |              |                  |
|----------------------------------------------------------|--------|------|-------------|----------------|--------------|--------------|--------------|--------------|------------------|--------------------------|------|-------------|----------------|------------------|--------------|--------------|--------------|------------------|
|                                                          | RCT    | n    | $\tau^2$    | I <sup>2</sup> | P(het)       | E            | lb           | ub           | P                | RCT                      | n    | $\tau^2$    | I <sup>2</sup> | P(het)           | E            | lb           | ub           | P                |
| All studies                                              | 58     | 3422 | 0,06        | 22,6%          | 0,068        | <b>-0,39</b> | <b>-0,57</b> | <b>-0,21</b> | <b>&lt;0,001</b> | 68                       | 4015 | <b>0,38</b> | <b>86,3%</b>   | <b>&lt;0,001</b> | <b>-0,33</b> | <b>-0,53</b> | <b>-0,12</b> | <b>0,002</b>     |
| Excl. low quality studies                                | 49     | 2978 | <b>0,09</b> | <b>30,5%</b>   | <b>0,025</b> | <b>-0,42</b> | <b>-0,62</b> | <b>-0,22</b> | <b>&lt;0,001</b> | 55                       | 3389 | <b>0,23</b> | <b>79,3%</b>   | <b>&lt;0,001</b> | <b>-0,29</b> | <b>-0,48</b> | <b>-0,10</b> | <b>0,002</b>     |
| Excl. low/medium quality studies                         | 41     | 2593 | <b>0,09</b> | <b>33,6%</b>   | <b>0,021</b> | <b>-0,35</b> | <b>-0,57</b> | <b>-0,14</b> | <b>&lt;0,001</b> | 44                       | 2656 | <b>0,14</b> | <b>71,5%</b>   | <b>&lt;0,001</b> | <b>-0,26</b> | <b>-0,43</b> | <b>-0,08</b> | <b>0,004</b>     |
| Excl. studies with children                              | 57     | 3322 | 0,07        | 24,0%          | 0,057        | <b>-0,39</b> | <b>-0,57</b> | <b>-0,21</b> | <b>&lt;0,001</b> | 63                       | 3776 | <b>0,32</b> | <b>83,8%</b>   | <b>&lt;0,001</b> | <b>-0,34</b> | <b>-0,54</b> | <b>-0,13</b> | <b>0,001</b>     |
| Excl. studies with pregnant women                        | 51     | 2987 | 0,00        | 0,0%           | 0,859        | <b>-0,70</b> | <b>-0,90</b> | <b>-0,50</b> | <b>&lt;0,001</b> | 64                       | 3765 | <b>0,44</b> | <b>86,2%</b>   | <b>&lt;0,001</b> | <b>-0,38</b> | <b>-0,61</b> | <b>-0,15</b> | <b>0,001</b>     |
| Excl. studies with gastric bypass                        | 57     | 3376 | 0,05        | 19,1%          | 0,111        | <b>-0,38</b> | <b>-0,55</b> | <b>-0,21</b> | <b>&lt;0,001</b> | 66                       | 3889 | <b>0,38</b> | <b>86,5%</b>   | <b>&lt;0,001</b> | <b>-0,33</b> | <b>-0,53</b> | <b>-0,12</b> | <b>0,002</b>     |
| Excl. studies from Iran                                  | 30     | 1741 | 0,05        | 11,7%          | 0,284        | <b>-0,63</b> | <b>-0,89</b> | <b>-0,36</b> | <b>&lt;0,001</b> | 40                       | 2373 | <b>0,44</b> | <b>87,7%</b>   | <b>&lt;0,001</b> | <b>-0,37</b> | <b>-0,66</b> | <b>-0,08</b> | <b>0,012</b>     |
| NW                                                       | 7      | 280  | 0,00        | 0,0%           | 1,000        | 0,17         | -0,38        | 0,72         | 0,539            | 16                       | 712  | 0,00        | 0,0%           | 1,000            | 0,08         | -0,10        | 0,25         | 0,410            |
| OW                                                       | 25     | 1644 | 0,00        | 0,0%           | 0,779        | <b>-0,94</b> | <b>-1,17</b> | <b>-0,70</b> | <b>&lt;0,001</b> | 32                       | 2196 | <b>0,56</b> | <b>91,9%</b>   | <b>&lt;0,001</b> | <b>-0,55</b> | <b>-0,86</b> | <b>-0,23</b> | <b>0,001</b>     |
| OB                                                       | 20     | 1084 | 0,00        | 0,0%           | 0,999        | -0,33        | -0,85        | 0,18         | 0,204            | 16                       | 857  | 0,00        | 0,0%           | 0,795            | 0,03         | -0,13        | 0,19         | 0,719            |
| IFG                                                      | 9      | 393  | 0,00        | 0,0%           | 0,650        | -0,38        | -0,97        | 0,21         | 0,203            | 13                       | 560  | 0,00        | 0,0%           | 0,942            | -0,17        | -0,35        | <0,001       | 0,050            |
| T2DM                                                     | 16     | 943  | 0,00        | 0,0%           | 0,942        | <b>-0,84</b> | <b>-1,20</b> | <b>-0,47</b> | <b>&lt;0,001</b> | 16                       | 952  | <b>0,19</b> | <b>62,6%</b>   | <b>&lt;0,001</b> | -0,31        | -0,68        | 0,06         | 0,100            |
| GDM                                                      | 6      | 375  | <b>0,04</b> | <b>55,8%</b>   | <b>0,046</b> | -0,09        | -0,34        | 0,15         | 0,447            | 3                        | 190  | 0,00        | 0,0%           | 0,825            | 0,03         | -0,11        | 0,16         | 0,715            |
| NAFLD                                                    | 5      | 276  | 0,00        | 0,0%           | 0,967        | <b>-1,83</b> | <b>-3,49</b> | <b>-0,17</b> | <b>0,031</b>     | 11                       | 588  | <b>1,95</b> | <b>88,5%</b>   | <b>&lt;0,001</b> | <b>-1,21</b> | <b>-2,18</b> | <b>-0,24</b> | <b>0,014</b>     |
| <i>Dose &gt; 10<sup>7</sup> &amp; ≤ 10<sup>8</sup></i>   | 2      | 76   | 0,00        | 0,0%           | 0,989        | -0,01        | -5,03        | 5,01         | 0,998            | 2                        | 76   | 0,00        | 0,0%           | 0,798            | 0,08         | -1,58        | 1,74         | 0,927            |
| <i>Dose &gt; 10<sup>8</sup> &amp; ≤ 10<sup>9</sup></i>   | 3      | 245  | 0,00        | 0,0%           | 0,965        | -0,12        | -3,75        | 3,51         | 0,948            | 4                        | 283  | <b>5,58</b> | <b>98,6%</b>   | <b>&lt;0,001</b> | -0,46        | -2,95        | 2,03         | 0,719            |
| <i>Dose &gt; 10<sup>9</sup> &amp; ≤ 10<sup>10</sup></i>  | 25     | 1323 | 0,10        | 33,0%          | 0,057        | -0,24        | -0,51        | 0,03         | 0,080            | 26                       | 1383 | <b>0,18</b> | <b>73,9%</b>   | <b>&lt;0,001</b> | <b>-0,28</b> | <b>-0,52</b> | <b>-0,03</b> | <b>0,026</b>     |
| <i>Dose &gt; 10<sup>10</sup> &amp; ≤ 10<sup>11</sup></i> | 20     | 1300 | 0,00        | 0,0%           | 1,000        | <b>-0,92</b> | <b>-1,27</b> | <b>-0,57</b> | <b>&lt;0,001</b> | 24                       | 1691 | <b>0,06</b> | <b>42,9%</b>   | <b>0,014</b>     | <b>-0,32</b> | <b>-0,52</b> | <b>-0,12</b> | <b>0,002</b>     |
| <i>Dose &gt; 10<sup>11</sup> &amp; ≤ 10<sup>12</sup></i> | 6      | 367  | <b>0,31</b> | <b>75,9%</b>   | <b>0,001</b> | 0,44         | -1,06        | 0,18         | 0,161            | 8                        | 391  | <b>0,31</b> | <b>90,7%</b>   | <b>&lt;0,001</b> | <b>-0,48</b> | <b>-0,96</b> | <b>-0,01</b> | <b>0,045</b>     |
| Pill                                                     | 34     | 2017 | <b>0,09</b> | <b>38,2%</b>   | <b>0,014</b> | -0,38        | -0,60        | <b>-0,17</b> | <b>&lt;0,001</b> | 41                       | 2337 | <b>0,56</b> | <b>91,4%</b>   | <b>&lt;0,001</b> | <b>-0,41</b> | <b>-0,69</b> | <b>-0,12</b> | <b>0,005</b>     |
| FM & Y                                                   | 16     | 937  | 0,14        | 16,8%          | 0,261        | -0,46        | -0,96        | 0,05         | 0,077            | 17                       | 1139 | 0,02        | 23,0%          | 0,187            | <b>-0,24</b> | <b>-0,41</b> | <b>-0,06</b> | <b>0,009</b>     |
| n strains=1                                              | 24     | 1469 | 0,00        | 0,0%           | 0,573        | <b>-0,80</b> | <b>-1,11</b> | <b>-0,49</b> | <b>&lt;0,001</b> | 30                       | 1866 | 0,00        | 2,9%           | 0,420            | <b>-0,26</b> | <b>-0,36</b> | <b>-0,15</b> | <b>&lt;0,001</b> |
| n strains=2                                              | 9      | 446  | 0,00        | 0,0%           | 0,435        | <b>-0,32</b> | <b>-0,61</b> | <b>-0,03</b> | <b>0,033</b>     | 8                        | 443  | 0,00        | 0,0%           | 0,999            | <b>-0,36</b> | <b>-0,57</b> | <b>-0,15</b> | <b>0,001</b>     |
| n strains≥3                                              | 25     | 1507 | 0,06        | 29,4%          | 0,085        | <b>-0,25</b> | <b>-0,47</b> | <b>-0,03</b> | <b>0,029</b>     | 30                       | 1706 | <b>0,71</b> | <b>93,6%</b>   | <b>&lt;0,001</b> | <b>-0,50</b> | <b>-0,87</b> | <b>-0,13</b> | <b>&lt;0,001</b> |

|                    | BW(kg) |      |             |                |                  |              |              |              |                  |     | BMI (kg/m <sup>2</sup> ) |             |                |                  |              |              |              |              |  |  |
|--------------------|--------|------|-------------|----------------|------------------|--------------|--------------|--------------|------------------|-----|--------------------------|-------------|----------------|------------------|--------------|--------------|--------------|--------------|--|--|
|                    | RCT    | n    | $\tau^2$    | I <sup>2</sup> | P(het)           | E            | lb           | ub           | P                | RCT | n                        | $\tau^2$    | I <sup>2</sup> | P(het)           | E            | lb           | ub           | P            |  |  |
| <i>B. bif.</i>     | 15     | 891  | 0,07        | 27,9%          | 0,150            | <b>-0,90</b> | <b>-1,17</b> | <b>-0,63</b> | <b>&lt;0,001</b> | 15  | 914                      | <b>0,13</b> | <b>79,1%</b>   | <b>&lt;0,001</b> | -0,11        | -0,35        | 0,14         | 0,403        |  |  |
| <i>B. brev.</i>    | 8      | 462  | 0,30        | 31,9%          | 0,173            | -0,76        | -1,53        | 0,01         | 0,055            | 14  | 702                      | <b>1,38</b> | <b>92,4%</b>   | <b>&lt;0,001</b> | <b>-0,75</b> | <b>-1,45</b> | <b>-0,04</b> | <b>0,039</b> |  |  |
| <i>B. lac.</i>     | 17     | 1208 | 0,00        | 0,0%           | 0,727            | <b>-0,32</b> | <b>-0,46</b> | <b>-0,18</b> | <b>&lt;0,001</b> | 16  | 945                      | <b>0,59</b> | <b>84,3%</b>   | <b>&lt;0,001</b> | -0,51        | -1,04        | 0,02         | 0,058        |  |  |
| <i>B. lon.</i>     | 10     | 565  | 0,00        | 0,0%           | 0,842            | <b>-1,20</b> | <b>-1,70</b> | <b>-0,70</b> | <b>&lt;0,001</b> | 16  | 889                      | <b>2,00</b> | <b>94,7%</b>   | <b>&lt;0,001</b> | <b>-0,86</b> | <b>-1,67</b> | <b>-0,05</b> | <b>0,037</b> |  |  |
| <i>S. ther.</i>    | 11     | 589  | 0,03        | 20,6%          | 0,247            | <b>-0,40</b> | <b>-0,67</b> | <b>-0,13</b> | <b>0,004</b>     | 16  | 810                      | <b>2,31</b> | <b>95,9%</b>   | <b>&lt;0,001</b> | <b>-0,86</b> | <b>-1,70</b> | <b>-0,03</b> | <b>0,043</b> |  |  |
| <i>Lc. lac.</i>    | 2      | 121  | 0,00        | 0,0%           | 0,887            | -0,41        | -5,00        | 4,18         | 0,860            | 3   | 201                      | 0,00        | 0,0%           | 0,840            | 0,34         | -0,59        | 1,28         | 0,474        |  |  |
| <i>L. hel.</i>     | 2      | 113  | 0,00        | 0,0%           | 0,945            | <b>-0,20</b> | <b>-0,36</b> | <b>-0,04</b> | <b>0,017</b>     | 6   | 204                      | <b>2,46</b> | <b>91,5%</b>   | <b>&lt;0,001</b> | -0,72        | -2,36        | 0,91         | 0,385        |  |  |
| <i>L. acid.</i>    | 31     | 1802 | 0,02        | 14,3%          | 0,242            | <b>-0,22</b> | <b>-0,39</b> | <b>-0,05</b> | <b>0,010</b>     | 33  | 1839                     | <b>0,36</b> | <b>86,5%</b>   | <b>&lt;0,001</b> | <b>-0,36</b> | <b>-0,63</b> | <b>-0,08</b> | <b>0,013</b> |  |  |
| <i>L. del.</i>     | 10     | 606  | 0,05        | 9,3%           | 0,357            | <b>-0,83</b> | <b>-1,25</b> | <b>-0,41</b> | <b>&lt;0,001</b> | 14  | 794                      | <b>2,46</b> | <b>95,2%</b>   | <b>&lt;0,001</b> | <b>-0,97</b> | <b>-1,93</b> | <b>-0,02</b> | <b>0,046</b> |  |  |
| <i>L. gas.</i>     | 3      | 189  | <b>0,87</b> | <b>87,8%</b>   | <b>&lt;0,001</b> | -0,69        | -1,84        | 0,46         | 0,240            | 4   | 328                      | <b>0,07</b> | <b>84,4%</b>   | <b>&lt;0,001</b> | -0,26        | -0,56        | 0,04         | 0,086        |  |  |
| <i>L. reut.</i>    | 3      | 90   | 0,00        | 0,0%           | 0,999            | -1,17        | -2,43        | 0,09         | 0,070            | 2   | 69                       | 0,00        | 0,0%           | 0,962            | -0,37        | -0,86        | 0,13         | 0,145        |  |  |
| <i>L. fer.</i>     | 4      | 208  | 0,00        | 0,0%           | 0,985            | -0,29        | -0,90        | 0,32         | 0,350            | 3   | 180                      | 0,00        | 0,0%           | 0,969            | -0,11        | -0,34        | 0,12         | 0,338        |  |  |
| <i>L. rham.</i>    | 8      | 467  | 0,00        | 0,0%           | 0,518            | <b>-0,93</b> | <b>-1,61</b> | <b>-0,25</b> | <b>0,008</b>     | 12  | 670                      | <b>3,23</b> | <b>96,1%</b>   | <b>&lt;0,001</b> | -0,86        | -1,97        | 0,24         | 0,125        |  |  |
| <i>L. cas. gr.</i> | 25     | 1483 | <b>0,12</b> | <b>37,7%</b>   | <b>0,031</b>     | -0,27        | -0,56        | 0,01         | 0,059            | 33  | 1867                     | <b>0,69</b> | <b>93,1%</b>   | <b>&lt;0,001</b> | <b>-0,46</b> | <b>-0,81</b> | <b>-0,12</b> | <b>0,009</b> |  |  |
| <i>L. cur.</i>     |        |      |             |                |                  |              |              |              |                  | 2   | 187                      | 0,00        | 0,0%           | 0,619            | <b>-0,37</b> | <b>-0,59</b> | <b>-0,15</b> | <b>0,001</b> |  |  |
| <i>L. sal.</i>     | 2      | 178  | 0,00        | 0,0%           | 0,953            | -0,59        | -5,44        | 4,25         | 0,811            | 3   | 208                      | 0,00        | 0,0%           | 0,922            | 0,12         | -0,83        | 1,06         | 0,812        |  |  |
| <i>L. plan.</i>    | 7      | 355  | 0,11        | 32,0%          | 0,184            | <b>-0,56</b> | <b>-1,04</b> | <b>-0,08</b> | <b>0,022</b>     | 14  | 824                      | <b>0,37</b> | <b>79,8%</b>   | <b>&lt;0,001</b> | -0,32        | -0,78        | 0,14         | 0,171        |  |  |

Heading: RCT, number of trials; n, number of subjects;  $\tau^2$ , between-study variance; I<sup>2</sup>, heterogeneity measure; P(het), P value of heterogeneity test relating on I<sup>2</sup> measure; E, estimate; lb, lower boundary of 95% confidence interval; ub, upper boundary of confidence interval; P value of Wald test.

Outcome: BW, Body weight; BMI, Body mass index.

Population: NW, normal weight; OW, overweight; OB, obese; IFG, impaired fasting glucose; T2DM, type 2 diabetes mellitus; GDM, gestational diabetes; NAFLD, nonalcoholic fatty liver disease.

Food form: FM & Y, fermented milk or yogurt.

Species: *B. bif.*, *Bifidobacterium bifidum*; *B. brev.*, *Bifidobacterium breve*; *B. lac.*, *Bifidobacterium animalis* subsp. *lactis*; *B. lon.*, *Bifidobacterium longum*; *S. ther.*, *Streptococcus salivarius* subsp. *thermophilus*; *Lc. lac.*, *Lactococcus lactis*; *L. hel.*, *Lactobacillus helveticus*; *L. acid.*, *Lactobacillus acidophilus*; *L. del.*, *Lactobacillus delbrueckii*; *L. gas.*, *Lactobacillus gasseri*; *L. reut.*, *Lactobacillus reuteri*; *L. fer.*, *Lactobacillus fermentum*; *L. rham.*, *Lactobacillus rhamnosus*; *L. cas. gr.*, *Lactobacillus casei* or *paracasei*; *L. cur.*, *Lactobacillus curvatus*; *L. sal.*, *Lactobacillus salivarius*; *L. plan.*, *Lactobacillus plantarum*.

**Supplementary Table 5. Effect of probiotics on waist circumference and body fat mass. Subgroup analysis by study quality, study populations, daily dose (in CFU), food form, number of strains, species and subspecies.**

|                                                          | WC (cm) |      |             |                |                  |              |              |              |                  | BFM (kg)  |             |             |                |                  |              |              |              |                  |
|----------------------------------------------------------|---------|------|-------------|----------------|------------------|--------------|--------------|--------------|------------------|-----------|-------------|-------------|----------------|------------------|--------------|--------------|--------------|------------------|
|                                                          | RCT     | n    | $\tau^2$    | I <sup>2</sup> | P(het)           | E            | lb           | ub           | P                | RCT       | n           | $\tau^2$    | I <sup>2</sup> | P(het)           | E            | lb           | ub           | P                |
| All studies                                              | 26      | 1583 | 0,43        | <b>35,6%</b>   | <b>0,039</b>     | <b>-1,01</b> | <b>-1,55</b> | <b>-0,48</b> | <b>&lt;0,001</b> | 27        | 1562        | 0,15        | 16,3%          | 0,230            | <b>-0,62</b> | <b>-0,91</b> | <b>-0,34</b> | <b>&lt;0,001</b> |
| Excl. low quality studies                                | 22      | 1432 | 0,00        | 0,0%           | 0,732            | <b>-1,47</b> | <b>-1,80</b> | <b>-1,14</b> | <b>&lt;0,001</b> | 22        | 1323        | 0,15        | 31,0%          | 0,079            | <b>-0,59</b> | <b>-0,93</b> | <b>-0,25</b> | <b>0,001</b>     |
| Excl. low/medium quality studies                         | 17      | 1150 | 0,00        | 0,0%           | 0,631            | <b>-1,45</b> | <b>-1,80</b> | <b>-1,11</b> | <b>&lt;0,001</b> | <b>16</b> | <b>1032</b> | <b>0,27</b> | <b>45,1%</b>   | <b>0,023</b>     | <b>-0,46</b> | <b>-0,91</b> | <b>0,00</b>  | <b>0,048</b>     |
| Excl. studies with children                              | 22      | 1344 | <b>0,41</b> | <b>37,3%</b>   | <b>0,041</b>     | <b>-1,07</b> | <b>-1,63</b> | <b>-0,52</b> | <b>&lt;0,001</b> | 25        | 1443        | 0,09        | 19,2%          | 0,191            | <b>-0,65</b> | <b>-0,95</b> | <b>-0,35</b> | <b>&lt;0,001</b> |
| Excl. studies with pregnant women                        | 26      | 1583 | <b>0,43</b> | <b>35,6%</b>   | <b>0,039</b>     | <b>-1,01</b> | <b>-1,55</b> | <b>-0,48</b> | <b>&lt;0,001</b> | 27        | 1562        | 0,08        | 16,3%          | 0,223            | <b>-0,62</b> | <b>-0,91</b> | <b>0,34</b>  | <b>&lt;0,001</b> |
| Excl. studies with gastric bypass                        | 25      | 1537 | <b>0,40</b> | <b>34,7%</b>   | <b>0,046</b>     | <b>-0,98</b> | <b>-1,51</b> | <b>-0,45</b> | <b>&lt;0,001</b> | 27        | 1562        | 0,08        | 16,3%          | 0,223            | <b>-0,62</b> | <b>-0,91</b> | <b>0,34</b>  | <b>&lt;0,001</b> |
| Excl. studies from Iran                                  | 16      | 1016 | <b>0,73</b> | <b>55,4%</b>   | <b>0,004</b>     | <b>-0,79</b> | <b>-1,52</b> | <b>-0,07</b> | <b>0,033</b>     | 24        | 1382        | 0,12        | 24,9%          | 0,129            | <b>-0,60</b> | <b>-0,92</b> | <b>-0,28</b> | <b>0,001</b>     |
| NW                                                       |         |      |             |                |                  |              |              |              |                  | 3         | 103         | 0,00        | 0,0%           | 0,992            | -1,11        | -3,41        | 1,20         | 0,347            |
| OW                                                       | 13      | 771  | 0,16        | 26,2%          | 0,180            | <b>-1,31</b> | <b>-1,79</b> | <b>-0,83</b> | <b>&lt;0,001</b> | 11        | 784         | 0,00        | 0,0%           | 0,968            | <b>-0,96</b> | <b>-1,21</b> | <b>-0,71</b> | <b>&lt;0,001</b> |
| OB                                                       | 12      | 772  | 0,00        | 0,0%           | 0,630            | -0,77        | -2,05        | 0,52         | 0,243            | 14        | 696         | 0,00        | 0,0%           | 0,989            | 0,38         | -0,09        | 0,85         | 0,111            |
| IFG                                                      | 5       | 203  | 0,00        | 0,0%           | 0,557            | <b>-2,24</b> | <b>-3,55</b> | <b>-0,94</b> | <b>0,001</b>     | 5         | 271         | 0,00        | 0,0%           | 0,757            | <b>-0,71</b> | <b>-1,22</b> | <b>-0,20</b> | <b>0,006</b>     |
| T2DM                                                     | 4       | 150  | 0,00        | 0,0%           | 0,841            | -1,21        | -2,51        | -0,10        | 0,069            | 3         | 113         | 0,00        | 0,0%           | 0,989            | -0,47        | -2,51        | 1,57         | 0,650            |
| NAFLD                                                    | 4       | 246  | 0,00        | 0,0%           | 0,659            | <b>-1,81</b> | <b>-3,20</b> | <b>-0,43</b> | <b>0,010</b>     | 3         | 168         | 0,00        | 0,0%           | 0,979            | -0,86        | -2,15        | 0,43         | 0,191            |
| <i>Dose &gt; 10<sup>8</sup> &amp; ≤ 10<sup>9</sup></i>   |         |      |             |                |                  |              |              |              |                  | 2         | 121         | 0,00        | 0,0%           | 0,841            | -0,54        | -6,11        | 5,02         | 0,848            |
| <i>Dose &gt; 10<sup>9</sup> &amp; ≤ 10<sup>10</sup></i>  | 9       | 471  | 0,00        | 0,0%           | 0,857            | <b>-1,60</b> | <b>-2,53</b> | <b>-0,68</b> | <b>0,001</b>     | 4         | 176         | 0,00        | 0,0%           | 0,996            | -0,84        | -2,23        | 0,56         | 0,239            |
| <i>Dose &gt; 10<sup>10</sup> &amp; ≤ 10<sup>11</sup></i> | 11      | 828  | 0,23        | 18,1%          | 0,272            | <b>-0,92</b> | <b>-1,63</b> | <b>-0,21</b> | <b>0,011</b>     | 15        | 950         | 0,00        | 0,0%           | 0,898            | <b>-0,92</b> | <b>-1,21</b> | <b>-0,63</b> | <b>&lt;0,001</b> |
| <i>Dose &gt; 10<sup>11</sup> &amp; ≤ 10<sup>12</sup></i> | 4       | 187  | <b>2,72</b> | <b>85,2%</b>   | <b>&lt;0,001</b> | -0,30        | -2,19        | 1,59         | 0,754            | 6         | 315         | <b>0,53</b> | <b>71,3%</b>   | <b>0,004</b>     | -0,29        | -1,07        | 0,49         | 0,463            |
| Pill                                                     | 14      | 741  | 0,78        | 35,7%          | 0,090            | <b>-1,15</b> | <b>-1,99</b> | <b>-0,30</b> | <b>0,008</b>     | 16        | 833         | 0,00        | 0,0%           | 1,000            | <b>-0,84</b> | <b>-1,21</b> | <b>-0,49</b> | <b>&lt;0,001</b> |
| FM & Y                                                   | 10      | 633  | 0,45        | 46,4%          | 0,052            | -0,78        | -1,60        | 0,05         | 0,065            | 8         | 480         | <b>0,59</b> | <b>74,7%</b>   | <b>&lt;0,001</b> | -0,33        | -1,08        | 0,41         | 0,380            |
| 1 species                                                | 13      | 863  | <b>0,42</b> | <b>44,7%</b>   | <b>0,041</b>     | <b>-1,16</b> | <b>-1,82</b> | <b>-0,51</b> | <b>0,001</b>     | 15        | 1021        | 0,00        | 0,0%           | 0,998            | <b>-0,95</b> | <b>-1,22</b> | <b>-0,67</b> | <b>&lt;0,001</b> |
| 2 species                                                | 3       | 207  | 0,00        | 0,0%           | 0,996            | -0,45        | -2,43        | 1,52         | 0,655            | 5         | 221         | <b>0,70</b> | <b>72,6%</b>   | <b>0,006</b>     | -0,02        | -1,03        | 0,99         | 0,967            |
| 3 or more species                                        | 10      | 513  | 1,18        | 37,0%          | 0,113            | -0,82        | -2,06        | 0,43         | 0,198            | 7         | 320         | 0,00        | 0,0%           | 0,986            | -0,78        | -1,67        | 0,11         | 0,086            |

|                    | WC (cm) |     |             |                |                  |              |              |              |              | BFM (kg) |     |          |                |        |              |              |              |                  |
|--------------------|---------|-----|-------------|----------------|------------------|--------------|--------------|--------------|--------------|----------|-----|----------|----------------|--------|--------------|--------------|--------------|------------------|
|                    | RCT     | n   | $\tau^2$    | I <sup>2</sup> | P(het)           | E            | lb           | ub           | P            | RCT      | n   | $\tau^2$ | I <sup>2</sup> | P(het) | E            | lb           | ub           | P                |
| <i>B. bif.</i>     | 2       | 107 | 0,00        | 0,0%           | 0,743            | -1,19        | -5,13        | 2,75         | 0,553        | 3        | 125 | 0,00     | 0,0%           | 0,992  | -1,01        | -3,57        | 1,55         | 0,439            |
| <i>B. brev.</i>    | 6       | 267 | <b>2,44</b> | <b>64,5%</b>   | <b>0,015</b>     | -0,83        | -2,57        | 0,90         | 0,347        | 5        | 239 | 0,00     | 0,0%           | 0,946  | -0,73        | -1,63        | 0,16         | 0,109            |
| <i>B. lac.</i>     | 11      | 673 | 0,00        | 0,0%           | 0,711            | -0,06        | -0,93        | 0,82         | 0,895        | 8        | 429 | 0,00     | 0,00%          | 0,993  | -0,75        | -1,71        | 0,21         | 0,126            |
| <i>B. lon.</i>     | 5       | 248 | <b>1,89</b> | <b>62,2%</b>   | <b>0,032</b>     | -1,27        | -2,95        | 0,40         | 0,135        | 5        | 258 | 0,00     | 0,00%          | 1,000  | -0,89        | -1,81        | 0,03         | 0,058            |
| <i>S. ther.</i>    | 7       | 356 | <b>1,98</b> | <b>57,4%</b>   | <b>0,029</b>     | -0,78        | -2,30        | 0,75         | 0,318        | 6        | 221 | 0,10     | 16,20%         | 0,310  | 0,19         | -0,41        | 0,78         | 0,545            |
| <i>L. hel.</i>     | 2       | 60  | 0,00        | 0,0%           | 0,574            | 3,03         | -0,88        | 6,94         | 0,129        |          |     |          |                |        |              |              |              |                  |
| <i>L. acid.</i>    | 12      | 625 | 0,69        | 23,1%          | 0,216            | -0,77        | -1,84        | 0,29         | 0,154        | 9        | 390 | 0,00     | 0,00%          | 0,877  | -0,32        | -1,02        | 0,38         | 0,370            |
| <i>L. del.</i>     | 5       | 301 | 0,00        | 0,0%           | 0,535            | <b>-1,90</b> | <b>-3,05</b> | <b>-0,75</b> | <b>0,001</b> | 4        | 190 | 0,00     | 0,00%          | 0,995  | -0,90        | -2,20        | 0,39         | 0,172            |
| <i>L. gas.</i>     | 4       | 328 | <b>0,89</b> | <b>83,6%</b>   | <b>&lt;0,001</b> | <b>-1,10</b> | <b>-2,18</b> | <b>-0,02</b> | <b>0,046</b> | 3        | 288 | 0,00     | 0,00%          | 0,765  | <b>-1,11</b> | <b>-1,44</b> | <b>-0,78</b> | <b>&lt;0,001</b> |
| <i>L. reut.</i>    |         |     |             |                |                  |              |              |              |              | 2        | 50  | 0,00     | 0,00%          | 0,670  | -0,80        | -4,82        | 3,23         | 0,698            |
| <i>L. rham.</i>    | 6       | 312 | 1,54        | 52,8%          | 0,060            | -1,20        | -2,71        | 0,32         | 0,122        | 5        | 297 | 0,37     | 38,00%         | 0,168  | -0,21        | -1,10        | 0,69         | 0,652            |
| <i>L. cas. gr.</i> | 8       | 364 | 0,29        | 12,9%          | 0,329            | <b>-1,53</b> | <b>-2,57</b> | <b>-0,50</b> | <b>0,004</b> | 7        | 384 | 0,00     | 0,00%          | 0,971  | -0,46        | -1,24        | 0,32         | 0,245            |
| <i>L. plan.</i>    | 4       | 174 | 0,00        | 0,0%           | 0,447            | 0,32         | -0,66        | 1,31         | 0,519        | 4        | 190 | 0,00     | 0,00%          | 0,830  | <b>-0,90</b> | <b>-1,44</b> | <b>-0,36</b> | <b>0,001</b>     |

Heading: RCT, number of trials; n, number of subjects;  $\tau^2$ , between-study variance; I<sup>2</sup>, heterogeneity measure; P(het), P value of heterogeneity test relating on I<sup>2</sup> measure; E, estimate; lb, lower boundary of 95% confidence interval; ub, upper boundary of confidence interval; P value of Wald test.

Outcome: WC, Waist circumference; BFM, Body fat mass.

Population: NW, normal weight; OW, overweight; OB, obese; IFG, impaired fasting glucose; T2DM, type 2 diabetes mellitus; NAFLD, nonalcoholic fatty liver disease.

Food form: FM & Y, fermented milk or yogurt.

Species: *B. bif.*, *Bifidobacterium bifidum*; *B. brev.*, *Bifidobacterium breve*; *B. lac.*, *Bifidobacterium animalis* subsp. *lactis*; *B. lon.*, *Bifidobacterium longum*; *S. ther.*, *Streptococcus salivarius* subsp. *thermophilus*; *L. hel.*, *Lactobacillus helveticus*; *L. acid.*, *Lactobacillus acidophilus*; *L. del.*, *Lactobacillus delbrueckii*; *L. gas.*, *Lactobacillus gasseri*; *L. reut.*, *Lactobacillus reuteri*; *L. rham.*, *Lactobacillus rhamnosus*; *L. cas. gr.*, *Lactobacillus casei* or *paracasei*; *L. plan.*, *Lactobacillus plantarum*.

**Supplementary Table 6. Effect of probiotics on visceral and subcutaneous adipose tissues. Subgroup analysis by study quality, study populations, daily dose (in CFU), food form, number of strains and species.**

|                                                          | VAT (cm <sup>2</sup> ) |     |          |                |        |              |               |              |                  | SAT (cm <sup>2</sup> ) |     |             |                |              |              |               |              |                  |
|----------------------------------------------------------|------------------------|-----|----------|----------------|--------|--------------|---------------|--------------|------------------|------------------------|-----|-------------|----------------|--------------|--------------|---------------|--------------|------------------|
|                                                          | RCT                    | n   | $\tau^2$ | I <sup>2</sup> | P(het) | E            | lb            | ub           | P                | RCT                    | n   | $\tau^2$    | I <sup>2</sup> | P(het)       | E            | lb            | ub           | P                |
| All studies                                              | 5                      | 543 | 0,00     | 0,0%           | 0,538  | <b>-6,30</b> | <b>-9,05</b>  | <b>-3,56</b> | <b>&lt;0,001</b> | 5                      | 543 | 0,00        | 0,0%           | 0,620        | <b>-4,99</b> | <b>-7,55</b>  | <b>-2,44</b> | <b>&lt;0,001</b> |
| Excl. low quality studies                                | 5                      | 543 | 0,00     | 0,0%           | 0,538  | <b>-6,30</b> | <b>-9,05</b>  | <b>-3,56</b> | <b>&lt;0,001</b> | 3                      | 386 | 0,00        | 14,8%          | 0,309        | <b>-4,48</b> | <b>-8,00</b>  | <b>-0,95</b> | <b>0,013</b>     |
| Excl. low/medium quality studies                         | 3                      | 386 | 0,00     | 0,0%           | 0,789  | <b>-7,48</b> | <b>-10,67</b> | <b>-4,29</b> | <b>&lt;0,001</b> | 4                      | 405 | <b>1,53</b> | <b>70,4%</b>   | <b>0,017</b> | -2,70        | -6,47         | 1,07         | 0,160            |
| Excl. studies with children                              | 5                      | 543 | 0,00     | 0,0%           | 0,538  | <b>-6,30</b> | <b>-9,05</b>  | <b>-3,56</b> | <b>&lt;0,001</b> | 5                      | 543 | 0,00        | 0,0%           | 0,620        | <b>-4,99</b> | <b>-7,55</b>  | <b>-2,44</b> | <b>&lt;0,001</b> |
| Excl. studies with pregnant women                        | 5                      | 543 | 0,00     | 0,0%           | 0,538  | <b>-6,30</b> | <b>-9,05</b>  | <b>-3,56</b> | <b>&lt;0,001</b> | 5                      | 543 | 0,00        | 0,0%           | 0,620        | <b>-4,99</b> | <b>-7,55</b>  | <b>-2,44</b> | <b>&lt;0,001</b> |
| Excl. studies with gastric bypass                        | 5                      | 543 | 0,00     | 0,0%           | 0,538  | <b>-6,30</b> | <b>-9,05</b>  | <b>-3,56</b> | <b>&lt;0,001</b> | 5                      | 543 | 0,00        | 0,0%           | 0,620        | <b>-4,99</b> | <b>-7,55</b>  | <b>-2,44</b> | <b>&lt;0,001</b> |
| Excl. studies from Iran                                  | 5                      | 543 | 0,00     | 0,0%           | 0,538  | <b>-6,30</b> | <b>-9,05</b>  | <b>-3,56</b> | <b>&lt;0,001</b> | 5                      | 543 | 0,00        | 0,0%           | 0,620        | <b>-4,99</b> | <b>-7,55</b>  | <b>-2,44</b> | <b>&lt;0,001</b> |
| OW                                                       | 5                      | 543 | 0,00     | 0,0%           | 0,538  | <b>-6,30</b> | <b>-9,05</b>  | <b>-3,56</b> | <b>&lt;0,001</b> | 5                      | 543 | 0,00        | 0,0%           | 0,620        | <b>-4,99</b> | <b>-7,55</b>  | <b>-2,44</b> | <b>&lt;0,001</b> |
| <i>Dose &gt; 10<sup>10</sup> &amp; ≤ 10<sup>11</sup></i> | 4                      | 456 | 0,13     | 1,3%           | 0,386  | <b>-6,12</b> | <b>-9,15</b>  | <b>-3,10</b> | <b>&lt;0,001</b> | 4                      | 456 | 0,00        | 0,0%           | 0,517        | <b>-4,44</b> | <b>-7,57</b>  | <b>-1,32</b> | <b>0,005</b>     |
| Pill                                                     | 2                      | 157 | 0,00     | 0,0%           | 0,409  | -2,95        | -8,34         | 2,45         | 0,284            | 2                      | 157 | 0,00        | 0,0%           | 0,835        | <b>-5,86</b> | <b>-10,13</b> | <b>-1,59</b> | <b>0,007</b>     |
| FM & Y                                                   | 3                      | 386 | 0,00     | 0,0%           | 0,789  | <b>-7,48</b> | <b>-10,67</b> | <b>-4,29</b> | <b>&lt;0,001</b> | 3                      | 386 | <b>1,53</b> | <b>14,8%</b>   | <b>0,309</b> | <b>-4,48</b> | <b>-8,00</b>  | <b>-0,95</b> | <b>0,013</b>     |
| n strains=1                                              | 4                      | 448 | 0,00     | 0,0%           | 0,420  | <b>-6,64</b> | <b>-9,65</b>  | <b>-3,64</b> | <b>&lt;0,001</b> | 4                      | 448 | 0,00        | 0,0%           | 0,503        | <b>-4,50</b> | <b>-7,63</b>  | <b>-1,36</b> | <b>0,005</b>     |
| <i>L. gas.</i>                                           | 3                      | 288 | 5,46     | 29,0%          | 0,244  | <b>-6,37</b> | <b>-11,25</b> | <b>-1,50</b> | <b>0,010</b>     | 3                      | 288 | 0,00        | 0,0%           | 0,961        | <b>-6,16</b> | <b>-9,97</b>  | <b>-2,35</b> | <b>0,002</b>     |

Heading: RCT, number of trials; n, number of subjects;  $\tau^2$ , between-study variance; I<sup>2</sup>, heterogeneity measure; P(het), P value of heterogeneity test relating on I<sup>2</sup> measure; E, estimate; lb, lower boundary of 95% confidence interval; ub, upper boundary of confidence interval; P value of Wald test.

Outcome: VAT, visceral adipose tissue; SAT, subcutaneous adipose tissue.

Population: OW, overweight.

Food form: FM & Y, fermented milk or yogurt.

Species: *L. gas.*, *Lactobacillus gasseri*.

**Supplementary Table 7. Effect of probiotics on fasting glucose and glycated haemoglobin. Subgroup analysis by study quality, study populations, daily dose (in CFU), food form, number of strains, species and subspecies.**

|                                                          | FG (mmol/l)) |      |             |                |                  |              |              |              |                  | HbA <sub>1c</sub> (%) |      |             |                |                  |              |              |              |                  |
|----------------------------------------------------------|--------------|------|-------------|----------------|------------------|--------------|--------------|--------------|------------------|-----------------------|------|-------------|----------------|------------------|--------------|--------------|--------------|------------------|
|                                                          | RCT          | n    | $\tau^2$    | I <sup>2</sup> | P(het)           | E            | lb           | ub           | P                | RCT                   | n    | $\tau^2$    | I <sup>2</sup> | P(het)           | E            | lb           | ub           | P                |
| All studies                                              | 83           | 5188 | <b>0,02</b> | <b>55,4%</b>   | <b>&lt;0,001</b> | <b>-0,12</b> | <b>-0,18</b> | <b>-0,07</b> | <b>&lt;0,001</b> | 28                    | 1796 | <b>0,03</b> | <b>81,3%</b>   | <b>&lt;0,001</b> | <b>-0,14</b> | <b>-0,22</b> | <b>-0,06</b> | <b>&lt;0,001</b> |
| Excl. low quality studies                                | 68           | 4416 | <b>0,03</b> | <b>61,7%</b>   | <b>&lt;0,001</b> | <b>-0,14</b> | <b>-0,20</b> | <b>-0,08</b> | <b>&lt;0,001</b> | 25                    | 1667 | <b>0,02</b> | <b>75,1%</b>   | <b>&lt;0,001</b> | <b>-0,17</b> | <b>-0,26</b> | <b>-0,90</b> | <b>&lt;0,001</b> |
| Excl. low/medium quality studies                         | 56           | 3611 | <b>0,03</b> | <b>64,7%</b>   | <b>&lt;0,001</b> | <b>-0,14</b> | <b>-0,21</b> | <b>-0,07</b> | <b>&lt;0,001</b> | 20                    | 1438 | <b>0,02</b> | <b>76,2%</b>   | <b>&lt;0,001</b> | <b>-0,19</b> | <b>-0,27</b> | <b>-0,10</b> | <b>&lt;0,001</b> |
| Excl. studies with children                              | 81           | 5032 | <b>0,03</b> | <b>56,5%</b>   | <b>&lt;0,001</b> | <b>-0,13</b> | <b>-0,18</b> | <b>-0,07</b> | <b>&lt;0,001</b> | 28                    | 1796 | <b>0,03</b> | <b>81,3%</b>   | <b>&lt;0,001</b> | <b>-0,14</b> | <b>-0,22</b> | <b>-0,06</b> | <b>0,001</b>     |
| Excl. studies with pregnant women                        | 71           | 4103 | <b>0,02</b> | <b>51,0%</b>   | <b>&lt;0,001</b> | <b>-0,12</b> | <b>-0,18</b> | <b>-0,06</b> | <b>&lt;0,001</b> | 26                    | 1553 | <b>0,04</b> | <b>81,6%</b>   | <b>&lt;0,001</b> | <b>-0,15</b> | <b>-0,25</b> | <b>-0,06</b> | <b>0,002</b>     |
| Excl. studies with gastric bypass                        | 81           | 5062 | <b>0,02</b> | <b>56,5%</b>   | <b>&lt;0,001</b> | <b>-0,12</b> | <b>-0,18</b> | <b>-0,07</b> | <b>&lt;0,001</b> | 27                    | 1716 | <b>0,03</b> | <b>82,0%</b>   | <b>&lt;0,001</b> | <b>-0,14</b> | <b>-0,23</b> | <b>-0,06</b> | <b>0,001</b>     |
| Excl. studies from Iran                                  | 48           | 3178 | 0,00        | 19,4%          | 0,125            | -0,04        | -0,09        | 0,00         | 0,062            | 18                    | 1209 | <b>0,03</b> | <b>83,1%</b>   | <b>&lt;0,001</b> | -0,08        | -0,17        | 0,01         | 0,095            |
| NW                                                       | 16           | 660  | 0,00        | 8,0%           | 0,362            | <b>-0,12</b> | <b>-0,20</b> | <b>-0,04</b> | <b>0,004</b>     | 3                     | 129  | 0,00        | 0,0%           | 0,616            | <b>0,10</b>  | <b>0,04</b>  | <b>0,16</b>  | <b>0,001</b>     |
| OW                                                       | 32           | 1994 | <b>0,04</b> | <b>61,2%</b>   | <b>&lt;0,001</b> | <b>-0,22</b> | <b>-0,34</b> | <b>-0,10</b> | <b>&lt;0,001</b> | 14                    | 851  | <b>0,03</b> | <b>72,1%</b>   | <b>&lt;0,001</b> | <b>-0,18</b> | <b>-0,31</b> | <b>-0,05</b> | <b>0,007</b>     |
| OB                                                       | 23           | 1449 | 0,01        | 27,6%          | 0,110            | 0,01         | -0,07        | 0,09         | 0,829            | 9                     | 573  | 0,01        | 39,4%          | 0,105            | <b>-0,24</b> | <b>-0,33</b> | <b>-0,15</b> | <b>&lt;0,001</b> |
| IFG                                                      | 18           | 868  | <b>0,06</b> | <b>73,3%</b>   | <b>&lt;0,001</b> | -0,09        | -0,23        | 0,06         | 0,257            | 6                     | 439  | <b>0,03</b> | <b>89,7%</b>   | <b>&lt;0,001</b> | <b>-0,15</b> | <b>-0,31</b> | <b>0,00</b>  | <b>0,048</b>     |
| T2DM                                                     | 19           | 1103 | 0,15        | 27,7%          | 0,127            | <b>-0,66</b> | <b>-1,00</b> | <b>-0,31</b> | <b>&lt;0,001</b> | 13                    | 713  | <b>0,05</b> | <b>54,1%</b>   | <b>0,010</b>     | <b>-0,28</b> | <b>-0,46</b> | <b>-0,11</b> | <b>0,002</b>     |
| GDM                                                      | 7            | 475  | <b>0,06</b> | <b>84,6%</b>   | <b>&lt;0,001</b> | -0,18        | -0,39        | 0,02         | 0,073            |                       |      |             |                |                  |              |              |              |                  |
| NAFLD                                                    | 12           | 660  | <b>0,09</b> | <b>68,5%</b>   | <b>&lt;0,001</b> | <b>-0,30</b> | <b>-0,52</b> | <b>-0,08</b> | <b>0,008</b>     | 2                     | 122  | 0,00        | 0,0%           | 0,541            | -0,17        | -0,39        | 0,06         | 0,150            |
| <i>Dose &gt; 10<sup>7</sup> &amp; ≤ 10<sup>8</sup></i>   | 2            | 76   | 0,00        | 0,0%           | 0,906            | -0,14        | -0,41        | 0,13         | 0,311            |                       |      |             |                |                  |              |              |              |                  |
| <i>Dose &gt; 10<sup>8</sup> &amp; ≤ 10<sup>9</sup></i>   | 7            | 466  | 0,00        | 0,0%           | 0,662            | -0,05        | -0,15        | 0,05         | 0,296            |                       |      |             |                |                  |              |              |              |                  |
| <i>Dose &gt; 10<sup>9</sup> &amp; ≤ 10<sup>10</sup></i>  | 35           | 2080 | <b>0,05</b> | <b>70,7%</b>   | <b>&lt;0,001</b> | <b>-0,18</b> | <b>-0,28</b> | <b>-0,09</b> | <b>&lt;0,001</b> | 10                    | 590  | <b>0,01</b> | <b>53,5%</b>   | <b>0,022</b>     | <b>-0,26</b> | <b>-0,37</b> | <b>-0,16</b> | <b>&lt;0,001</b> |
| <i>Dose &gt; 10<sup>10</sup> &amp; ≤ 10<sup>11</sup></i> | 24           | 1874 | 0,00        | 4,6%           | 0,397            | -0,04        | -0,10        | 0,02         | 0,154            | 11                    | 755  | 0,01        | 35,5%          | 0,114            | -0,03        | -0,13        | 0,07         | 0,514            |
| <i>Dose &gt; 10<sup>11</sup> &amp; ≤ 10<sup>12</sup></i> | 10           | 442  | <b>0,03</b> | <b>69,9%</b>   | <b>&lt;0,001</b> | -0,12        | -0,28        | 0,03         | 0,128            | 5                     | 340  | <b>0,01</b> | <b>85,1%</b>   | <b>&lt;0,001</b> | -0,02        | -0,14        | 0,10         | 0,769            |
| Pill                                                     | 50           | 3298 | <b>0,04</b> | <b>65,8%</b>   | <b>&lt;0,001</b> | <b>-0,18</b> | <b>-0,25</b> | <b>-0,10</b> | <b>&lt;0,001</b> | 16                    | 1057 | <b>0,02</b> | <b>74,0%</b>   | <b>&lt;0,001</b> | <b>-0,15</b> | <b>-0,25</b> | <b>-0,05</b> | <b>0,003</b>     |
| FM & Y                                                   | 22           | 1190 | 0,01        | 23,7%          | 0,155            | -0,04        | -0,12        | 0,03         | 0,247            | 12                    | 739  | <b>0,04</b> | <b>86,6%</b>   | <b>&lt;0,001</b> | -0,14        | -0,29        | 0,01         | 0,057            |
| 1 species                                                | 31           | 2054 | 0,00        | 0,0%           | 0,534            | -0,01        | -0,05        | 0,03         | 0,747            | 10                    | 553  | 0,00        | 19,6%          | 0,263            | 0,04         | -0,01        | 0,09         | 0,143            |
| 2 species                                                | 17           | 1228 | 0,01        | 37,7%          | 0,059            | -0,06        | -0,15        | 0,03         | 0,216            | 8                     | 572  | <b>0,03</b> | <b>84,4%</b>   | <b>&lt;0,001</b> | <b>-0,23</b> | <b>-0,39</b> | <b>-0,07</b> | <b>0,005</b>     |
| 3 or more species                                        | 35           | 1906 | <b>0,05</b> | <b>71,3%</b>   | <b>&lt;0,001</b> | <b>-0,27</b> | <b>-0,38</b> | <b>-0,16</b> | <b>&lt;0,001</b> | 10                    | 671  | <b>0,01</b> | <b>56,9%</b>   | <b>0,013</b>     | <b>-0,14</b> | <b>-0,22</b> | <b>-0,06</b> | <b>&lt;0,001</b> |



|                    | FG (mmol/l) |      |             |                |                  |              |              |              |                  | HbA <sub>1c</sub> (%) |      |             |                |                  |              |              |              |                  |
|--------------------|-------------|------|-------------|----------------|------------------|--------------|--------------|--------------|------------------|-----------------------|------|-------------|----------------|------------------|--------------|--------------|--------------|------------------|
|                    | RCT         | n    | $\tau^2$    | I <sup>2</sup> | P(het)           | E            | lb           | ub           | P                | RCT                   | n    | $\tau^2$    | I <sup>2</sup> | P(het)           | E            | lb           | ub           | P                |
| <i>B. bif.</i>     | 13          | 846  | <b>0,02</b> | <b>51,4%</b>   | <b>0,016</b>     | <b>-0,22</b> | <b>-0,35</b> | <b>-0,09</b> | <b>0,001</b>     | 4                     | 284  | 0,01        | 37,2%          | 0,189            | <b>-0,19</b> | <b>-0,36</b> | <b>-0,02</b> | <b>0,027</b>     |
| <i>B. brev.</i>    | 18          | 915  | <b>0,10</b> | <b>79,8%</b>   | <b>&lt;0,001</b> | <b>-0,34</b> | <b>-0,53</b> | <b>-0,15</b> | <b>0,001</b>     | 6                     | 362  | 0,02        | 43,1%          | 0,118            | <b>-0,26</b> | <b>-0,42</b> | <b>-0,10</b> | <b>0,001</b>     |
| <i>B. lac.</i>     | 24          | 1768 | <b>0,02</b> | <b>56,1%</b>   | <b>&lt;0,001</b> | -0,04        | -0,12        | 0,04         | 0,298            | 12                    | 917  | <b>0,02</b> | <b>78,2%</b>   | <b>&lt;0,001</b> | <b>-0,21</b> | <b>-0,33</b> | <b>-0,10</b> | <b>&lt;0,001</b> |
| <i>B. lon.</i>     | 18          | 981  | <b>0,07</b> | <b>65,8%</b>   | <b>&lt;0,001</b> | <b>-0,30</b> | <b>-0,47</b> | <b>-0,13</b> | <b>&lt;0,001</b> | 6                     | 367  | <b>0,03</b> | <b>59,5%</b>   | <b>0,030</b>     | <b>-0,22</b> | <b>-0,41</b> | <b>-0,03</b> | <b>0,025</b>     |
| <i>S. ther.</i>    | 23          | 1091 | <b>0,07</b> | <b>76,1%</b>   | <b>&lt;0,001</b> | <b>-0,28</b> | <b>-0,42</b> | <b>-0,14</b> | <b>&lt;0,001</b> | 7                     | 427  | <b>0,02</b> | <b>58,2%</b>   | <b>0,026</b>     | <b>-0,18</b> | <b>-0,32</b> | <b>-0,04</b> | <b>0,010</b>     |
| <i>Lc. lac.</i>    | 3           | 193  | 0,00        | 0,0%           | 0,437            | -0,17        | -0,61        | 0,27         | 0,453            | 2                     | 123  | 0,00        | 0,0%           | 0,691            | -0,06        | -0,28        | 0,16         | 0,611            |
| <i>L. hel.</i>     | 4           | 163  | <b>0,24</b> | <b>84,1%</b>   | <b>&lt;0,001</b> | -0,35        | -0,93        | 0,23         | 0,238            | 2                     | 113  | 0,00        | 0,0%           | 0,722            | <b>-0,18</b> | <b>-0,27</b> | <b>-0,09</b> | <b>&lt;0,001</b> |
| <i>L. acid.</i>    | 42          | 2435 | <b>0,05</b> | <b>70,1%</b>   | <b>&lt;0,001</b> | <b>-0,23</b> | <b>-0,33</b> | <b>-0,13</b> | <b>&lt;0,001</b> | 16                    | 1052 | 0,01        | 51,8%          | 0,008            | <b>-0,27</b> | <b>-0,35</b> | <b>-0,19</b> | <b>&lt;0,001</b> |
| <i>L. del.</i>     | 20          | 988  | <b>0,05</b> | <b>64,9%</b>   | <b>&lt;0,001</b> | <b>-0,31</b> | <b>-0,46</b> | <b>-0,16</b> | <b>&lt;0,001</b> | 6                     | 376  | <b>0,03</b> | <b>64,6%</b>   | <b>0,015</b>     | <b>-0,20</b> | <b>-0,39</b> | <b>-0,01</b> | <b>0,041</b>     |
| <i>L. gas.</i>     | 3           | 189  | 0,00        | 0,0%           | 0,798            | 0,06         | -0,14        | 0,26         | 0,581            | 3                     | 189  | 0,00        | 0,0%           | 0,586            | <b>0,10</b>  | <b>0,05</b>  | <b>0,15</b>  | <b>&lt;0,001</b> |
| <i>L. fer.</i>     | 3           | 180  | <b>0,27</b> | <b>68,7%</b>   | <b>0,041</b>     | -0,37        | -1,08        | 0,34         | 0,318            |                       |      |             |                |                  |              |              |              |                  |
| <i>L. rham.</i>    | 20          | 1271 | <b>0,04</b> | <b>64,0%</b>   | <b>&lt;0,001</b> | <b>-0,26</b> | <b>-0,39</b> | <b>-0,13</b> | <b>&lt;0,001</b> | 5                     | 417  | <b>0,06</b> | <b>79,4%</b>   | <b>0,001</b>     | -0,23        | -0,50        | 0,04         | 0,088            |
| <i>L. cas. gr.</i> | 37          | 2068 | <b>0,05</b> | <b>71,8%</b>   | <b>&lt;0,001</b> | <b>-0,25</b> | <b>-0,36</b> | <b>-0,14</b> | <b>&lt;0,001</b> | 12                    | 791  | <b>0,02</b> | <b>65,3%</b>   | <b>&lt;0,001</b> | <b>-0,20</b> | <b>-0,32</b> | <b>-0,08</b> | <b>0,001</b>     |
| <i>L. cur.</i>     | 2           | 187  | 0,00        | 0,0%           | 0,472            | -0,08        | -0,25        | 0,09         | 0,359            |                       |      |             |                |                  |              |              |              |                  |
| <i>L. sal.</i>     | 5           | 446  | 0,00        | 0,0%           | 0,468            | -0,01        | -0,11        | 0,09         | 0,797            |                       |      |             |                |                  |              |              |              |                  |
| <i>L. plan.</i>    | 13          | 815  | <b>0,02</b> | <b>54,5%</b>   | <b>0,009</b>     | -0,12        | -0,26        | 0,02         | 0,080            | 2                     | 152  | 0,00        | 0,0%           | 0,623            | <b>-0,17</b> | <b>-0,26</b> | <b>-0,09</b> | <b>&lt;0,001</b> |

Heading: RCT, number of trials; n, number of subjects;  $\tau^2$ , between-study variance; I<sup>2</sup>, heterogeneity measure; P(het), P value of heterogeneity test relating on I<sup>2</sup> measure; E, estimate; lb, lower boundary of 95% confidence interval; ub, upper boundary of confidence interval; P value of Wald test.

Outcome: FG, Fasting glucose; HbA<sub>1c</sub>, glycated haemoglobin.

Populations: NW, normal weight; OW, overweight; OB, obese; IFG, impaired fasting glucose; T2DM, type 2 diabetes mellitus; GDM, gestational diabetes; NAFLD, nonalcoholic fatty liver disease.

Food form: FM & Y, fermented milk or yogurt.

Species: *B. bif.*, *Bifidobacterium bifidum*; *B. brev.*, *Bifidobacterium breve*; *B. lac.*, *Bifidobacterium animalis* subsp. *lactis*; *B. lon.*, *Bifidobacterium longum*; *S. ther.*, *Streptococcus salivarius* subsp. *thermophilus*; *Lc. lac.*, *Lactococcus lactis*; *L. hel.*, *Lactobacillus helveticus*; *L. acid.*, *Lactobacillus acidophilus*; *L. del.*, *Lactobacillus delbrueckii*; *L. gas.*, *Lactobacillus gasseri*; *L. fer.*, *Lactobacillus fermentum*; *L. rham.*, *Lactobacillus rhamnosus*; *L. cas. gr.*, *Lactobacillus casei* or *paracasei*; *L. cur.*, *Lactobacillus curvatus*; *L. sal.*, *Lactobacillus salivarius*; *L. plan.*, *Lactobacillus plantarum*.

**Supplementary Table 8. Effect of probiotics on insulin and homeostatic model of insulin resistance. Subgroup analysis by study quality, study populations, daily dose (in CFU), food form, number of strains, species and subspecies.**

|                                                          | INS (mU/l) |      |             |                |                  |              |              |              |                  | HOMA-IR |      |             |                |                  |              |              |              |                  |
|----------------------------------------------------------|------------|------|-------------|----------------|------------------|--------------|--------------|--------------|------------------|---------|------|-------------|----------------|------------------|--------------|--------------|--------------|------------------|
|                                                          | RCT        | n    | $\tau^2$    | I <sup>2</sup> | P(het)           | E            | lb           | ub           | P                | RCT     | n    | $\tau^2$    | I <sup>2</sup> | P(het)           | E            | lb           | ub           | P                |
| All studies                                              | 63         | 3854 | <b>0,26</b> | <b>72,8%</b>   | <b>&lt;0,001</b> | <b>-0,80</b> | <b>-1,08</b> | <b>-0,52</b> | <b>&lt;0,001</b> | 52      | 3513 | <b>0,15</b> | <b>74,9%</b>   | <b>&lt;0,001</b> | <b>-0,27</b> | <b>-0,41</b> | <b>-0,12</b> | <b>&lt;0,001</b> |
| Excl. low quality studies                                | 52         | 3282 | <b>0,27</b> | <b>76,8%</b>   | <b>&lt;0,001</b> | <b>-0,85</b> | <b>-1,14</b> | <b>-0,55</b> | <b>&lt;0,001</b> | 44      | 3091 | <b>0,15</b> | <b>76,8%</b>   | <b>&lt;0,001</b> | <b>-0,31</b> | <b>-0,46</b> | <b>-0,15</b> | <b>&lt;0,001</b> |
| Excl. low/medium quality studies                         | 46         | 2915 | <b>0,79</b> | <b>73,9%</b>   | <b>&lt;0,001</b> | <b>-1,04</b> | <b>-1,44</b> | <b>-0,64</b> | <b>&lt;0,001</b> | 41      | 2925 | <b>0,10</b> | <b>70,3%</b>   | <b>&lt;0,001</b> | <b>-0,31</b> | <b>-0,45</b> | <b>-0,17</b> | <b>&lt;0,001</b> |
| Excl. studies with children                              | 62         | 3754 | <b>0,26</b> | <b>73,2%</b>   | <b>&lt;0,001</b> | <b>-0,81</b> | <b>-1,10</b> | <b>-0,53</b> | <b>&lt;0,001</b> | 50      | 3369 | <b>0,15</b> | <b>75,6%</b>   | <b>&lt;0,001</b> | <b>-0,28</b> | <b>-0,43</b> | <b>-0,13</b> | <b>&lt;0,001</b> |
| Excl. studies with pregnant women                        | 53         | 3000 | <b>0,14</b> | <b>61,8%</b>   | <b>&lt;0,001</b> | <b>-0,50</b> | <b>-0,76</b> | <b>-0,23</b> | <b>&lt;0,001</b> | 42      | 2548 | <b>0,15</b> | <b>73,2%</b>   | <b>&lt;0,001</b> | <b>-0,20</b> | <b>0,37</b>  | <b>-0,03</b> | <b>0,019</b>     |
| Excl. studies with gastric bypass                        | 62         | 3808 | <b>0,26</b> | <b>73,2%</b>   | <b>&lt;0,001</b> | <b>-0,81</b> | <b>-1,09</b> | <b>-0,52</b> | <b>&lt;0,001</b> | 50      | 3387 | <b>0,15</b> | <b>75,8%</b>   | <b>&lt;0,001</b> | <b>-0,27</b> | <b>-0,41</b> | <b>-0,12</b> | <b>&lt;0,001</b> |
| Excl. studies from Iran                                  | 37         | 2373 | <b>0,60</b> | <b>54,2%</b>   | <b>&lt;0,001</b> | -0,36        | -0,80        | 0,09         | 0,117            | 29      | 2162 | <b>0,17</b> | <b>74,2%</b>   | <b>&lt;0,001</b> | -0,12        | -0,32        | 0,08         | 0,231            |
| NW                                                       | 11         | 390  | 0,34        | 28,2%          | 0,176            | 0,11         | -0,57        | 0,79         | 0,744            | 6       | 325  | <b>0,23</b> | <b>78,2%</b>   | <b>&lt;0,001</b> | 0,27         | -0,19        | 0,73         | 0,247            |
| OW                                                       | 22         | 1310 | <b>0,56</b> | <b>77,9%</b>   | <b>&lt;0,001</b> | <b>-1,20</b> | <b>-1,78</b> | <b>-0,61</b> | <b>&lt;0,001</b> | 16      | 936  | <b>0,11</b> | <b>42,7%</b>   | <b>0,036</b>     | <b>-0,69</b> | <b>-0,99</b> | <b>-0,40</b> | <b>&lt;0,001</b> |
| OB                                                       | 20         | 1300 | 0,17        | 21,6%          | 0,187            | -0,39        | -0,84        | 0,07         | 0,094            | 20      | 1287 | <b>0,06</b> | <b>56,6%</b>   | <b>0,001</b>     | -0,09        | -0,27        | 0,08         | 0,280            |
| IFG                                                      | 17         | 828  | 0,00        | 0,0%           | 0,474            | <b>-0,77</b> | <b>-1,01</b> | <b>-0,52</b> | <b>&lt;0,001</b> | 13      | 683  | 0,01        | 16,4%          | 0,278            | 0,03         | -0,13        | 0,19         | 0,731            |
| T2DM                                                     | 13         | 795  | 1,29        | 37,8%          | 0,081            | <b>-1,66</b> | <b>-2,70</b> | <b>-0,61</b> | <b>0,002</b>     | 10      | 651  | 0,09        | 18,2%          | 0,275            | <b>-1,05</b> | <b>-1,48</b> | <b>-0,61</b> | <b>&lt;0,001</b> |
| GDM                                                      | 6          | 415  | <b>2,88</b> | <b>73,8%</b>   | <b>0,002</b>     | <b>-3,17</b> | <b>-4,88</b> | <b>-1,46</b> | <b>&lt;0,001</b> | 6       | 415  | <b>0,10</b> | <b>66,4%</b>   | <b>0,011</b>     | <b>-0,71</b> | <b>-1,05</b> | <b>-0,36</b> | <b>&lt;0,001</b> |
| NAFLD                                                    | 8          | 362  | <b>0,28</b> | <b>79,7%</b>   | <b>&lt;0,001</b> | -0,56        | -1,16        | 0,05         | 0,070            | 9       | 456  | <b>0,32</b> | <b>83,7%</b>   | <b>&lt;0,001</b> | -0,15        | -0,64        | 0,34         | 0,552            |
| <i>Dose &gt; 10<sup>8</sup> &amp; ≤ 10<sup>9</sup></i>   | 5          | 335  | 0,00        | 0,0%           | 0,630            | -1,21        | -2,48        | 0,05         | 0,060            | 4       | 242  | 0,00        | 0,0%           | 0,999            | <b>-0,29</b> | <b>-0,38</b> | <b>-0,21</b> | <b>&lt;0,001</b> |
| <i>Dose &gt; 10<sup>9</sup> &amp; ≤ 10<sup>10</sup></i>  | 28         | 1671 | <b>0,72</b> | <b>77,5%</b>   | <b>&lt;0,001</b> | <b>-0,92</b> | <b>-1,42</b> | <b>-0,41</b> | <b>&lt;0,001</b> | 24      | 1524 | <b>0,30</b> | <b>80,8%</b>   | <b>0,001</b>     | <b>-0,28</b> | <b>-0,55</b> | <b>-0,01</b> | <b>0,041</b>     |
| <i>Dose &gt; 10<sup>10</sup> &amp; ≤ 10<sup>11</sup></i> | 17         | 1265 | <b>1,01</b> | <b>54,7%</b>   | <b>0,004</b>     | -0,92        | -1,72        | -0,11        | 0,026            | 15      | 1279 | <b>0,13</b> | <b>60,1%</b>   | <b>0,005</b>     | -0,19        | -0,46        | 0,09         | 0,182            |
| <i>Dose &gt; 10<sup>11</sup> &amp; ≤ 10<sup>12</sup></i> | 9          | 402  | <b>1,88</b> | <b>70,4%</b>   | <b>0,001</b>     | -0,98        | -2,19        | 0,22         | 0,109            | 5       | 287  | <b>0,17</b> | <b>72,7%</b>   | <b>0,009</b>     | <b>-0,51</b> | <b>-0,99</b> | <b>-0,03</b> | <b>0,036</b>     |
| Pill                                                     | 39         | 2509 | <b>0,97</b> | <b>81,2%</b>   | <b>&lt;0,001</b> | <b>-1,49</b> | <b>-2,00</b> | <b>-0,99</b> | <b>&lt;0,001</b> | 35      | 2380 | <b>0,17</b> | <b>78,8%</b>   | <b>&lt;0,001</b> | <b>-0,37</b> | <b>-0,56</b> | <b>-0,18</b> | <b>&lt;0,001</b> |
| FM & Y                                                   | 17         | 949  | 0,00        | 0,0%           | 0,483            | -0,08        | -0,20        | 0,05         | 0,236            | 12      | 750  | <b>0,10</b> | <b>55,2%</b>   | <b>0,011</b>     | -0,04        | -0,30        | 0,22         | 0,751            |
| 1 species                                                | 25         | 1626 | 0,08        | 4,6%           | 0,397            | <b>-0,62</b> | <b>-1,14</b> | <b>-0,10</b> | <b>0,019</b>     | 17      | 1007 | 0,01        | 14,2%          | 0,287            | 0,02         | -0,13        | 0,18         | 0,768            |
| 2 species                                                | 13         | 962  | <b>0,09</b> | <b>77,2%</b>   | <b>&lt;0,001</b> | -0,30        | -0,63        | 0,03         | 0,078            | 12      | 978  | <b>0,15</b> | <b>75,0%</b>   | <b>&lt;0,001</b> | -0,18        | -0,45        | 0,10         | 0,212            |
| 3 or more species                                        | 25         | 1266 | <b>1,39</b> | <b>68,1%</b>   | <b>&lt;0,001</b> | <b>-1,72</b> | <b>-2,40</b> | <b>-1,04</b> | <b>&lt;0,001</b> | 23      | 1328 | <b>0,21</b> | <b>80,1%</b>   | <b>&lt;0,001</b> | <b>-0,62</b> | <b>-0,89</b> | <b>-0,35</b> | <b>&lt;0,001</b> |

|                    | INS (mU/l) |      |             |                |                  |              |              |              |                  | HOMA-IR |      |             |                |                  |              |              |              |                  |
|--------------------|------------|------|-------------|----------------|------------------|--------------|--------------|--------------|------------------|---------|------|-------------|----------------|------------------|--------------|--------------|--------------|------------------|
|                    | RCT        | n    | $\tau^2$    | I <sup>2</sup> | P(het)           | E            | lb           | ub           | P                | RCT     | n    | $\tau^2$    | I <sup>2</sup> | P(het)           | E            | lb           | ub           | P                |
| <i>B. bif.</i>     | 10         | 646  | 0,32        | 17,2%          | 0,285            | <b>-3,27</b> | <b>-4,12</b> | <b>-2,42</b> | <b>&lt;0,001</b> | 11      | 726  | 0,82        | 39,7%          | 0,084            | <b>-0,91</b> | <b>-1,21</b> | <b>-0,61</b> | <b>&lt;0,001</b> |
| <i>B. brev.</i>    | 12         | 530  | <b>1,16</b> | <b>61,9%</b>   | <b>0,002</b>     | <b>-1,32</b> | <b>-2,27</b> | <b>-0,36</b> | <b>0,007</b>     | 11      | 560  | <b>0,31</b> | <b>86,9%</b>   | <b>&lt;0,001</b> | -0,38        | -0,82        | 0,06         | 0,094            |
| <i>B. lac.</i>     | 20         | 1461 | <b>0,92</b> | <b>64,5%</b>   | <b>&lt;0,001</b> | <b>-0,69</b> | <b>-1,31</b> | <b>-0,07</b> | <b>0,029</b>     | 20      | 1596 | <b>0,18</b> | <b>76,4%</b>   | <b>&lt;0,001</b> | <b>-0,28</b> | <b>-0,51</b> | <b>-0,05</b> | <b>0,018</b>     |
| <i>B. lon.</i>     | 10         | 501  | 0,47        | 40,3%          | 0,089            | <b>-0,98</b> | <b>-1,76</b> | <b>-0,20</b> | <b>0,014</b>     | 10      | 551  | <b>0,36</b> | <b>84,8%</b>   | <b>&lt;0,001</b> | -0,36        | -0,84        | 0,13         | 0,153            |
| <i>S. ther.</i>    | 15         | 611  | <b>0,69</b> | <b>60,1%</b>   | <b>0,001</b>     | <b>-0,84</b> | <b>-1,48</b> | <b>-0,19</b> | <b>0,011</b>     | 13      | 673  | <b>0,20</b> | <b>84,6%</b>   | <b>&lt;0,001</b> | -0,33        | -0,66        | <0,001       | 0,050            |
| <i>Lc. lac.</i>    |            |      |             |                |                  |              |              |              |                  | 2       | 158  | 1,39        | 63,2%          | 0,099            | -1,69        | -3,74        | 0,37         | 0,108            |
| <i>L. hel.</i>     | 4          | 163  | <b>6,84</b> | <b>83,3%</b>   | <b>&lt;0,001</b> | -1,53        | -4,41        | 1,34         | 0,296            | 4       | 187  | 0,04        | 25,5%          | 0,258            | <b>-0,80</b> | <b>-1,15</b> | <b>-0,45</b> | <b>&lt;0,001</b> |
| <i>L. acid.</i>    | 32         | 1830 | <b>0,90</b> | <b>79,6%</b>   | <b>&lt;0,001</b> | <b>-1,39</b> | <b>-1,90</b> | <b>-0,87</b> | <b>&lt;0,001</b> | 31      | 1844 | <b>0,17</b> | <b>79,4%</b>   | <b>&lt;0,001</b> | <b>-0,47</b> | <b>-0,66</b> | <b>-0,27</b> | <b>&lt;0,001</b> |
| <i>L. del.</i>     | 14         | 624  | 0,33        | 38,2%          | 0,072            | <b>-0,63</b> | <b>-1,21</b> | <b>-0,06</b> | <b>0,030</b>     | 11      | 582  | <b>0,25</b> | <b>83,5%</b>   | <b>&lt;0,001</b> | -0,31        | -0,71        | 0,08         | 0,119            |
| <i>L. gas.</i>     | 3          | 189  | 0,00        | 0,0%           | 0,794            | -1,35        | -3,97        | 1,28         | 0,315            |         |      |             |                |                  |              |              |              |                  |
| <i>L. fer.</i>     | 2          | 120  | 0,00        | 0,0%           | 0,864            | <b>-4,37</b> | <b>-6,13</b> | <b>-2,61</b> | <b>&lt;0,001</b> | 3       | 180  | 0,10        | 37,7%          | 0,201            | <b>-0,68</b> | <b>-1,26</b> | <b>-0,09</b> | <b>0,023</b>     |
| <i>L. rham.</i>    | 12         | 640  | 0,44        | 43,2%          | 0,055            | -0,60        | -1,28        | 0,09         | 0,090            | 10      | 756  | <b>0,36</b> | <b>82,9%</b>   | <b>&lt;0,001</b> | -0,26        | -0,76        | 0,23         | 0,293            |
| <i>L. cas. gr.</i> | 26         | 1360 | <b>1,55</b> | <b>64,2%</b>   | <b>&lt;0,001</b> | <b>-1,97</b> | <b>-2,69</b> | <b>-1,24</b> | <b>&lt;0,001</b> | 24      | 1377 | <b>0,24</b> | <b>81,8%</b>   | <b>&lt;0,001</b> | <b>-0,54</b> | <b>-0,81</b> | <b>-0,27</b> | <b>&lt;0,001</b> |
| <i>L. cur.</i>     | 2          | 187  | 0,41        | 60,4%          | 0,112            | 0,35         | -0,70        | 1,41         | 0,511            |         |      |             |                |                  |              |              |              |                  |
| <i>L. sal.</i>     | 5          | 446  | 0,55        | 27,7%          | 0,237            | 0,01         | -1,22        | 1,23         | 0,992            | 5       | 446  | <b>0,42</b> | <b>67,0%</b>   | <b>0,016</b>     | -0,20        | -0,93        | 0,54         | 0,600            |
| <i>L. plan.</i>    | 7          | 369  | <b>2,33</b> | <b>83,6%</b>   | <b>&lt;0,001</b> | -1,28        | -2,70        | 0,14         | 0,078            | 6       | 342  | <b>0,38</b> | <b>83,2%</b>   | <b>&lt;0,001</b> | -0,47        | -1,09        | 0,14         | 0,131            |

Heading: RCT, number of trials; n, number of subjects;  $\tau^2$ , between-study variance; I<sup>2</sup>, heterogeneity measure; P(het), P value of heterogeneity test relating on I<sup>2</sup> measure; E, estimate; lb, lower boundary of 95% confidence interval; ub, upper boundary of confidence interval; P value of Wald test.

Outcome: INS, insulin; HOMA-IR; homeostatic model of insulin resistance.

Population: NW, normal weight; OW, overweight; OB, obese; IFG, impaired fasting glucose; T2DM, type 2 diabetes mellitus; GDM, gestational diabetes; NAFLD, nonalcoholic fatty liver disease.

Food form: FM & Y, fermented milk or yogurt.

Species: *B. bif.*, *Bifidobacterium bifidum*; *B. brev.*, *Bifidobacterium breve*; *B. lac.*, *Bifidobacterium animalis* subsp. *lactis*; *B. lon.*, *Bifidobacterium longum*; *S. ther.*, *Streptococcus salivarius* subsp. *thermophilus*; *Lc. lac.*, *Lactococcus lactis*; *L. hel.*, *Lactobacillus helveticus*; *L. acid.*, *Lactobacillus acidophilus*; *L. del.*, *Lactobacillus delbrueckii*; *L. gas.*, *Lactobacillus gasseri*; *L. reut.*, *Lactobacillus reuteri*; *L. fer.*, *Lactobacillus fermentum*; *L. rham.*, *Lactobacillus rhamnosus*; *L. cas. gr.*, *Lactobacillus casei* or *paracasei*; *L. cur.*, *Lactobacillus curvatus*; *L. sal.*, *Lactobacillus salivarius*; *L. plan.*, *Lactobacillus plantarum*.

**Supplementary Table 9. Effect of probiotics on C-reactive protein and triglycerides. Subgroup analysis by study quality, study populations, daily dose (in CFU), food form, species and subspecies.**

|                                                          | CRP (mg/l) |      |             |                |                  |              |              |              |                  | TG (mg/dl) |      |               |                |                  |               |               |              |                  |
|----------------------------------------------------------|------------|------|-------------|----------------|------------------|--------------|--------------|--------------|------------------|------------|------|---------------|----------------|------------------|---------------|---------------|--------------|------------------|
|                                                          | RCT        | n    | $\tau^2$    | I <sup>2</sup> | P(het)           | E            | lb           | ub           | P                | RCT        | n    | $\tau^2$      | I <sup>2</sup> | P(het)           | E             | lb            | ub           | P                |
| All studies                                              | 41         | 2376 | <b>0,38</b> | <b>67,1%</b>   | <b>&lt;0,001</b> | <b>-0,48</b> | <b>-0,76</b> | <b>-0,21</b> | <b>0,001</b>     | 74         | 4461 | <b>77,46</b>  | <b>35,9%</b>   | <b>0,002</b>     | <b>-5,40</b>  | <b>-9,17</b>  | <b>-1,63</b> | <b>0,005</b>     |
| Excl. low quality studies                                | 34         | 2044 | <b>0,41</b> | <b>69,0%</b>   | <b>&lt;0,001</b> | <b>-0,55</b> | <b>-0,85</b> | <b>-0,26</b> | <b>&lt;0,001</b> | 60         | 3749 | <b>107,18</b> | <b>43,1%</b>   | <b>&lt;0,001</b> | <b>-6,52</b>  | <b>-10,91</b> | <b>-2,13</b> | <b>0,004</b>     |
| Excl. low/medium quality studies                         | 25         | 1466 | <b>0,65</b> | <b>72,3%</b>   | <b>&lt;0,001</b> | <b>-0,70</b> | <b>-1,12</b> | <b>-0,28</b> | <b>0,001</b>     | 49         | 2965 | <b>109,64</b> | <b>43,5%</b>   | <b>0,001</b>     | <b>-6,65</b>  | <b>-11,60</b> | <b>-1,71</b> | <b>0,008</b>     |
| Excl. studies with children                              | 40         | 2276 | <b>0,38</b> | <b>67,7%</b>   | <b>&lt;0,001</b> | <b>-0,47</b> | <b>-0,75</b> | <b>-0,19</b> | <b>0,001</b>     | 70         | 4197 | <b>88,33</b>  | <b>38,8%</b>   | <b>0,001</b>     | <b>-5,79</b>  | <b>-9,81</b>  | <b>-1,77</b> | <b>0,005</b>     |
| Excl. studies with pregnant women                        | 36         | 1990 | <b>0,16</b> | <b>47,0%</b>   | <b>0,001</b>     | <b>-0,29</b> | <b>-0,52</b> | <b>-0,06</b> | <b>0,012</b>     | 69         | 4033 | 36,67         | 21,0%          | 0,069            | <b>-3,75</b>  | <b>-7,18</b>  | <b>-0,32</b> | <b>0,032</b>     |
| Excl. studies with gastric bypass                        | 39         | 2250 | <b>0,38</b> | <b>68,0%</b>   | <b>&lt;0,001</b> | <b>-0,51</b> | <b>-0,79</b> | <b>-0,23</b> | <b>&lt;0,001</b> | 72         | 4335 | <b>81,23</b>  | <b>37,3%</b>   | <b>0,001</b>     | <b>-5,27</b>  | <b>-9,12</b>  | <b>-1,42</b> | <b>0,007</b>     |
| Excl. studies from Iran                                  | 26         | 1568 | 0,10        | 40,6%          | 0,018            | -0,10        | -0,33        | 0,13         | 0,385            | 47         | 2878 | 1,88          | 1,2%           | 0,449            | -0,26         | -3,82         | 3,30         | 0,887            |
| NW                                                       | 11         | 442  | 0,00        | 0,0%           | 0,607            | -0,03        | -0,22        | 0,16         | 0,730            | 17         | 778  | 69,63         | 33,7%          | 0,087            | -5,03         | -12,29        | 2,23         | 0,174            |
| OW                                                       | 14         | 791  | 0,00        | 0,0%           | 0,515            | <b>-0,42</b> | <b>-0,64</b> | <b>-0,20</b> | <b>&lt;0,001</b> | 28         | 1795 | 49,96         | 30,5%          | 0,065            | -4,40         | -9,75         | 0,96         | 0,108            |
| OB                                                       | 12         | 778  | <b>1,19</b> | <b>72,2%</b>   | <b>&lt;0,001</b> | 0,08         | -0,73        | 0,88         | 0,852            | 24         | 1460 | 0,00          | 0,0%           | 0,508            | -0,92         | -6,60         | 4,77         | 0,752            |
| IFG                                                      | 6          | 249  | <b>2,41</b> | <b>84,8%</b>   | <b>&lt;0,001</b> | 0,36         | -1,04        | 1,76         | 0,616            | 18         | 863  | 86,62         | 25,9%          | 0,152            | -1,57         | -10,51        | 7,37         | 0,731            |
| T2DM                                                     | 9          | 381  | 0,00        | 0,0%           | 0,885            | <b>-0,52</b> | <b>-0,89</b> | <b>-0,15</b> | <b>0,006</b>     | 14         | 865  | 0,00          | 0,0%           | 0,609            | <b>-9,05</b>  | <b>-15,64</b> | <b>-2,46</b> | <b>0,007</b>     |
| GDM                                                      | 3          | 188  | 0,00        | 0,0%           | 0,403            | <b>-1,88</b> | <b>-2,35</b> | <b>-1,42</b> | <b>&lt;0,001</b> | 3          | 230  | 241,21        | 58,6%          | 0,089            | <b>-27,40</b> | <b>-50,39</b> | <b>-4,42</b> | <b>0,019</b>     |
| NAFLD                                                    | 3          | 212  | 0,74        | 46,8%          | 0,152            | -0,41        | -1,86        | 1,03         | 0,574            | 11         | 614  | 64,45         | 33,2%          | 0,133            | <b>-12,89</b> | <b>-21,82</b> | <b>-3,97</b> | <b>0,005</b>     |
| <i>Dose &gt; 10<sup>8</sup> &amp; ≤ 10<sup>9</sup></i>   | 2          | 145  | 0,00        | 0,0%           | 0,817            | -1,25        | -2,53        | 0,04         | 0,057            | 2          | 76   | 178,31        | 0,0%           | 0,859            | -6,46         | -46,15        | 33,23        | 0,750            |
| <i>Dose &gt; 10<sup>9</sup> &amp; ≤ 10<sup>10</sup></i>  | 16         | 901  | <b>0,43</b> | <b>63,6%</b>   | <b>&lt;0,001</b> | <b>-0,84</b> | <b>-1,32</b> | <b>-0,35</b> | <b>0,001</b>     | 6          | 414  | 108,07        | 52,7%          | 0,061            | -4,84         | -21,20        | 11,52        | 0,562            |
| <i>Dose &gt; 10<sup>10</sup> &amp; ≤ 10<sup>11</sup></i> | 15         | 1081 | <b>0,34</b> | <b>63,6%</b>   | <b>&lt;0,001</b> | -0,09        | -0,50        | 0,32         | 0,665            | 29         | 1767 | <b>62,27</b>  | <b>48,6%</b>   | <b>0,002</b>     | <b>-10,47</b> | <b>-16,52</b> | <b>-4,43</b> | <b>0,001</b>     |
| <i>Dose &gt; 10<sup>11</sup> &amp; ≤ 10<sup>12</sup></i> | 5          | 134  | <b>0,98</b> | <b>88,3%</b>   | <b>&lt;0,001</b> | -0,67        | -1,64        | 0,30         | 0,176            | 23         | 1602 | 0,00          | 28,3%          | 0,102            | -0,91         | -7,32         | 5,51         | 0,782            |
| Pill, P                                                  | 24         | 1445 | <b>0,73</b> | <b>68,8%</b>   | <b>&lt;0,001</b> | <b>-0,71</b> | <b>-1,17</b> | <b>-0,25</b> | <b>0,003</b>     | 43         | 2679 | <b>122,77</b> | <b>48,0%</b>   | <b>&lt;0,001</b> | <b>-9,61</b>  | <b>-15,01</b> | <b>-4,22</b> | <b>&lt;0,001</b> |
| FM, Y                                                    | 9          | 324  | 0,00        | 0,0%           | 0,598            | -0,07        | -0,26        | 0,12         | 0,461            | 23         | 1216 | 0,00          | 0,0%           | 0,942            | -0,40         | -5,48         | 4,67         | 0,876            |
| 1 species                                                | 20         | 1313 | <b>0,21</b> | <b>48,6%</b>   | <b>0,008</b>     | -0,10        | -0,44        | 0,25         | 0,587            | 28         | 1934 | 0,00          | 0,0%           | 0,938            | 3,53          | -1,14         | 8,19         | 0,139            |
| 2 species                                                | 4          | 247  | 0,00        | 0,0%           | 0,700            | -0,21        | -0,48        | 0,06         | 0,725            | 14         | 777  | 38,83         | 11,6%          | 0,326            | -9,64         | -19,33        | 0,04         | 0,051            |
| 3 or more species                                        | 17         | 816  | <b>0,77</b> | <b>73,8%</b>   | <b>&lt;0,001</b> | -1,07        | -1,62        | -0,51        | 0,126            | 32         | 1750 | <b>116,57</b> | <b>52,5%</b>   | <b>&lt;0,001</b> | <b>-10,94</b> | <b>-16,80</b> | <b>-5,08</b> | <b>&lt;0,001</b> |

|                    | CRP (mg/l) |     |             |                |                  |              |              |              |                  |     | TG (mg/dl) |               |                |              |               |               |              |                  |  |  |
|--------------------|------------|-----|-------------|----------------|------------------|--------------|--------------|--------------|------------------|-----|------------|---------------|----------------|--------------|---------------|---------------|--------------|------------------|--|--|
|                    | RCT        | n   | $\tau^2$    | I <sup>2</sup> | P(het)           | E            | lb           | ub           | P                | RCT | n          | $\tau^2$      | I <sup>2</sup> | P(het)       | E             | lb            | ub           | P                |  |  |
| <i>B. brev.</i>    | 9          | 478 | <b>0,49</b> | <b>62,30%</b>  | <b>0,007</b>     | <b>-0,85</b> | <b>-1,49</b> | <b>-0,21</b> | <b>0,009</b>     | 14  | 724        | 99,10         | 31,00%         | 0,128        | <b>-13,32</b> | <b>-23,04</b> | <b>-3,60</b> | <b>0,007</b>     |  |  |
| <i>B. lac.</i>     | 9          | 528 | 0,24        | 47,8%          | 0,053            | <b>-0,91</b> | <b>-1,41</b> | <b>-0,41</b> | <b>&lt;0,001</b> | 20  | 1319       | 0,00          | 0,0%           | 0,496        | -0,40         | -5,14         | 4,33         | 0,867            |  |  |
| <i>B. lon.</i>     | 6          | 332 | 0,28        | 40,8%          | 0,133            | -0,50        | -1,20        | 0,20         | 0,161            | 16  | 882        | 47,26         | 25,1%          | 0,171        | <b>-12,28</b> | <b>-19,61</b> | <b>-4,96</b> | <b>0,001</b>     |  |  |
| <i>S. ther.</i>    | 12         | 522 | <b>0,48</b> | <b>75,5%</b>   | <b>&lt;0,001</b> | <b>-0,64</b> | <b>-1,17</b> | <b>-0,10</b> | <b>0,020</b>     | 22  | 1006       | 67,16         | 32,3%          | 0,073        | <b>-7,55</b>  | <b>-14,35</b> | <b>-0,07</b> | <b>0,030</b>     |  |  |
| <i>Lc. lac.</i>    |            |     |             |                |                  |              |              |              |                  | 4   | 236        | 440,36        | 47,0%          | 0,129        | -6,04         | -36,33        | 24,25        | 0,696            |  |  |
| <i>L. hel.</i>     | 4          | 163 | <b>0,45</b> | <b>68,0%</b>   | <b>0,025</b>     | <b>-1,04</b> | <b>-1,86</b> | <b>-0,22</b> | <b>0,013</b>     | 3   | 115        | 0,00          | 0,0%           | 0,471        | 1,19          | -19,47        | 21,85        | 0,910            |  |  |
| <i>L. acid.</i>    | 17         | 889 | 0,21        | 34,6%          | 0,080            | <b>-1,24</b> | <b>-1,63</b> | <b>-0,84</b> | <b>&lt;0,001</b> | 38  | 2220       | <b>92,43</b>  | <b>40,2%</b>   | <b>0,006</b> | <b>-10,71</b> | <b>-16,06</b> | <b>-5,36</b> | <b>&lt;0,001</b> |  |  |
| <i>L. del.</i>     | 9          | 354 | 0,04        | 20,9%          | 0,257            | -0,26        | -0,58        | 0,07         | 0,121            | 18  | 893        | <b>83,28</b>  | <b>42,6%</b>   | <b>0,029</b> | <b>-10,07</b> | <b>-17,35</b> | <b>-2,79</b> | <b>0,007</b>     |  |  |
| <i>L. gas.</i>     |            |     |             |                |                  |              |              |              |                  | 3   | 189        | 0,00          | 0,0%           | 0,733        | 4,53          | -13,98        | 23,03        | 0,632            |  |  |
| <i>L. reut.</i>    | 2          | 50  | 0,00        | 0,0%           | 0,922            | 0,30         | -0,75        | 1,34         | 0,580            |     |            |               |                |              |               |               |              |                  |  |  |
| <i>L. fer.</i>     | 2          | 120 | 0,33        | 17,7%          | 0,270            | <b>-1,64</b> | <b>-3,07</b> | <b>-0,21</b> | <b>0,025</b>     | 3   | 180        | 0,00          | 0,0%           | 0,405        | <b>-8,84</b>  | <b>-16,31</b> | <b>-1,37</b> | <b>0,020</b>     |  |  |
| <i>L. rham.</i>    | 8          | 417 | 0,20        | 32,6%          | 0,168            | -0,30        | -0,88        | 0,29         | 0,317            | 18  | 922        | 88,47         | 38,4%          | 0,050        | <b>-9,36</b>  | <b>-17,13</b> | <b>-1,59</b> | <b>0,018</b>     |  |  |
| <i>L. cas. gr.</i> | 16         | 842 | <b>1,51</b> | <b>79,3%</b>   | <b>&lt;0,001</b> | <b>-0,78</b> | <b>-1,51</b> | <b>-0,05</b> | <b>0,036</b>     | 32  | 1804       | <b>109,20</b> | <b>46,5%</b>   | <b>0,002</b> | <b>-12,66</b> | <b>-18,74</b> | <b>-6,58</b> | <b>&lt;0,001</b> |  |  |
| <i>L. cur.</i>     | 2          | 187 | 0,00        | 0,0%           | 0,556            | -0,10        | -0,60        | 0,40         | 0,684            | 2   | 187        | <b>703,04</b> | <b>75,3%</b>   | <b>0,044</b> | -36,53        | -78,57        | 5,50         | 0,088            |  |  |
| <i>L. sal.</i>     | 3          | 268 | 0,00        | 0,0%           | 0,584            | -0,72        | -1,89        | 0,44         | 0,224            | 5   | 446        | 80,26         | 32,7%          | 0,203        | -4,10         | -18,05        | 9,84         | 0,564            |  |  |
| <i>L. plan.</i>    | 10         | 703 | <b>0,51</b> | <b>80,0%</b>   | <b>&lt;0,001</b> | -0,44        | -1,02        | 0,13         | 0,128            | 13  | 600        | 124,22        | 28,8%          | 0,155        | -6,50         | -18,56        | 5,55         | 0,290            |  |  |

Heading: RCT, number of trials; n, number of subjects;  $\tau^2$ , between-study variance; I<sup>2</sup>, heterogeneity measure; P(het), P value of heterogeneity test relating on I<sup>2</sup> measure; E, estimate; lb, lower boundary of 95% confidence interval; ub, upper boundary of confidence interval; P value of Wald test.

Outcome: CRP, C-reactive protein; TG, triglycerides.

Populations: NW, normal weight; OW, overweight; OB, obese; IFG, impaired fasting glucose; T2DM, type 2 diabetes mellitus; GDM, gestational diabetes; NAFLD, nonalcoholic fatty liver disease.

Food form: FM & Y, fermented milk or yogurt.

Species: *B. brev.*, *Bifidobacterium breve*; *B. lac.*, *Bifidobacterium animalis* subsp. *lactis*; *B. lon.*, *Bifidobacterium longum*; *S. ther.*, *Streptococcus salivarius* subsp. *thermophilus*; *Lc. lac.*, *Lactococcus lactis*; *L. hel.*, *Lactobacillus helveticus*; *L. acid.*, *Lactobacillus acidophilus*; *L. del.*, *Lactobacillus delbrueckii*; *L. gas.*, *Lactobacillus gasseri*; *L. reut.*, *Lactobacillus reuteri*; *L. fer.*, *Lactobacillus fermentum*; *L. rham.*, *Lactobacillus rhamnosus*; *L. cas. gr.*, *Lactobacillus casei* or *paracasei*; *L. cur.*, *Lactobacillus curvatus*; *L. sal.*, *Lactobacillus salivarius*; *L. plan.*, *Lactobacillus plantarum*.

SI conversion factors: To convert CRP to nmol/L, multiply values by 9.524. To convert triglycerides to mmol/L, divide values by 88.57.

**Supplementary Table 10. Effect of probiotics on alanine-, aspartate- and gamma-glutamyl- transferases. Subgroup analysis by study quality, study populations, daily dose (in CFU), food form, number of strains, species and subspecies.**

|                                                          | ALAT (U/l) |      |              |                |                  |               |               |               |                  | ASAT (U/l) |      |               |                |                  |               |               |               |                  |
|----------------------------------------------------------|------------|------|--------------|----------------|------------------|---------------|---------------|---------------|------------------|------------|------|---------------|----------------|------------------|---------------|---------------|---------------|------------------|
|                                                          | RCT        | n    | $\tau^2$     | I <sup>2</sup> | P(het)           | E             | lb            | ub            | P                | RCT        | n    | $\tau^2$      | I <sup>2</sup> | P(het)           | E             | lb            | ub            | P                |
| All studies                                              | 26         | 1466 | <b>52,47</b> | <b>92,9%</b>   | <b>&lt;0,001</b> | <b>-4,40</b>  | <b>-7,58</b>  | <b>-1,22</b>  | <b>0,007</b>     | 23         | 1340 | <b>63,43</b>  | <b>96,8%</b>   | <b>&lt;0,001</b> | <b>-3,67</b>  | <b>-7,25</b>  | <b>-0,09</b>  | <b>0,044</b>     |
| Excl. low quality studies                                | 23         | 1331 | <b>41,41</b> | <b>87,9%</b>   | <b>&lt;0,001</b> | <b>-4,25</b>  | <b>-7,36</b>  | <b>-1,13</b>  | <b>0,008</b>     | 20         | 1205 | <b>49,17</b>  | <b>92,7%</b>   | <b>&lt;0,001</b> | <b>-3,49</b>  | <b>-6,96</b>  | <b>-0,03</b>  | <b>0,048</b>     |
| Excl. low/medium quality studies                         | 18         | 1091 | <b>60,37</b> | <b>88,2%</b>   | <b>&lt;0,001</b> | -3,88         | -7,93         | 0,17          | 0,061            | 16         | 1027 | <b>62,43</b>  | <b>92,0%</b>   | <b>&lt;0,001</b> | -2,87         | -7,06         | 1,33          | 0,180            |
| Excl. studies with children                              | 23         | 1338 | <b>55,09</b> | <b>93,7%</b>   | <b>&lt;0,001</b> | <b>-3,75</b>  | <b>-7,17</b>  | <b>-0,34</b>  | <b>0,031</b>     | 22         | 1276 | <b>63,91</b>  | <b>97,0%</b>   | <b>&lt;0,001</b> | -2,64         | -7,32         | 0,03          | 0,052            |
| Excl. studies with pregnant women                        | 26         | 1466 | <b>0,00</b>  | <b>92,9%</b>   | <b>&lt;0,001</b> | <b>-4,40</b>  | <b>-7,58</b>  | <b>-1,22</b>  | <b>0,007</b>     | 23         | 1340 | <b>63,43</b>  | <b>96,8%</b>   | <b>&lt;0,001</b> | <b>-3,67</b>  | <b>-7,25</b>  | <b>-0,09</b>  | <b>0,044</b>     |
| Excl. studies with gastric bypass                        | 25         | 1386 | <b>52,47</b> | <b>93,1%</b>   | <b>&lt;0,001</b> | <b>-4,57</b>  | <b>-7,81</b>  | <b>-1,33</b>  | <b>0,006</b>     | 22         | 1260 | <b>63,72</b>  | <b>96,9%</b>   | <b>&lt;0,001</b> | <b>-3,74</b>  | <b>-7,42</b>  | <b>-0,07</b>  | <b>0,046</b>     |
| Excl. studies from Iran                                  | 17         | 973  | <b>91,86</b> | <b>93,7%</b>   | <b>&lt;0,001</b> | -1,69         | -6,69         | 3,32          | 0,508            | 14         | 847  | <b>112,43</b> | <b>97,8%</b>   | <b>&lt;0,001</b> | -0,06         | -5,92         | 5,81          | 0,984            |
| NW                                                       | 7          | 244  | <b>33,85</b> | <b>84,1%</b>   | <b>&lt;0,001</b> | -0,85         | -6,11         | 4,41          | 0,752            | 6          | 224  | <b>38,57</b>  | <b>94,4%</b>   | <b>&lt;0,001</b> | -0,41         | -5,77         | 4,96          | 0,882            |
| OW                                                       | 10         | 640  | <b>71,94</b> | <b>93,6%</b>   | <b>&lt;0,001</b> | <b>-7,49</b>  | <b>-13,29</b> | <b>-1,69</b>  | <b>0,001</b>     | 8          | 534  | <b>106,16</b> | <b>95,9%</b>   | <b>&lt;0,001</b> | -8,11         | -16,28        | 0,07          | 0,052            |
| OB                                                       | 9          | 582  | <b>91,51</b> | <b>91,5%</b>   | <b>&lt;0,001</b> | -3,37         | -10,17        | 3,44          | 0,332            | 9          | 582  | <b>101,58</b> | <b>95,1%</b>   | <b>&lt;0,001</b> | -3,18         | -10,02        | 3,65          | 0,361            |
| IFG                                                      | 4          | 168  | <b>44,68</b> | <b>82,5%</b>   | <b>0,001</b>     | -2,76         | -10,46        | 4,94          | 0,483            | 3          | 106  | <b>94,71</b>  | <b>88,7%</b>   | <b>&lt;0,001</b> | -1,83         | -13,55        | 9,90          | 0,760            |
| T2DM                                                     | 4          | 228  | 0,00         | 0,0%           | 0,728            | -1,94         | -5,11         | 1,23          | 0,230            | 4          | 228  | 0,00          | 0,0%           | 0,763            | 1,12          | -3,12         | 5,35          | 0,605            |
| NAFLD                                                    | 12         | 658  | <b>37,63</b> | <b>93,5%</b>   | <b>&lt;0,001</b> | <b>-10,17</b> | <b>-14,29</b> | <b>-6,04</b>  | <b>&lt;0,001</b> | 10         | 594  | <b>33,95</b>  | <b>96,1%</b>   | <b>&lt;0,001</b> | <b>-9,94</b>  | <b>-14,07</b> | <b>-5,80</b>  | <b>&lt;0,001</b> |
| <i>Dose &gt; 10<sup>8</sup> &amp; ≤ 10<sup>9</sup></i>   | 2          | 127  | 1,03         | 51,4%          | 0,152            | <b>-16,53</b> | <b>-18,41</b> | <b>-14,64</b> | <b>&lt;0,001</b> | 2          | 127  | <b>25,20</b>  | <b>94,6%</b>   | <b>&lt;0,001</b> | <b>-19,57</b> | <b>-26,72</b> | <b>-12,43</b> | <b>&lt;0,001</b> |
| <i>Dose &gt; 10<sup>9</sup> &amp; ≤ 10<sup>10</sup></i>  | 6          | 307  | <b>33,39</b> | <b>84,6%</b>   | <b>&lt;0,001</b> | -7,40         | -12,98        | <b>-1,82</b>  | <b>0,009</b>     | 6          | 307  | <b>30,40</b>  | <b>80,5%</b>   | <b>&lt;0,001</b> | <b>-6,42</b>  | <b>-11,90</b> | <b>-0,93</b>  | <b>0,022</b>     |
| <i>Dose &gt; 10<sup>10</sup> &amp; ≤ 10<sup>11</sup></i> | 12         | 750  | 0,00         | 0,0%           | 0,569            | -1,31         | -3,07         | 0,45          | 0,145            | 10         | 668  | 0,00          | 0,0%           | 0,930            | -0,67         | -2,13         | 0,80          | 0,373            |
| <i>Dose &gt; 10<sup>11</sup> &amp; ≤ 10<sup>12</sup></i> | 4          | 211  | <b>31,26</b> | <b>77,0%</b>   | <b>0,004</b>     | -1,08         | -7,69         | 5,53          | 0,749            | 3          | 167  | 6,09          | 67,9%          | 0,044            | 1,65          | -1,92         | 5,22          | 0,364            |
| Pill                                                     | 15         | 822  | <b>43,78</b> | <b>93,6%</b>   | <b>&lt;0,001</b> | <b>-7,94</b>  | <b>-11,86</b> | <b>-4,03</b>  | <b>&lt;0,001</b> | 12         | 696  | <b>37,72</b>  | <b>95,8%</b>   | <b>&lt;0,001</b> | <b>-8,54</b>  | <b>-12,66</b> | <b>-4,41</b>  | <b>&lt;0,001</b> |
| FM & Y                                                   | 7          | 341  | 0,90         | 8,2%           | 0,366            | 0,90          | -1,54         | 3,34          | 0,469            | 7          | 341  | 0,00          | 0,0%           | 0,534            | 0,19          | -1,20         | 1,58          | 0,790            |

|                    | ALAT (U/l) |     |              |                |                  |               |               |              |                  |     | ASAT (U/l) |              |                |                  |               |               |              |                  |  |
|--------------------|------------|-----|--------------|----------------|------------------|---------------|---------------|--------------|------------------|-----|------------|--------------|----------------|------------------|---------------|---------------|--------------|------------------|--|
|                    | RCT        | n   | $\tau^2$     | I <sup>2</sup> | P(het)           | E             | lb            | ub           | P                | RCT | n          | $\tau^2$     | I <sup>2</sup> | P(het)           | E             | lb            | ub           | P                |  |
| 1 species          | 12         | 672 | 0,00         | 0,0%           | 0,530            | -0,42         | -2,14         | 1,30         | 0,632            | 10  | 590        | 0,00         | 0,0%           | 0,484            | 0,15          | -1,02         | 1,31         | 0,484            |  |
| 2 species          | 4          | 163 | <b>19,92</b> | <b>61,9%</b>   | <b>0,049</b>     | 0,05          | -5,46         | 5,55         | 0,987            | 4   | 163        | 17,38        | 58,1%          | 0,067            | -0,18         | -5,59         | 5,23         | 0,949            |  |
| 3 or more species  | 10         | 631 | <b>39,40</b> | <b>94,9%</b>   | <b>&lt;0,001</b> | <b>-4,40</b>  | <b>-7,58</b>  | <b>-1,22</b> | <b>&lt;0,001</b> | 9   | 587        | <b>33,39</b> | <b>96,4%</b>   | <b>&lt;0,001</b> | <b>-10,90</b> | <b>-15,39</b> | <b>-6,41</b> | <b>&lt;0,001</b> |  |
| <i>B. bif.</i>     | 3          | 245 | 0,00         | 0,00%          | 0,403            | -2,72         | -6,58         | 1,14         | 0,167            | 3   | 245        | 0,00         | 0,00%          | 0,885            | -3,01         | -6,81         | 0,79         | 0,120            |  |
| <i>B. brev.</i>    | 8          | 435 | <b>46,81</b> | <b>92,5%</b>   | <b>&lt;0,001</b> | <b>-9,97</b>  | <b>-15,48</b> | <b>-4,46</b> | <b>&lt;0,001</b> | 7   | 391        | <b>66,73</b> | <b>93,8%</b>   | <b>&lt;0,001</b> | <b>-10,75</b> | <b>-17,65</b> | <b>-3,86</b> | <b>0,002</b>     |  |
| <i>B. lac.</i>     | 6          | 490 | 7,19         | 47,9%          | 0,087            | <b>-3,94</b>  | <b>-7,09</b>  | <b>-0,80</b> | <b>0,014</b>     | 5   | 446        | 0,00         | 0,0%           | 0,731            | -1,35         | -3,26         | 0,56         | 0,167            |  |
| <i>B. lon.</i>     | 10         | 579 | <b>44,37</b> | <b>95,3%</b>   | <b>&lt;0,001</b> | <b>-8,61</b>  | <b>-13,28</b> | <b>-3,95</b> | <b>&lt;0,001</b> | 10  | 579        | <b>34,98</b> | <b>96,1%</b>   | <b>&lt;0,001</b> | <b>-9,64</b>  | <b>-14,04</b> | <b>-5,24</b> | <b>&lt;0,001</b> |  |
| <i>S. ther.</i>    | 9          | 486 | <b>41,47</b> | <b>95,5%</b>   | <b>&lt;0,001</b> | <b>-9,92</b>  | <b>-14,67</b> | <b>-5,17</b> | <b>&lt;0,001</b> | 8   | 442        | <b>35,05</b> | <b>96,9%</b>   | <b>&lt;0,001</b> | <b>-10,43</b> | <b>-15,17</b> | <b>-5,69</b> | <b>&lt;0,001</b> |  |
| <i>Lc. lac.</i>    | 2          | 115 | 11,11        | 42,9%          | 0,186            | 4,19          | -2,77         | 11,15        | 0,238            | 2   | 115        | 13,04        | 63,7%          | 0,097            | 0,70          | -5,56         | 6,95         | 0,828            |  |
| <i>L. acid.</i>    | 11         | 664 | 40,04        | 90,2%          | <b>&lt;0,001</b> | -8,23         | -12,55        | -3,91        | <b>&lt;0,001</b> | 10  | 620        | <b>52,32</b> | <b>91,2%</b>   | <b>&lt;0,001</b> | <b>-8,93</b>  | <b>-14,13</b> | <b>-3,73</b> | <b>0,001</b>     |  |
| <i>L. del.</i>     | 8          | 463 | <b>44,15</b> | <b>96,2%</b>   | <b>&lt;0,001</b> | <b>-10,05</b> | <b>-15,20</b> | <b>-4,90</b> | <b>&lt;0,001</b> | 8   | 463        | <b>33,13</b> | <b>96,6%</b>   | <b>&lt;0,001</b> | <b>-11,38</b> | <b>-16,27</b> | <b>-6,49</b> | <b>&lt;0,001</b> |  |
| <i>L. gas.</i>     | 3          | 189 | 0,00         | 0,0%           | 0,933            | 0,60          | -2,11         | 3,31         | 0,664            | 2   | 127        | 0,00         | 0,0%           | 0,956            | 0,14          | -1,61         | 1,90         | 0,872            |  |
| <i>L. rham.</i>    | 9          | 506 | <b>40,35</b> | <b>95,1%</b>   | <b>&lt;0,001</b> | <b>-11,67</b> | <b>-16,64</b> | <b>-6,70</b> | <b>&lt;0,001</b> | 8   | 486        | <b>33,45</b> | <b>96,8%</b>   | <b>&lt;0,001</b> | <b>-11,22</b> | <b>-15,79</b> | <b>-6,64</b> | <b>&lt;0,001</b> |  |
| <i>L. cas. gr.</i> | 10         | 602 | <b>46,34</b> | <b>95,6%</b>   | <b>&lt;0,001</b> | <b>-8,48</b>  | <b>-13,19</b> | <b>-3,76</b> | <b>&lt;0,001</b> | 9   | 558        | <b>37,51</b> | <b>96,8%</b>   | <b>&lt;0,001</b> | <b>-9,84</b>  | <b>-14,54</b> | <b>-5,13</b> | <b>&lt;0,001</b> |  |
| <i>L. plan.</i>    | 5          | 251 | <b>26,58</b> | <b>62,1%</b>   | <b>0,032</b>     | -1,64         | -7,81         | 4,52         | 0,601            | 4   | 207        | 9,84         | 60,3%          | 0,056            | 0,94          | -3,09         | 4,97         | 0,648            |  |



|                                   | GGT (U/l) |     |              |                |                  |              |               |              |                  |
|-----------------------------------|-----------|-----|--------------|----------------|------------------|--------------|---------------|--------------|------------------|
|                                   | RCT       | n   | $\tau^2$     | I <sup>2</sup> | P(het)           | E            | lb            | ub           | P                |
| All studies                       | 14        | 816 | <b>25,43</b> | <b>86,9%</b>   | <b>&lt;0,001</b> | -3,14        | -6,60         | 0,33         | 0,076            |
| Excl. low quality studies         | 10        | 657 | <b>25,78</b> | <b>79,5%</b>   | <b>&lt;0,001</b> | <b>-4,48</b> | <b>-8,56</b>  | <b>-0,40</b> | <b>0,031</b>     |
| Excl. low/medium quality studies  | 8         | 551 | <b>27,35</b> | <b>83,6%</b>   | <b>&lt;0,001</b> | <b>-4,76</b> | <b>-9,14</b>  | <b>-0,38</b> | <b>0,033</b>     |
| Excl. studies with children       | 14        | 816 | <b>25,43</b> | <b>86,9%</b>   | <b>&lt;0,001</b> | -3,14        | -6,60         | 0,33         | 0,076            |
| Excl. studies with pregnant women | 14        | 816 | <b>25,43</b> | <b>86,9%</b>   | <b>&lt;0,001</b> | -3,14        | -6,60         | 0,33         | 0,076            |
| Excl. studies with gastric bypass | 13        | 736 | <b>25,99</b> | <b>87,9%</b>   | <b>&lt;0,001</b> | -3,08        | -6,66         | 0,51         | 0,093            |
| Excl. studies from Iran           | 12        | 728 | 0,00         | 0,0%           | 0,985            | -0,97        | -2,10         | 0,17         | 0,094            |
| NW                                | 4         | 147 | 0,00         | 0,0%           | 0,632            | -0,12        | -2,43         | 2,20         | 0,923            |
| OW                                | 5         | 292 | 0,00         | 0,0%           | 0,998            | -1,11        | -2,44         | 0,23         | 0,105            |
| OB                                | 5         | 377 | 1,56         | 12,4%          | 0,335            | <b>-8,90</b> | <b>-11,31</b> | <b>-6,48</b> | <b>&lt;0,001</b> |
| IFG                               | 3         | 122 | 10,47        | 22,3%          | 0,276            | -6,26        | -13,57        | 1,04         | 0,093            |
| NAFLD                             | 4         | 243 | <b>35,30</b> | <b>96,1%</b>   | <b>&lt;0,001</b> | -6,45        | -12,98        | 0,08         | 0,053            |
| Pill                              | 6         | 349 | <b>33,85</b> | <b>93,6%</b>   | <b>&lt;0,001</b> | -5,63        | -11,44        | 0,19         | 0,058            |
| FM & Y                            | 6         | 258 | 0,00         | 0,0%           | 0,872            | -0,25        | -2,40         | 1,90         | 0,820            |
| 1 species                         | 9         | 553 | 0,00         | 0,0%           | 0,970            | -1,01        | -3,25         | 1,23         | 0,378            |
| 2 species                         | 2         | 56  | <b>58,07</b> | <b>86,0%</b>   | <b>0,007</b>     | -4,44        | -15,81        | 6,92         | 0,443            |
| 3 or more species                 | 3         | 207 | <b>36,71</b> | <b>97,4%</b>   | <b>&lt;0,001</b> | -5,23        | -12,78        | 2,33         | 0,175            |
| <i>B. brev.</i>                   | 3         | 176 | 0,00         | 0,0%           | 0,564            | <b>-9,77</b> | <b>-11,16</b> | <b>-8,37</b> | <b>&lt;0,001</b> |
| <i>B. lac.</i>                    | 2         | 209 | 0,00         | 0,0%           | 0,727            | -3,47        | -9,94         | 3,02         | 0,295            |
| <i>B. lon.</i>                    | 5         | 263 | <b>34,12</b> | <b>95,3%</b>   | <b>&lt;0,001</b> | -4,84        | -10,55        | 0,86         | 0,096            |
| <i>S. ther.</i>                   | 4         | 227 | <b>35,17</b> | <b>96,4%</b>   | <b>&lt;0,001</b> | -3,60        | -9,97         | 2,77         | 0,268            |
| <i>L. acid.</i>                   | 3         | 168 | 0,00         | 0,0%           | 0,637            | <b>-9,82</b> | <b>-11,20</b> | <b>-8,45</b> | <b>&lt;0,001</b> |
| <i>L. del.</i>                    | 3         | 147 | <b>36,21</b> | <b>97,6%</b>   | <b>&lt;0,001</b> | -3,49        | -10,48        | 3,50         | 0,328            |
| <i>L. gas.</i>                    | 3         | 189 | 0,00         | 0,0%           | 0,705            | -0,59        | -5,92         | 4,74         | 0,828            |
| <i>L. rham.</i>                   | 3         | 207 | <b>36,71</b> | <b>97,4%</b>   | <b>&lt;0,001</b> | -5,23        | -12,78        | 2,33         | 0,175            |
| <i>L. cas. gr.</i>                | 3         | 207 | <b>36,71</b> | <b>97,4%</b>   | <b>&lt;0,001</b> | -5,23        | -12,78        | 2,33         | 0,175            |

Heading: RCT, number of trials; n, number of subjects;  $\tau^2$ , between study variance;  $I^2$ , heterogeneity measure; P(het), P value of heterogeneity test relating on  $I^2$  measure; E, estimate; lb, lower boundary of 95% confidence interval; ub, upper boundary of confidence interval; P value of Wald test.

Outcome: ALAT, alanine aminotransferase; ASAT, aspartate aminotransferase; GGT, gamma-glutamyl transferase.

Populations: NW, normal weight; OW, overweight; OB, obese; IFG, impaired fasting glucose; T2DM, type 2 diabetes mellitus; NAFLD, nonalcoholic fatty liver disease.

Food form: FM & Y, fermented milk or yogurt.

Species: *B. bif.*, *Bifidobacterium bifidum*; *B. brev.*, *Bifidobacterium breve*; *B. lac.*, *Bifidobacterium animalis* subsp. *lactis*; *B. lon.*, *Bifidobacterium longum*; *S. ther.*, *Streptococcus salivarius* subsp. *thermophilus*; *Lc. lac.*, *Lactococcus lactis*; *L. hel.*, *Lactobacillus helveticus*; *L. acid.*, *Lactobacillus acidophilus*; *L. del.*, *Lactobacillus delbrueckii*; *L. gas.*, *Lactobacillus gasseri*; *L. reut.*, *Lactobacillus reuteri*; *L. fer.*, *Lactobacillus fermentum*; *L. rham.*, *Lactobacillus rhamnosus*; *L. cas. gr.*, *Lactobacillus casei* or *paracasei*; *L. cur.*, *Lactobacillus curvatus*; *L. sal.*, *Lactobacillus salivarius*; *L. plan.*, *Lactobacillus plantarum*.

SI conversion factors: To convert ALAT, ASAT, and GGT to  $\mu\text{kat/L}$ , multiply values by 0.016.

Supplementary Figures

Supplementary Figure 1 Funnel plot, body weight.

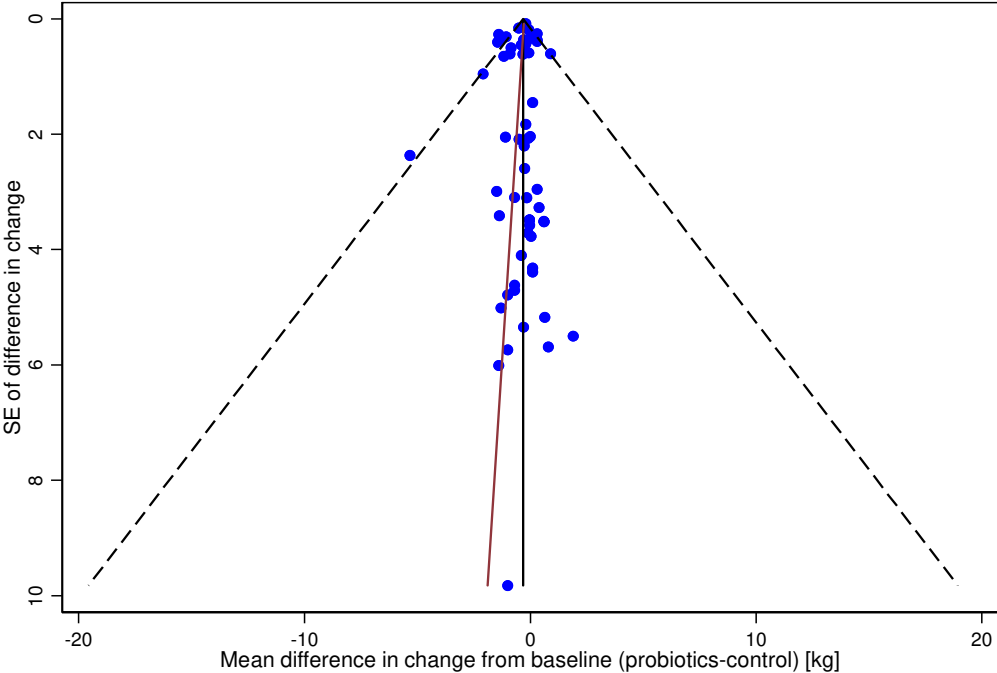

Supplementary Figure 2 Galbraith's plot for small study effects, body weight.

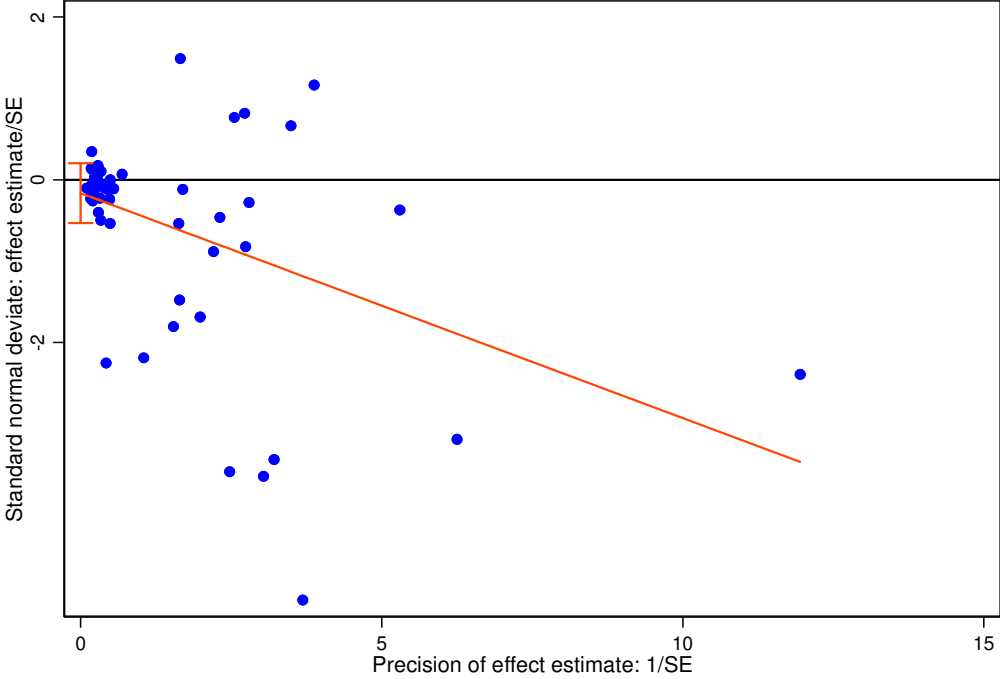

Legend Figure 2:

Hypothesis tests for small study effects: Egger's test: bias coefficient=-0.17, P=0.371. Begg's test: adj. Kendall's score=-60, P=0.687.



Supplementary Figure 4 Funnel plot, body mass index.

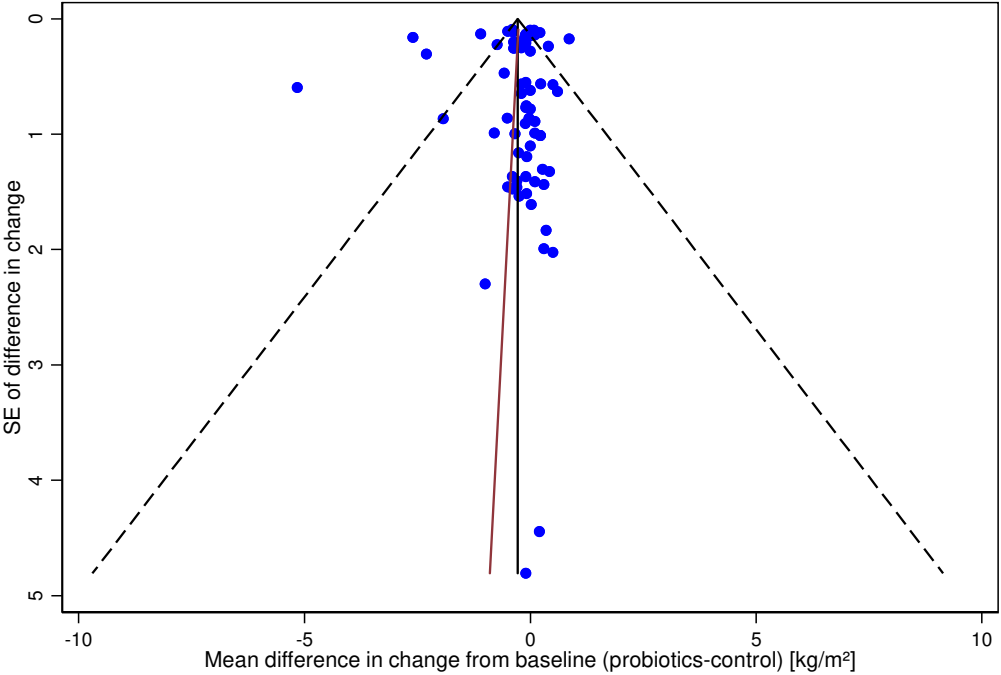

Supplementary Figure 5 Galbraith's plot for small study effects, body mass index.

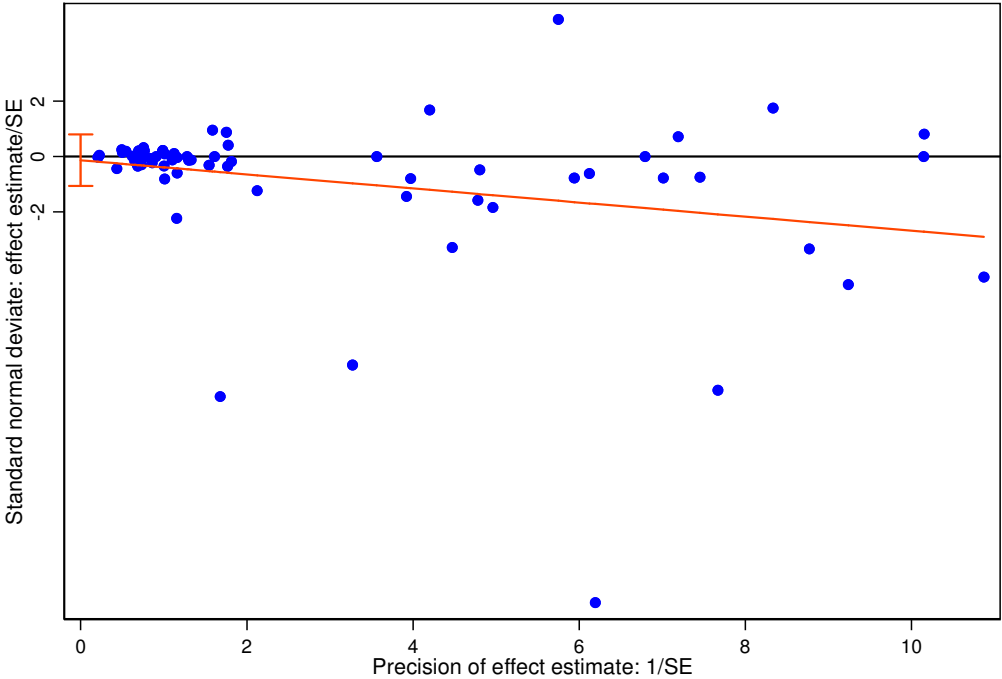

Legend Figure 5:

Hypothesis tests for small study effects: Egger's test: bias coefficient=-0.13, P=0.776. Begg's test: adj. Kendall's score=-309, P=0.976.

# Supplementary Figure 6 Overall estimate of probiotics on body mass index.

Studies: 68, N=4015, Pop: PO:all subjects, Food: all, Genus: all, Strain: all, Dose: all

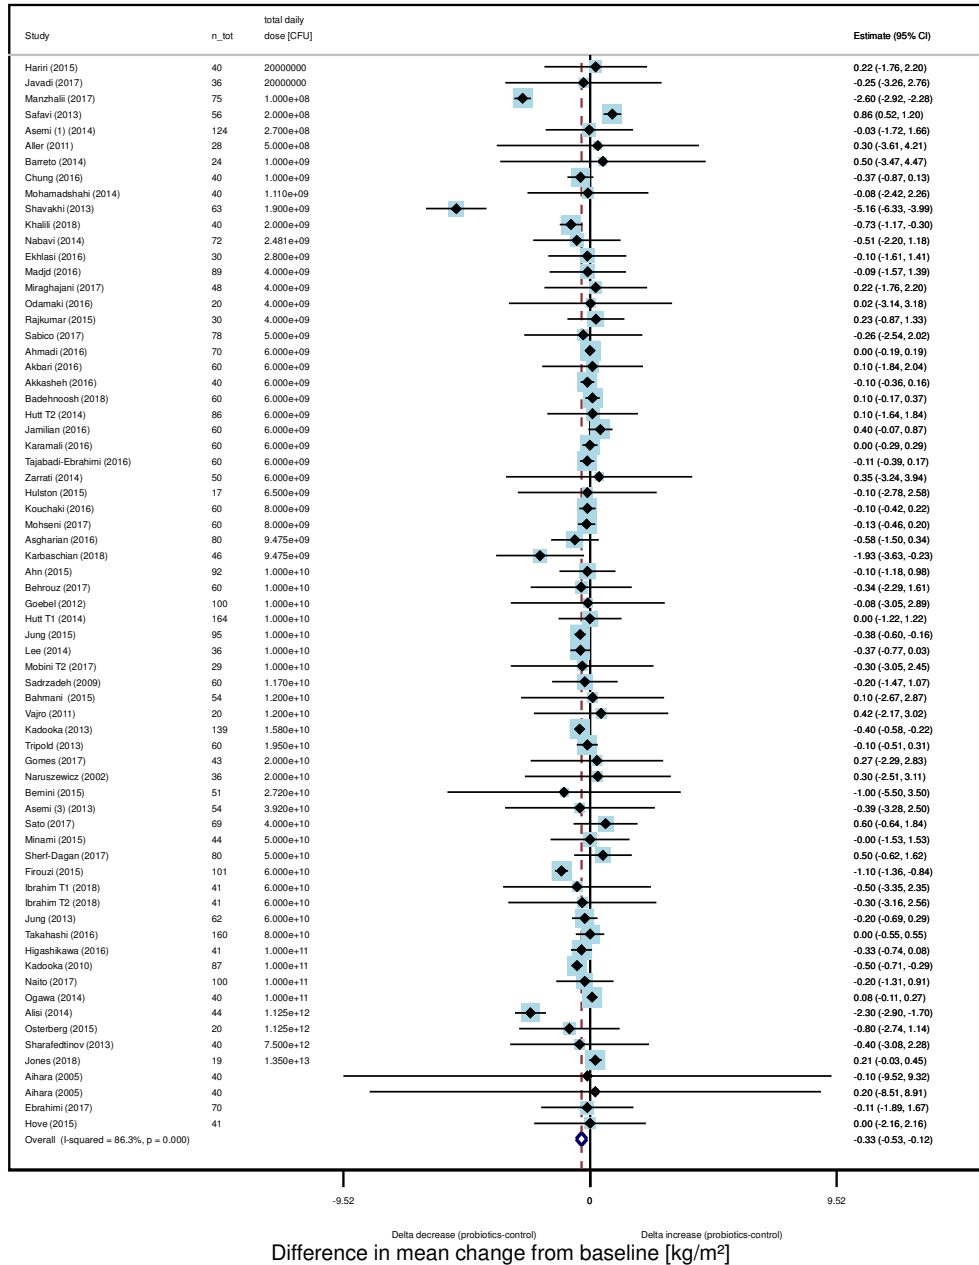



Supplementary Figure 7 Funnel plot, waist circumference.

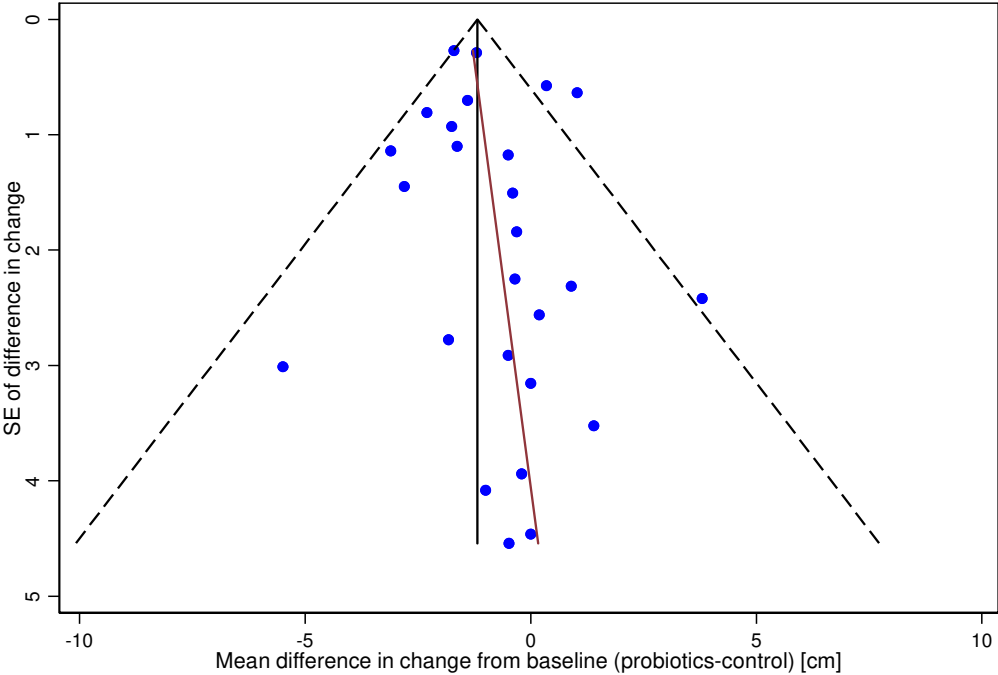

Supplementary Figure 8 Galbraith's plot for small study effects, waist circumference.

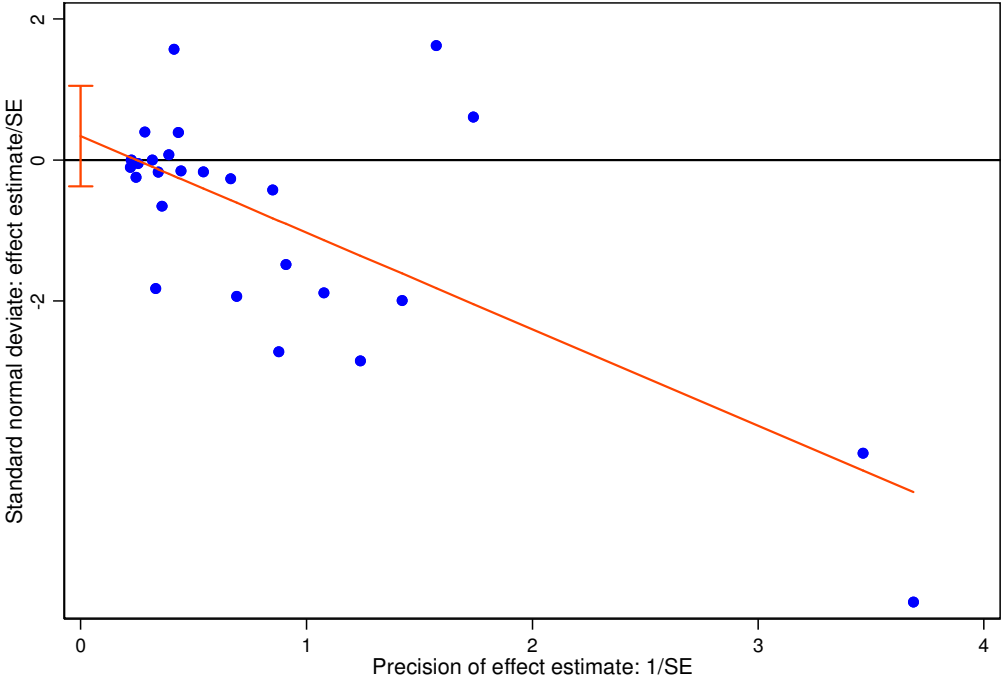

Legend Figure 8:

Hypothesis tests for small study effects: Egger's test: bias coefficient=0.34, P=0.337. Begg's test: adj. Kendall's score=27, P=0.552.

### Supplementary Figure 9 Overall estimate of probiotics effect on waist circumference.

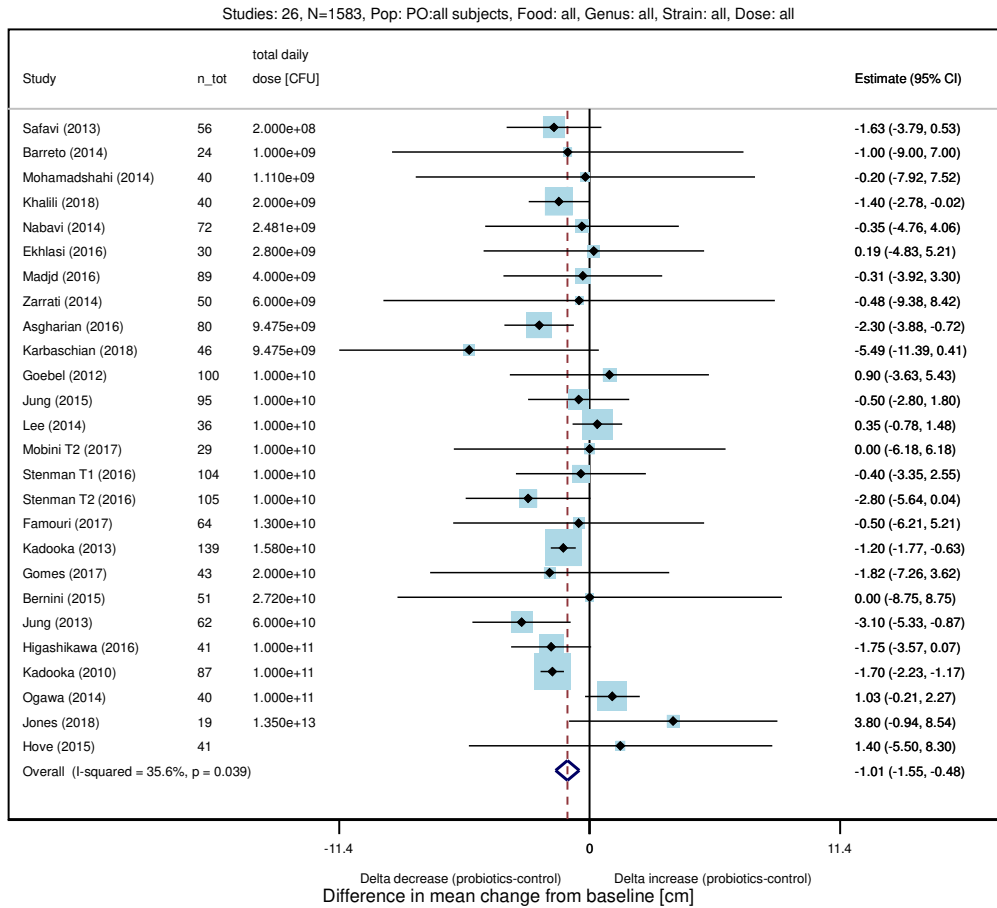

Supplementary Figure 10 Funnel plot, body fat mass.

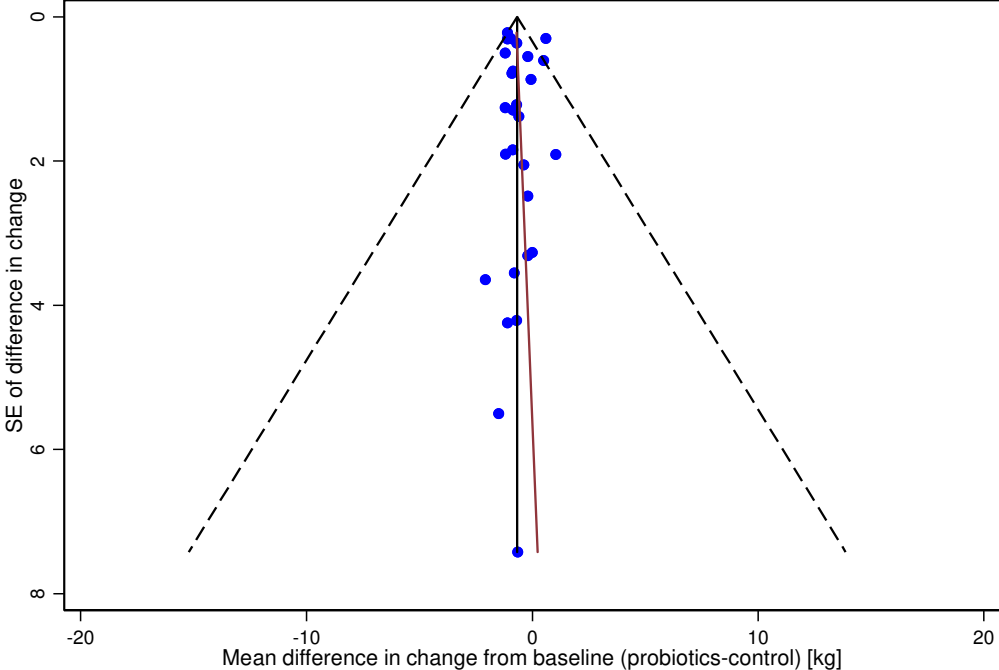

Supplementary Figure 11 Galbraith's plot for small study effects, body fat mass.

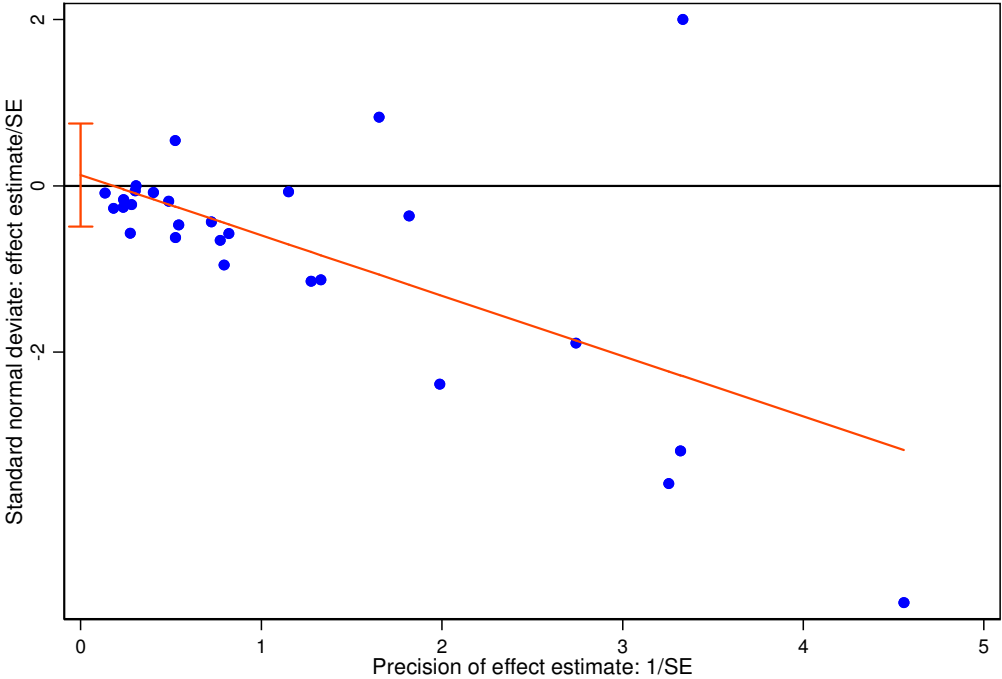

Legend Figure 11:

Hypothesis tests for small study effects: Egger's test: bias coefficient=0.13, P=0.671. Begg's test: adj. Kendall's score=6, P=0.323.



Supplementary Figure 13 Funnel plot, visceral adipose tissue.

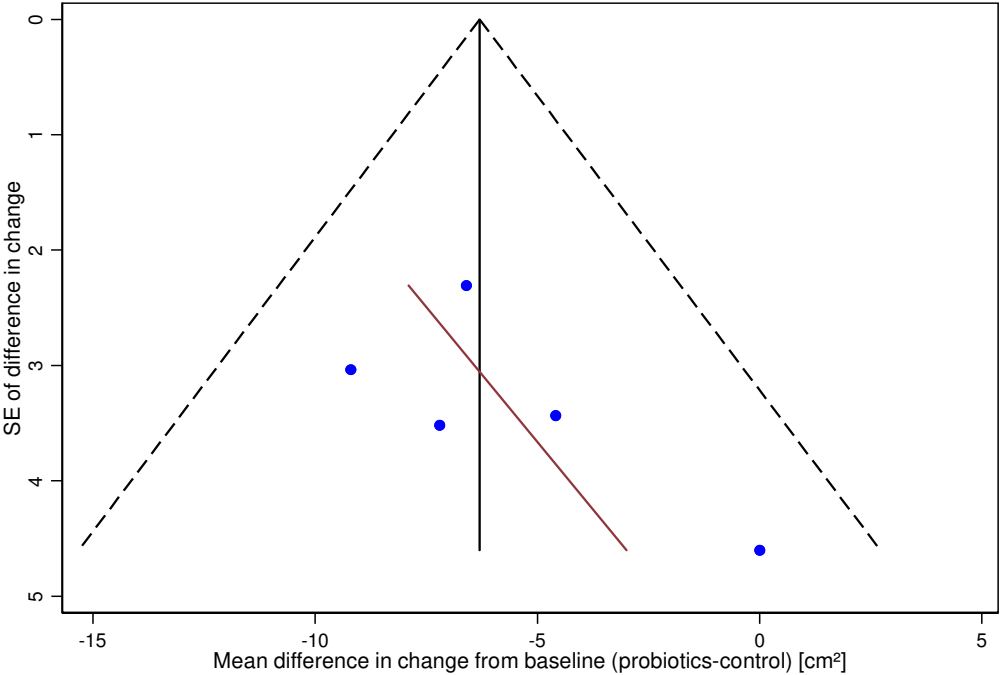

Supplementary Figure 14 Galbraith's plot for small study effects, visceral adipose tissue.

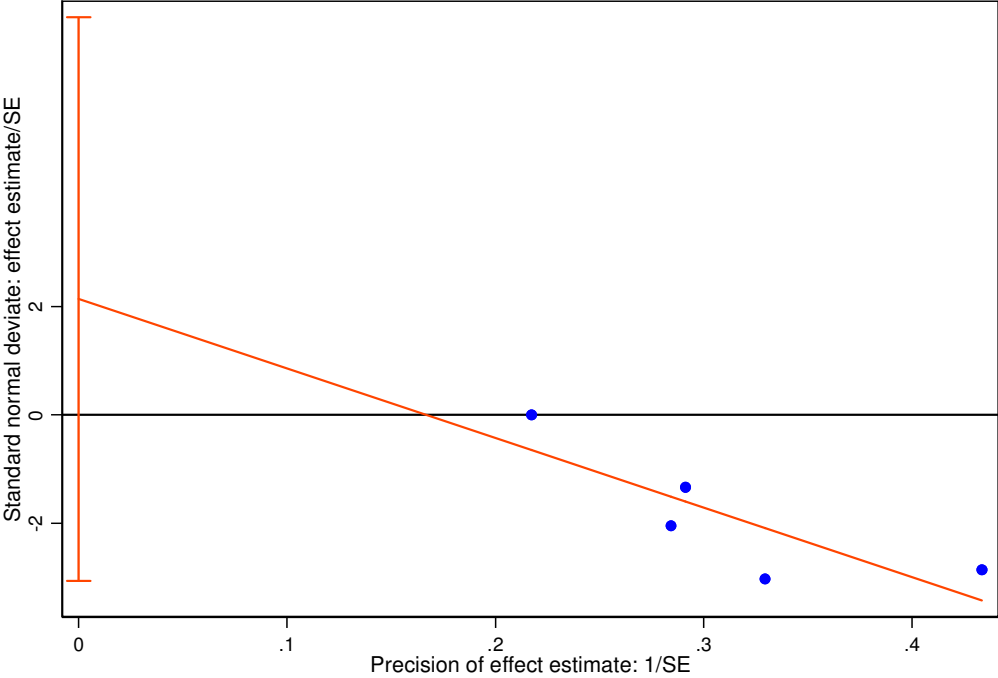

Legend Figure 14:

Hypothesis tests for small study effects: Egger's test: bias coefficient=2.14, P=0.282. Begg's test: adj. Kendall's score=4, P=0.327.





Supplementary Figure 16 Funnel plot, subcutaneous adipose tissue.

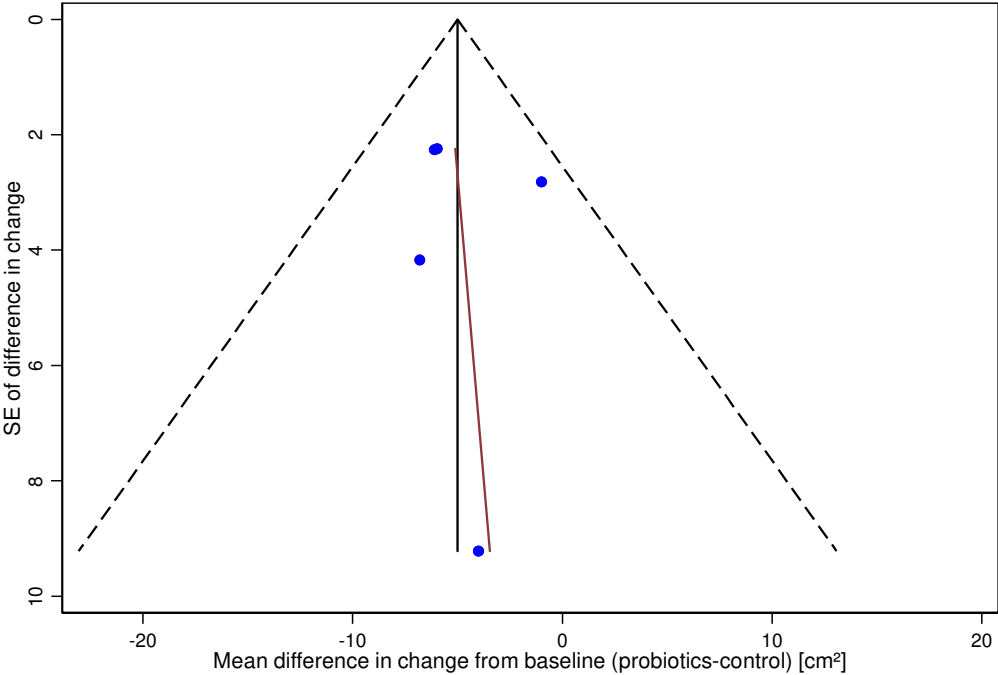

Supplementary Figure 17 Galbraith's plot for small study effects, subcutaneous adipose tissue.

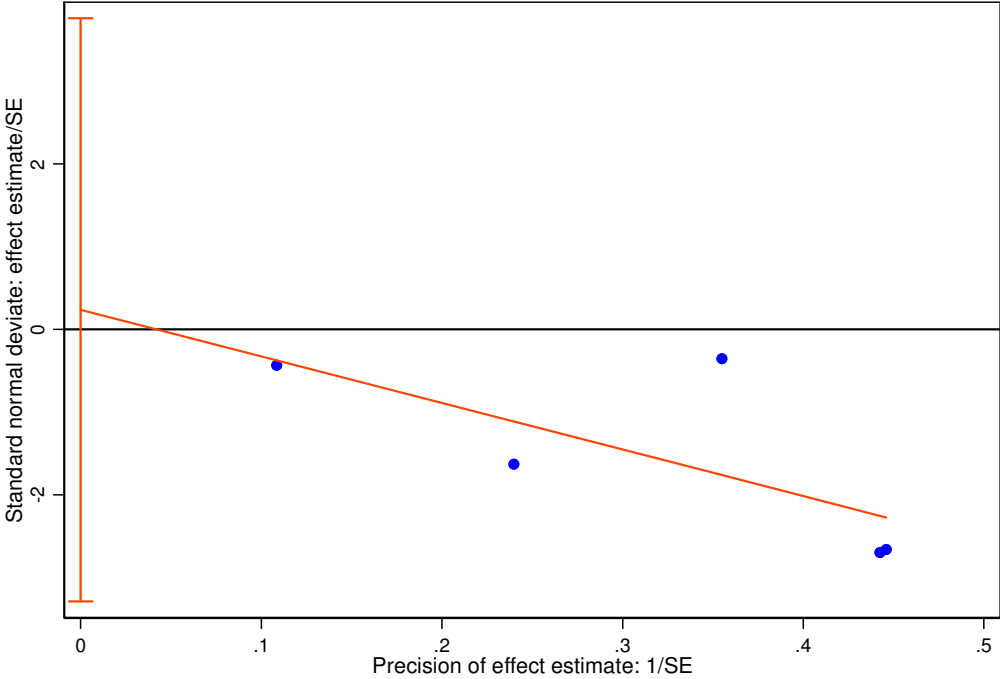

Legend Figure 17:

Hypothesis tests for small study effects: Egger's test: bias coefficient=0.24, P=0.845. Begg's test: adj. Kendall's score=4, P=0.327.







**Supplementary Figure 21 Estimate of probiotics effect on waist circumference excluding studies conducted in Iran.**

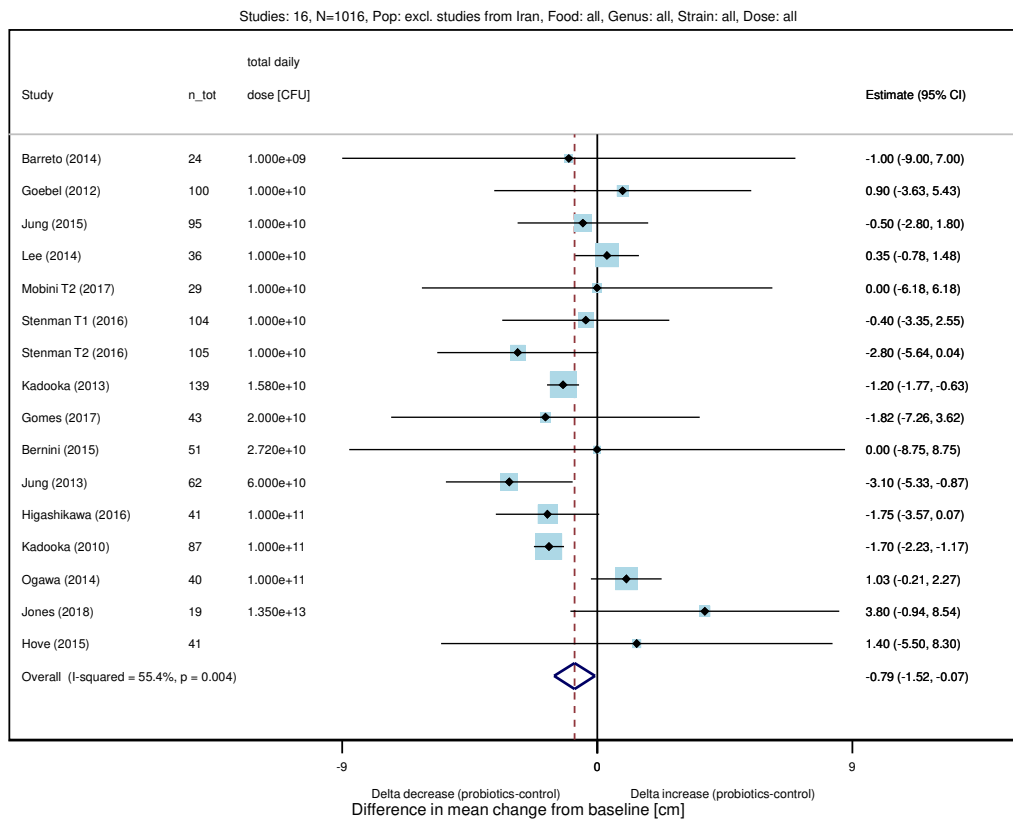

**Supplementary Figure 22 Estimate of probiotics effect on body fat mass excluding studies conducted in Iran.**

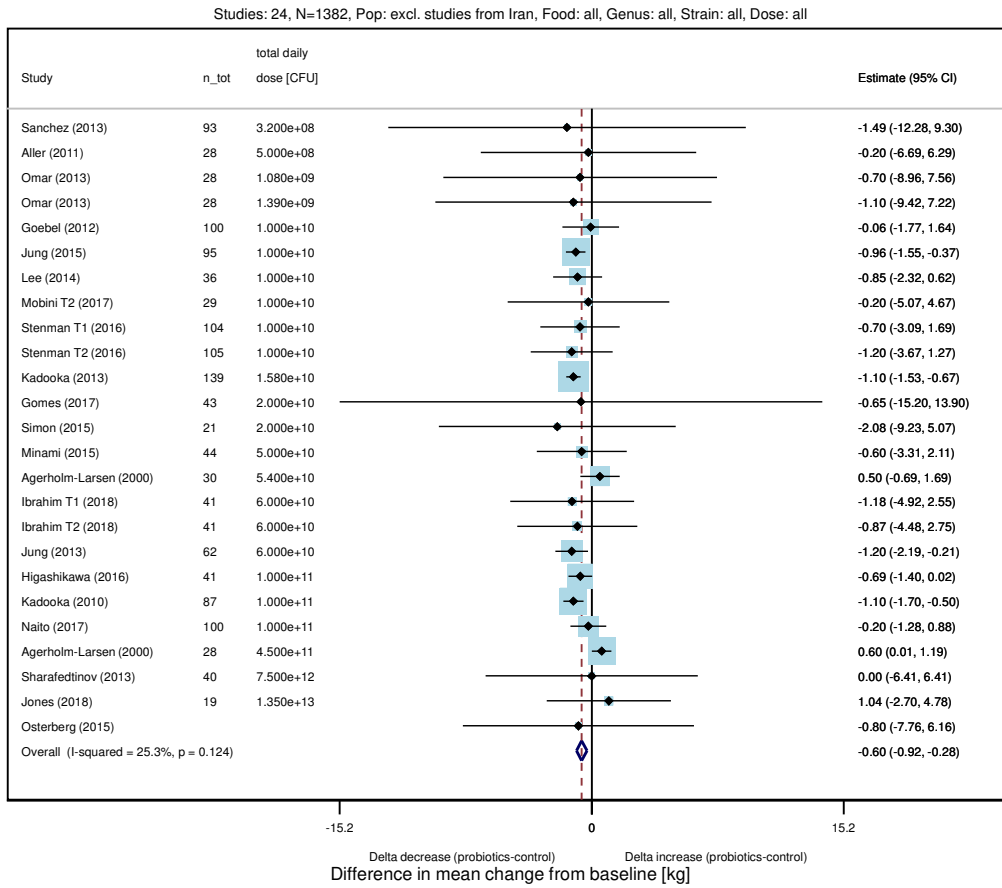



**Supplementary Figure 23 Estimate of probiotics effect on visceral adipose tissue excluding studies conducted in Iran.**

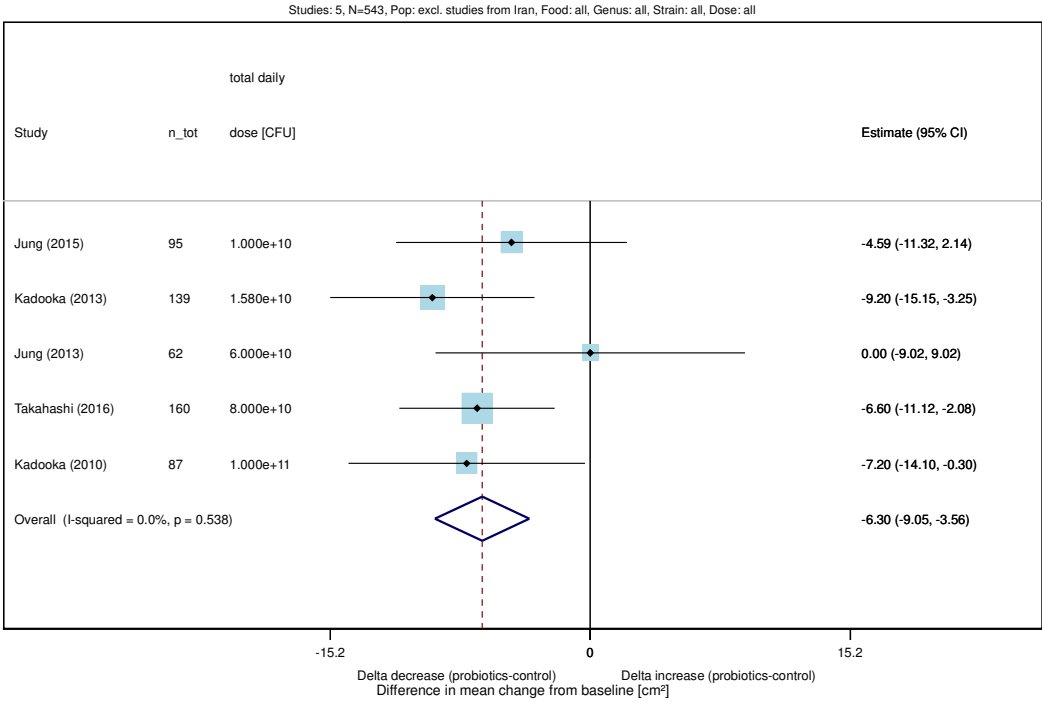

**Supplementary Figure 24 Estimate of probiotics effect on subcutaneous adipose tissue excluding studies conducted in Iran.**

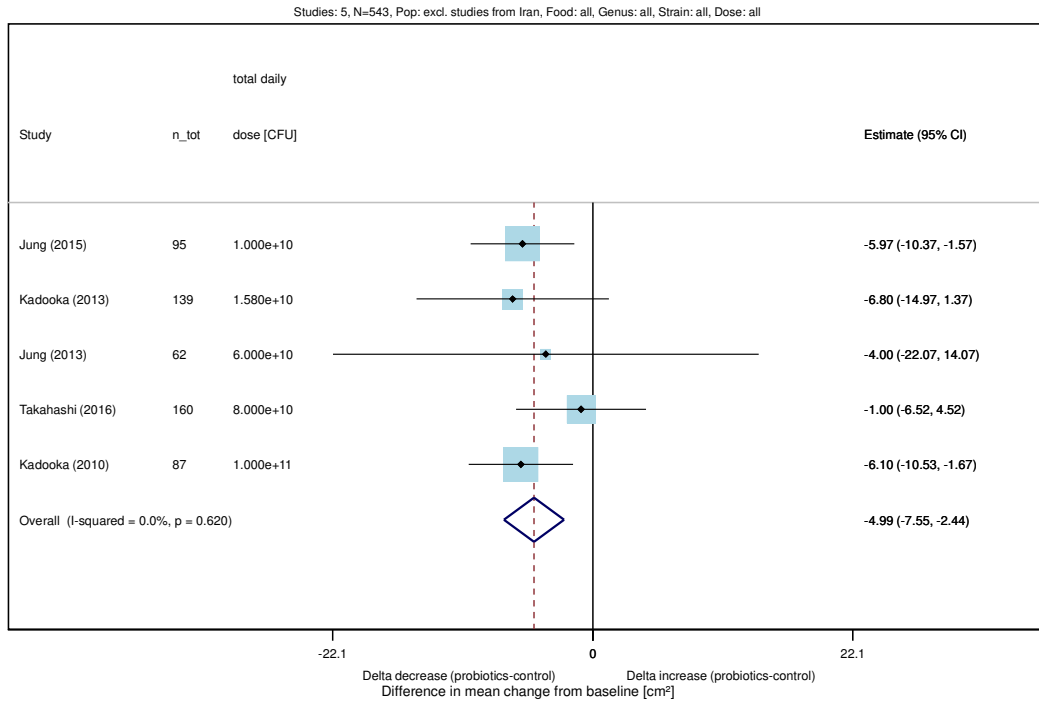

Supplementary Figure 25 Funnel plot, fasting glucose.

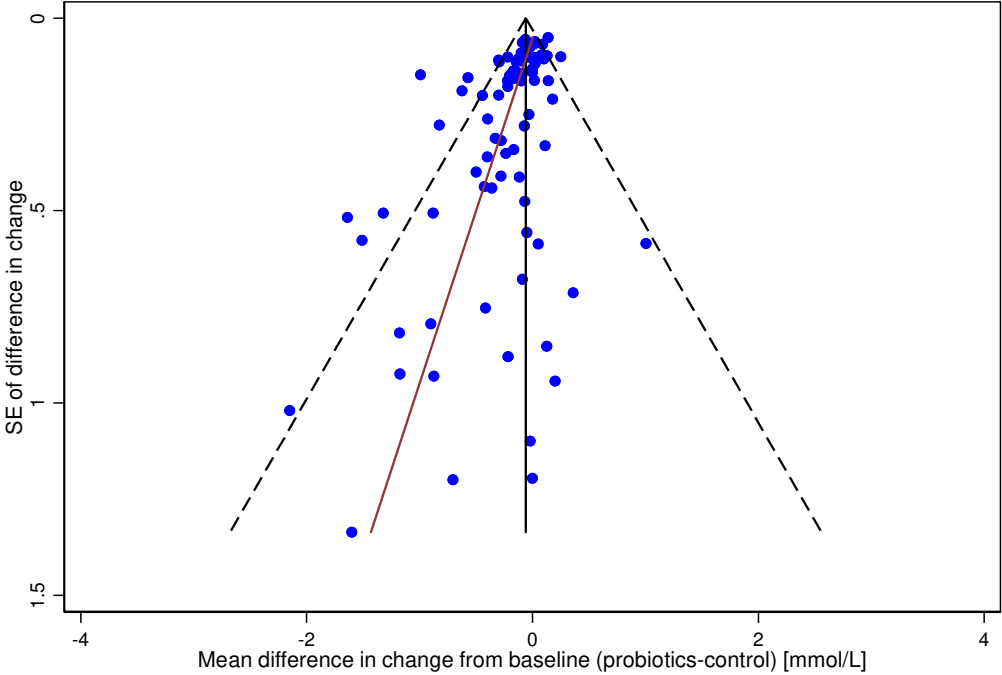

Supplementary Figure 26 Galbraith's plot for small study effects, fasting glucose.

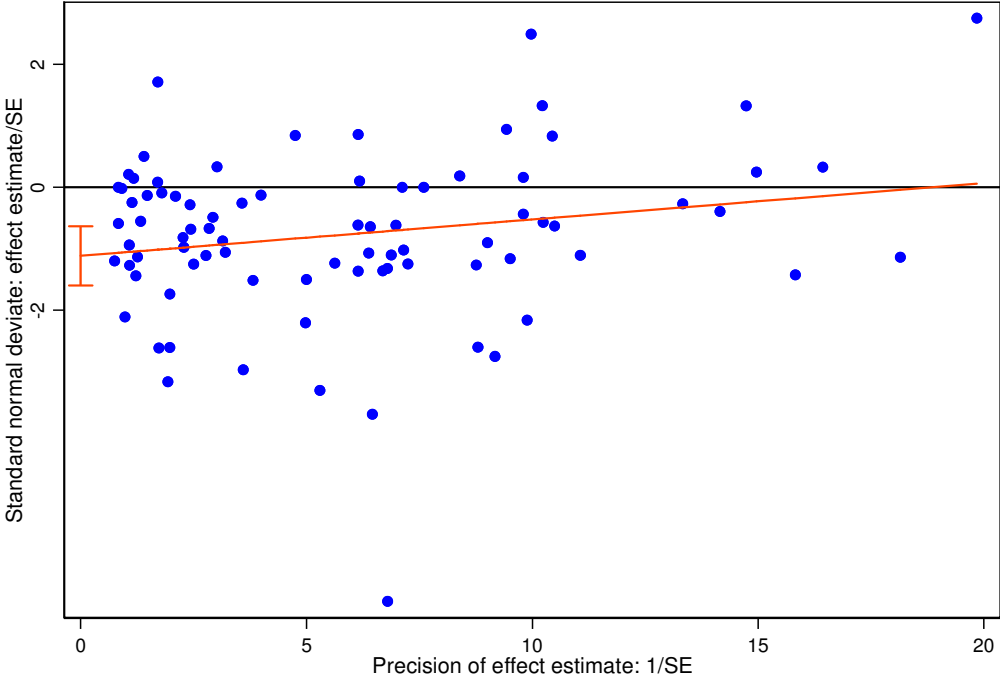

Legend Figure 26:

Hypothesis tests for small study effects: Egger's test: bias coefficient=-1.11, P<0.001. Begg's test: adj. Kendall's score=-710, P=0.005. Filled & trim meta analysis estimator: -0.12 (95%CI: -0.18 to -0.07), P<0.001, no studies filled or excluded.

# Supplementary Figure 27 Overall estimate of probiotics effect on fasting glucose.

Studies: 83, N=5188, Pop: PO:all subjects, Food: all, Genus: all, Strain: all, Dose: all

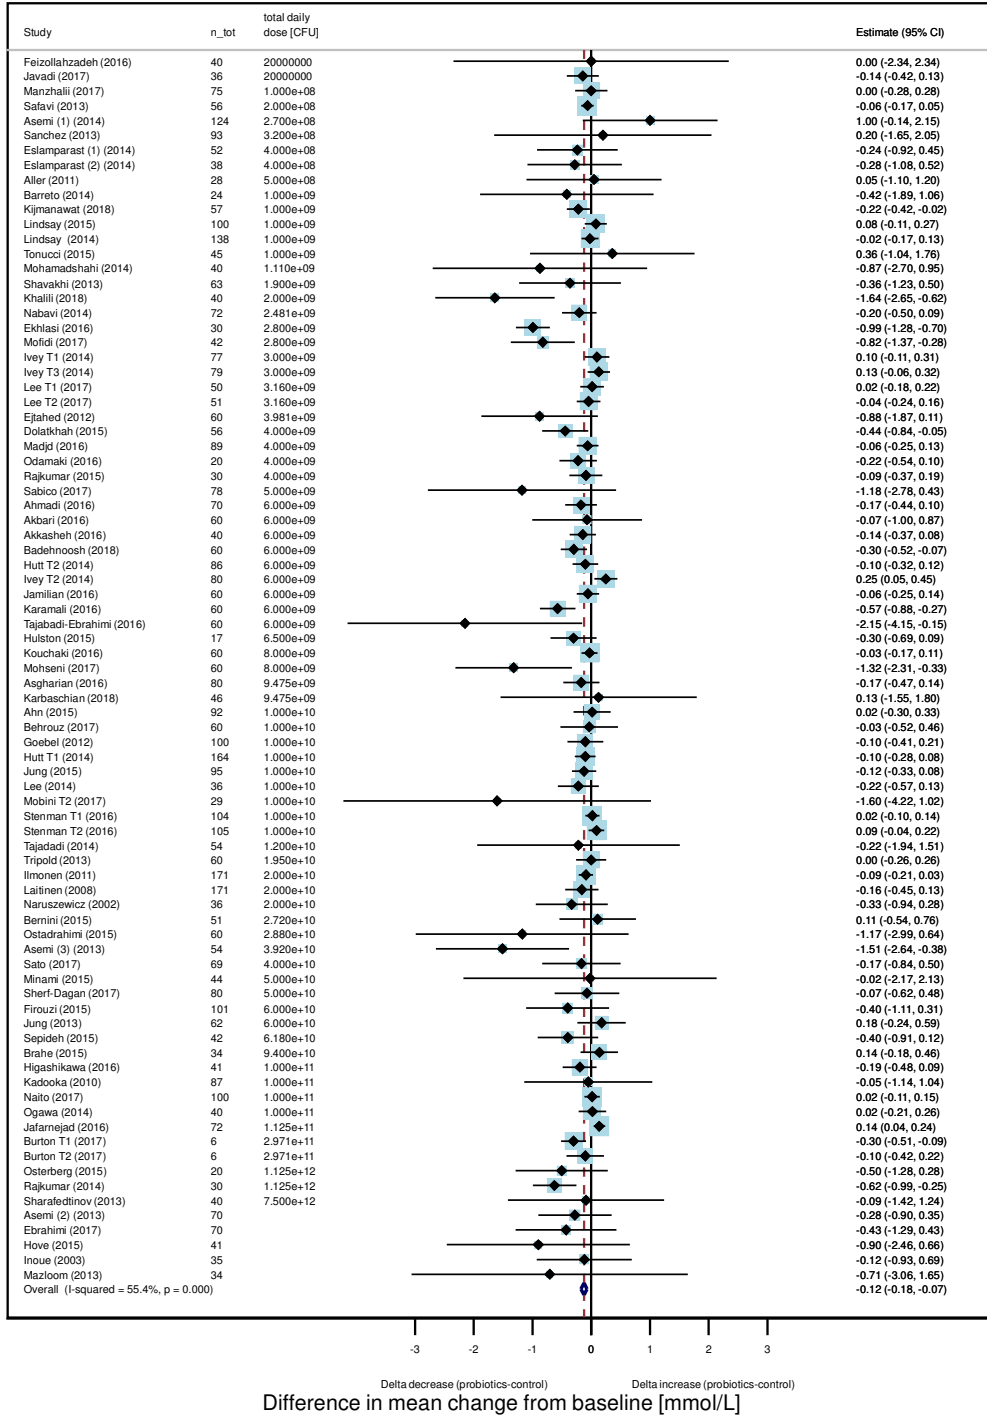

Supplementary Figure 28 Funnel plot, glycated haemoglobin.

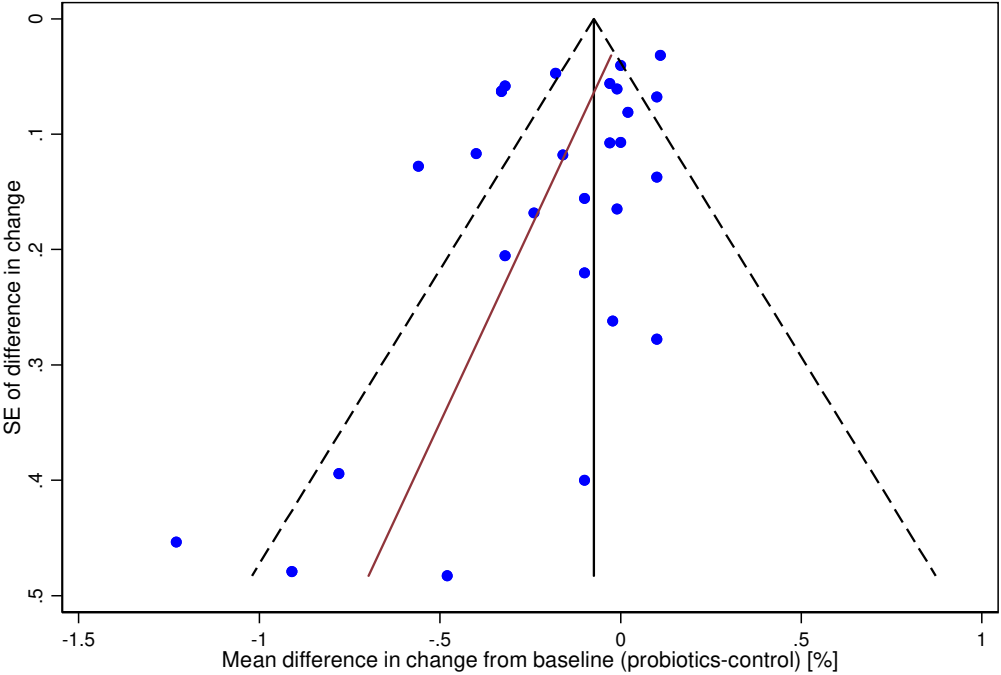

Supplementary Figure 29 Galbraith's plot for small study effects, glycated haemoglobin.

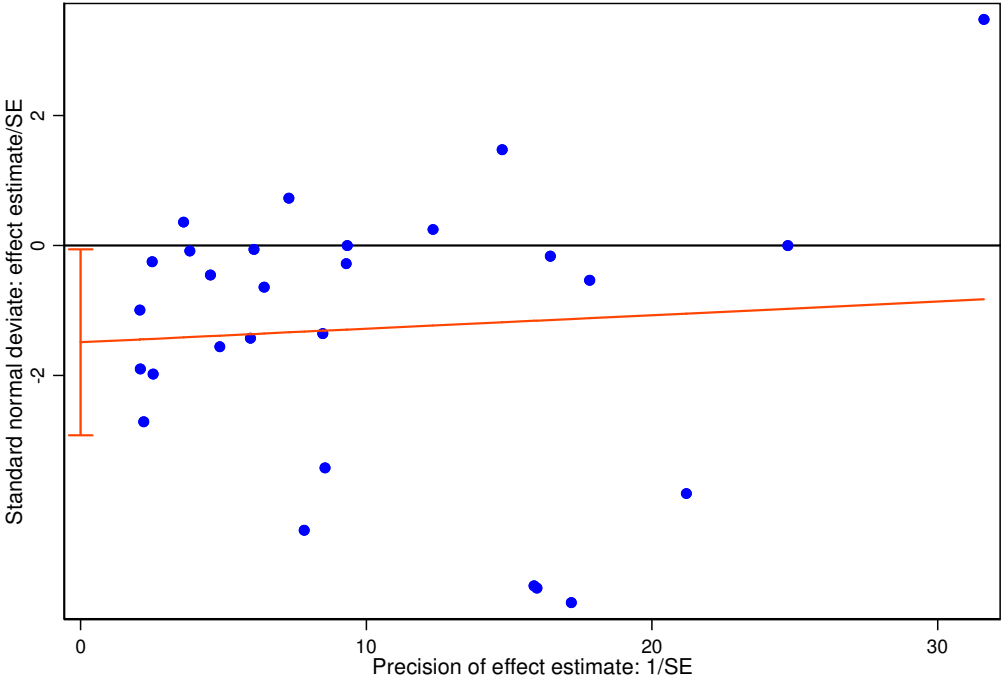

Legend Figure 29:

Hypothesis tests for small study effects: Egger's test: bias coefficient=-1.49, P=0.042. Begg's test: adj. Kendall's score=-68, P=0.179. Filled & trim meta analysis estimators: -0.12 (95%CI: -0.18 to -0.07), P<0.001, no studies filled or excluded.





Supplementary Figure 31 Funnel plot, fasting insulin.

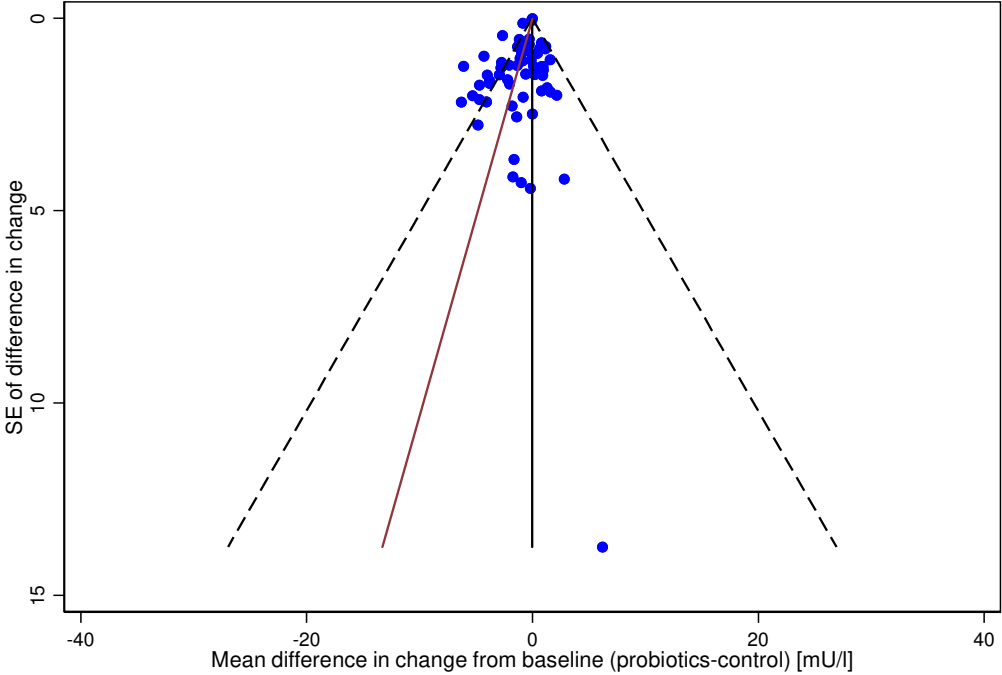

Supplementary Figure 32 Galbraith's plot for small study effects, fasting insulin.

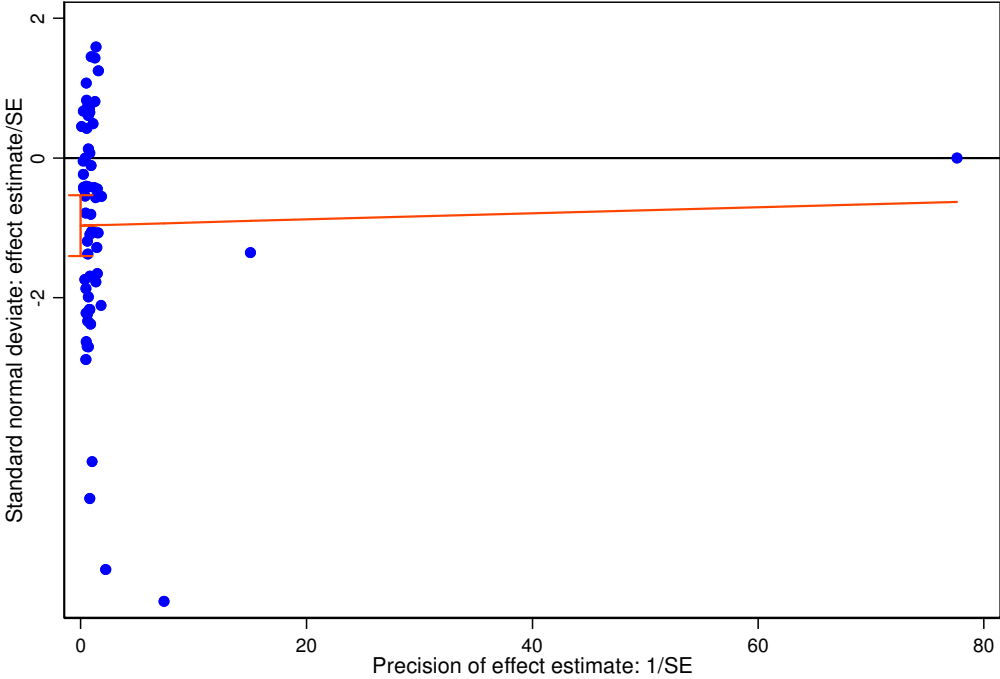

Legend Figure 32:

Hypothesis tests for small study effects: Egger's test: bias coefficient=-0.97,  $P < 0.001$ . Begg's test: adj. Kendall's score=56,  $P = 0.740$ . Filled & trim meta analysis estimators: -0.800 (95%CI: -1.09 to -0.52),  $P < 0.001$ , no studies filled or excluded.

### Supplementary Figure 33 Overall estimate of probiotics effect on fasting insulin.

Studies: 63, N=3854, Pop: PO:all subjects, Food: all, Genus: all, Strain: all, Dose: all

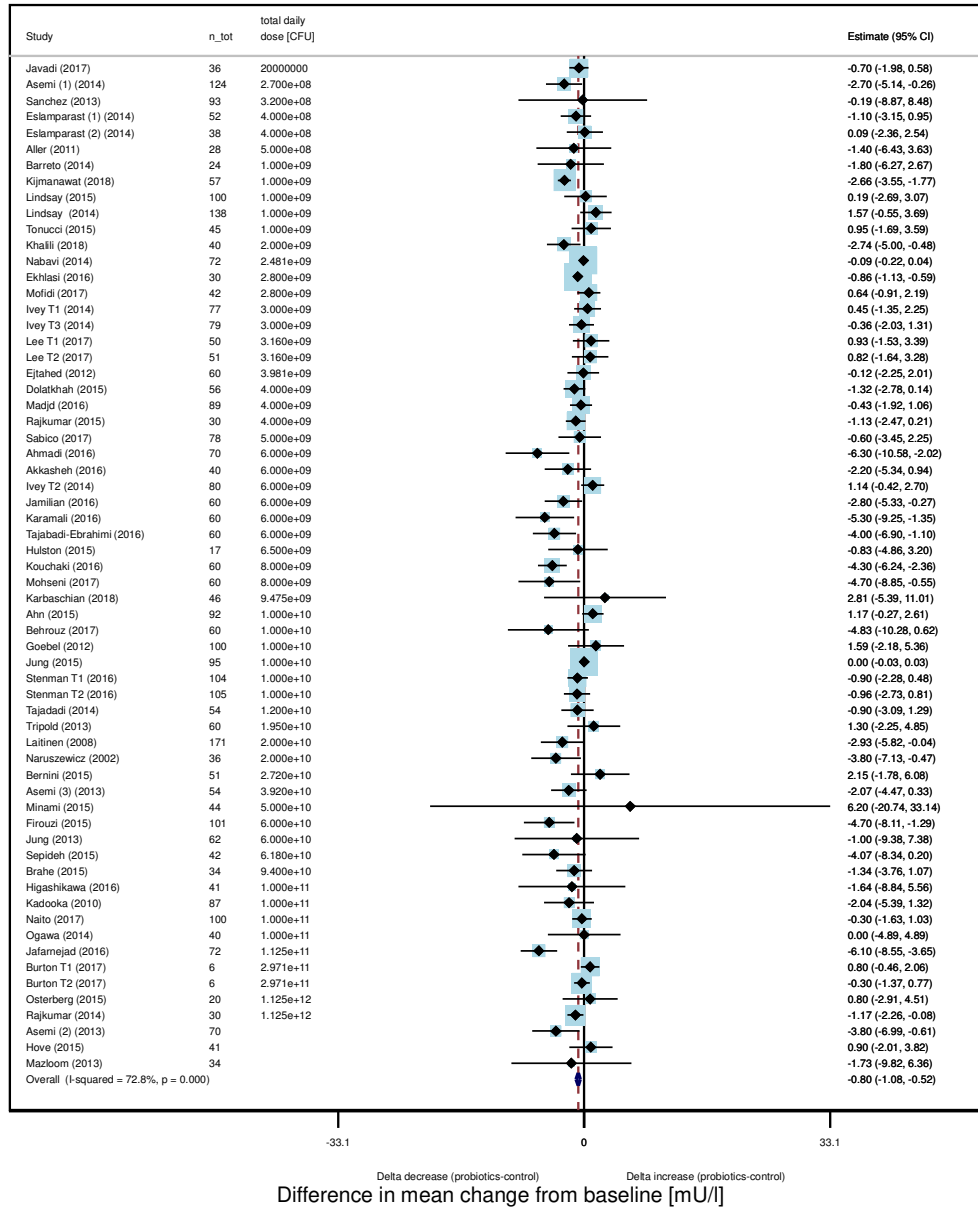

Supplementary Figure 34 Funnel plot, homeostasis model of insulin resistance.

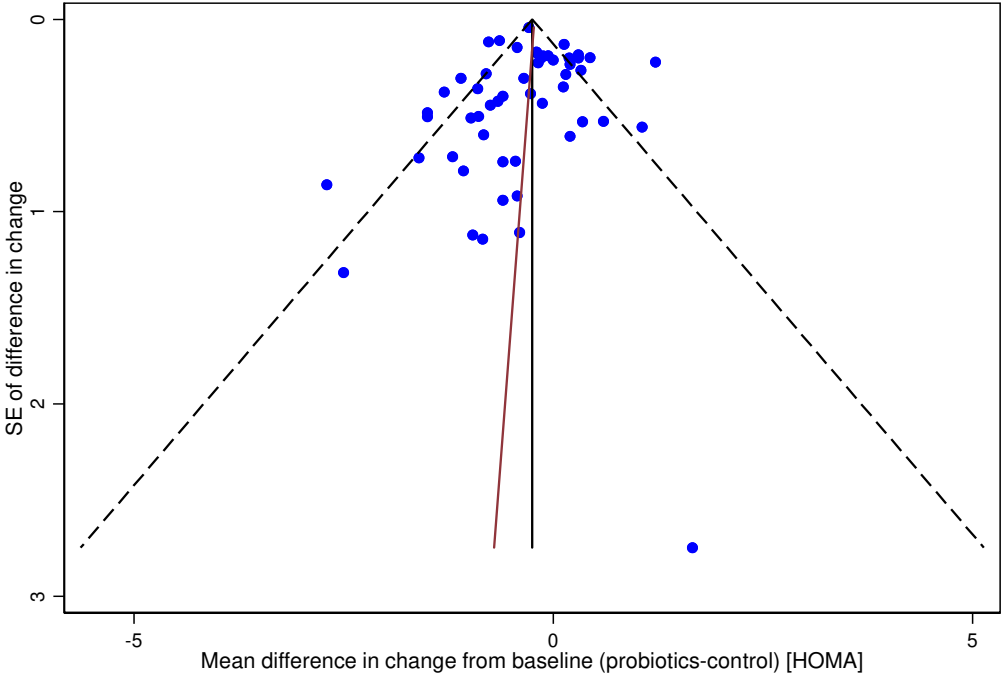

**Supplementary Figure 35 Galbraith's plot for small study effects, homeostasis model of insulin resistance.**

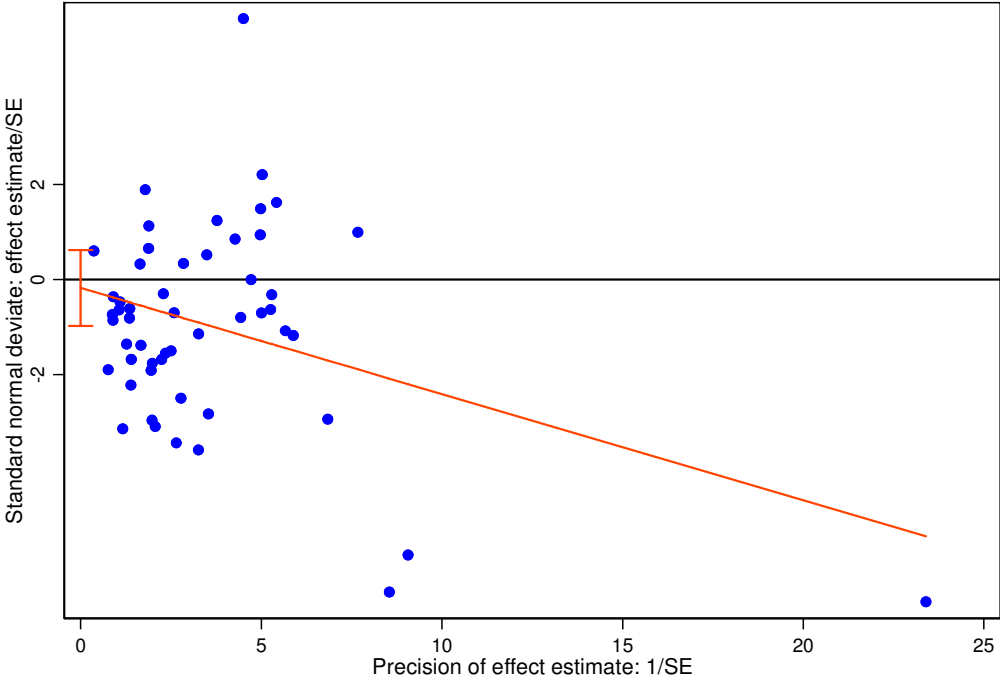

Legend Figure 35:

Hypothesis tests for small study effects: Egger's test: bias coefficient=-0.18, P=0.662. Begg's test: adj. Kendall's score=-226, P=0.083.

# Supplementary Figure 36 Overall estimate of probiotics effect on homeostasis model of insulin resistance.

Studies: 52, N=3513, Pop: PO:all subjects, Food: all, Genus: all, Strain: all, Dose: all

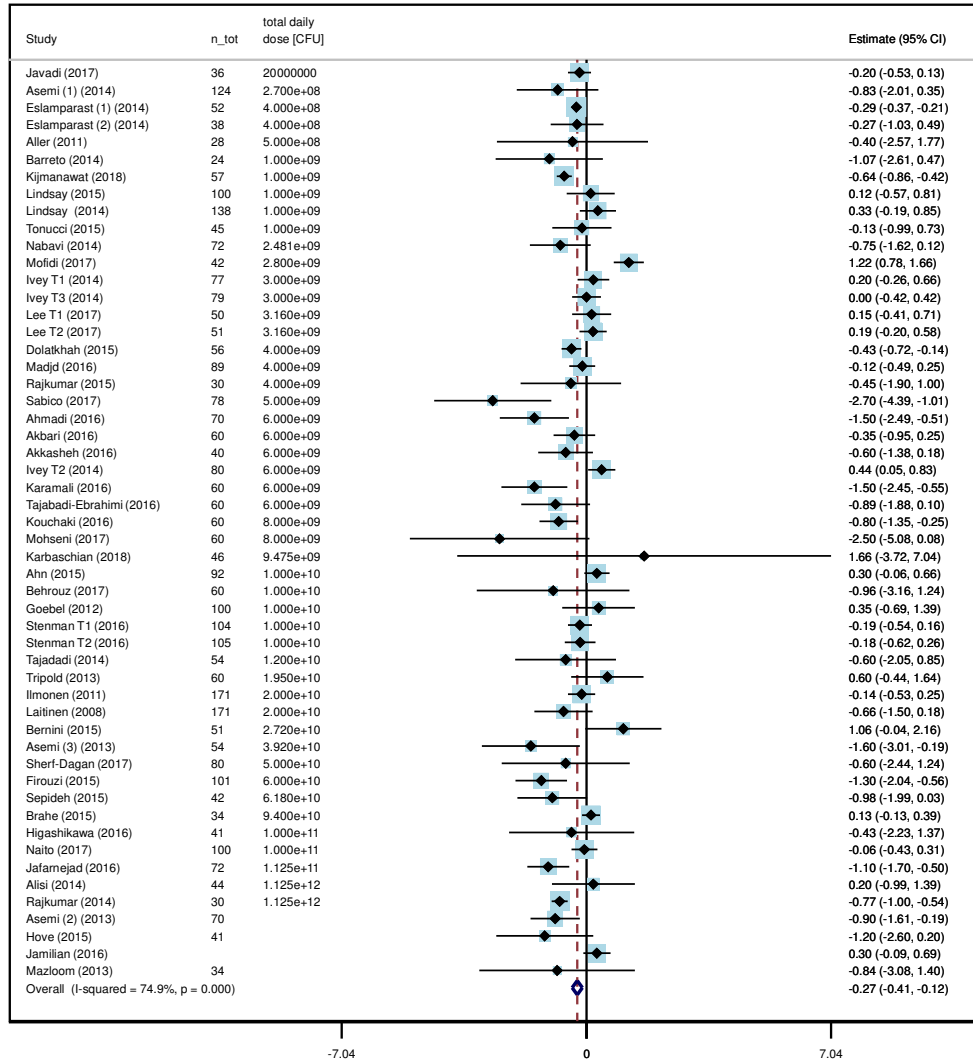

Difference in mean change from baseline [HOMA]

Supplementary Figure 37 Funnel plot, C-reactive protein.

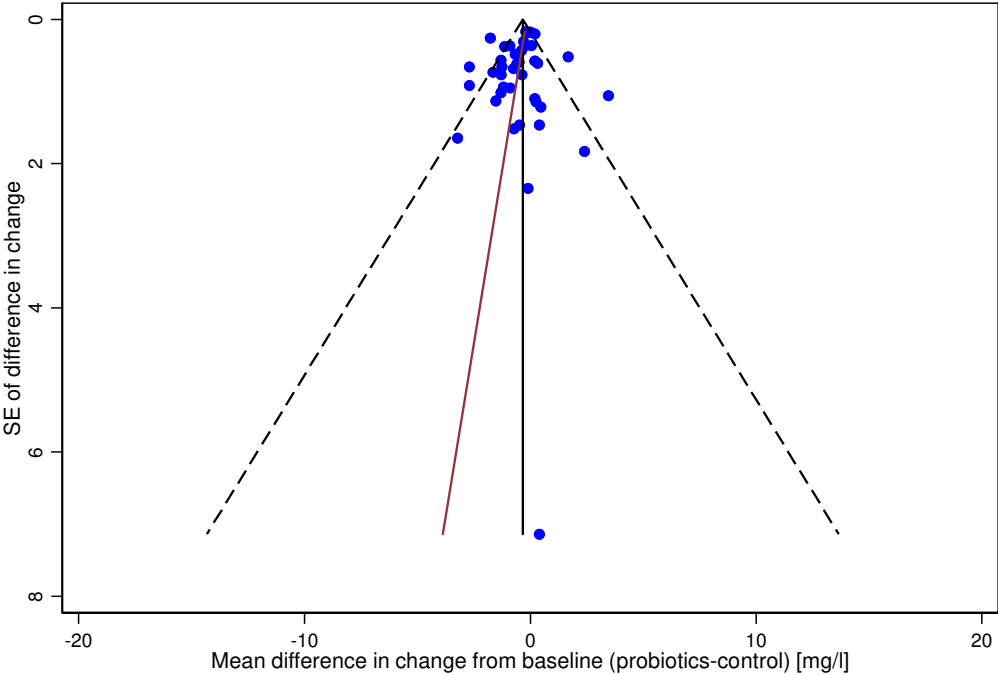

Supplementary Figure 38 Galbraith's plot for small study effects, C-reactive protein.

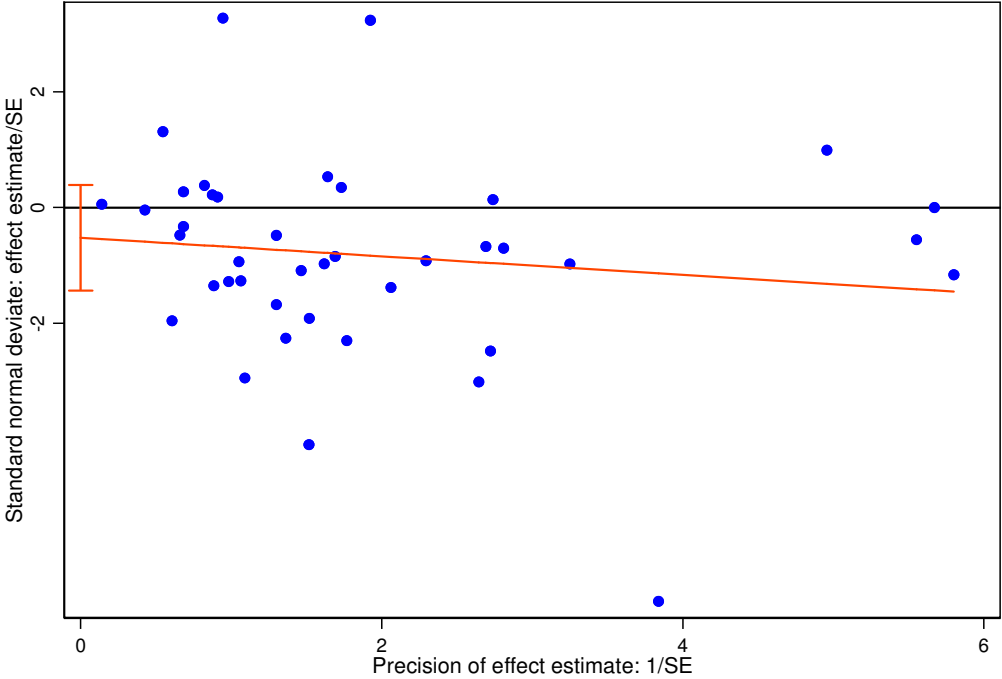

Legend Figure 38:

Hypothesis tests for small study effects: Egger's test: bias coefficient=-0.52, P=0.255. Begg's test: adj. Kendall's score=-51, P=0.567.





**Supplementary Figure 40 Estimate of probiotics effect on fasting glucose excluding studies conducted in Iran.**

Studies: 48, N=3178, Pop: excl. studies from Iran, Food: all, Genus: all, Strain: all, Dose: all

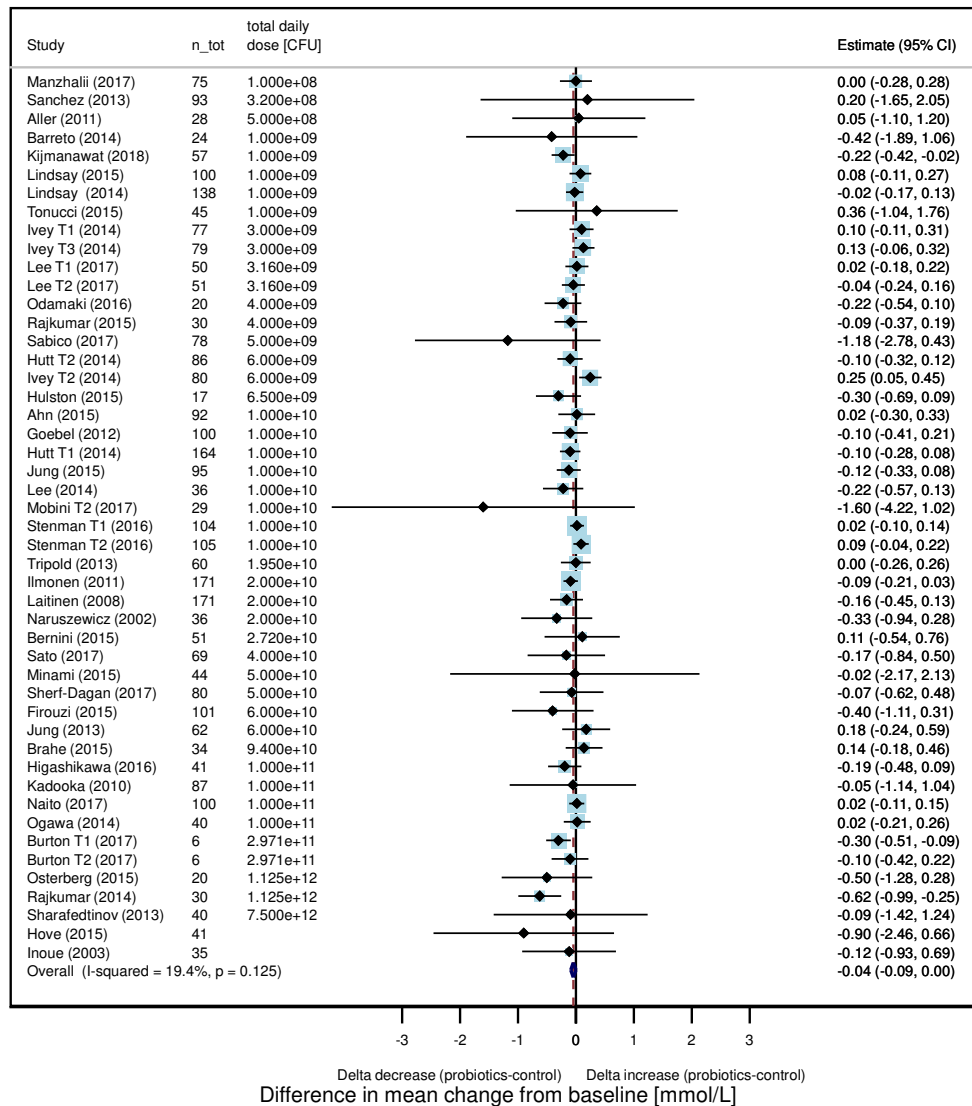

### Supplementary Figure 41 Estimate of probiotics effect on glycated haemoglobin excluding studies conducted in Iran.

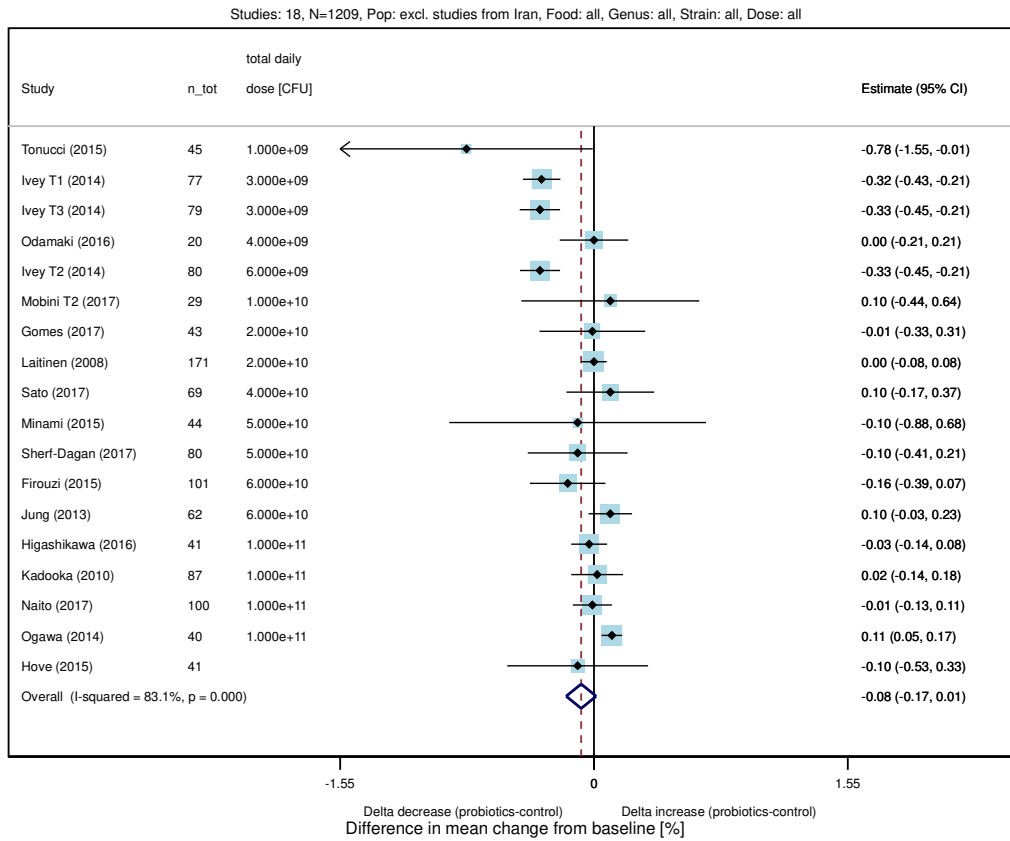

## Supplementary Figure 42 Estimate of probiotics effect on fasting insulin excluding studies conducted in Iran.

Studies: 37, N=2373, Pop: excl. studies from Iran, Food: all, Genus: all, Strain: all, Dose: all

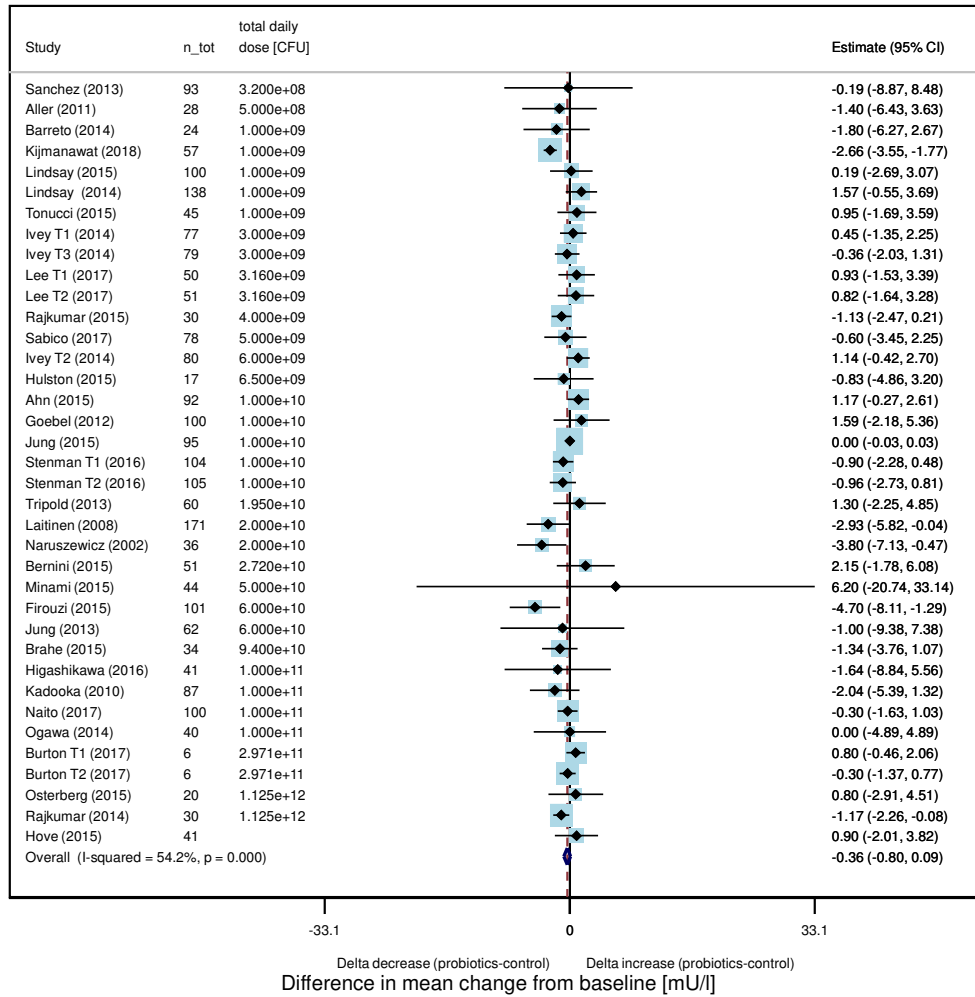

**Supplementary Figure 43 Estimate of probiotics effect on homeostasis model of insulin resistance excluding studies conducted in Iran.**

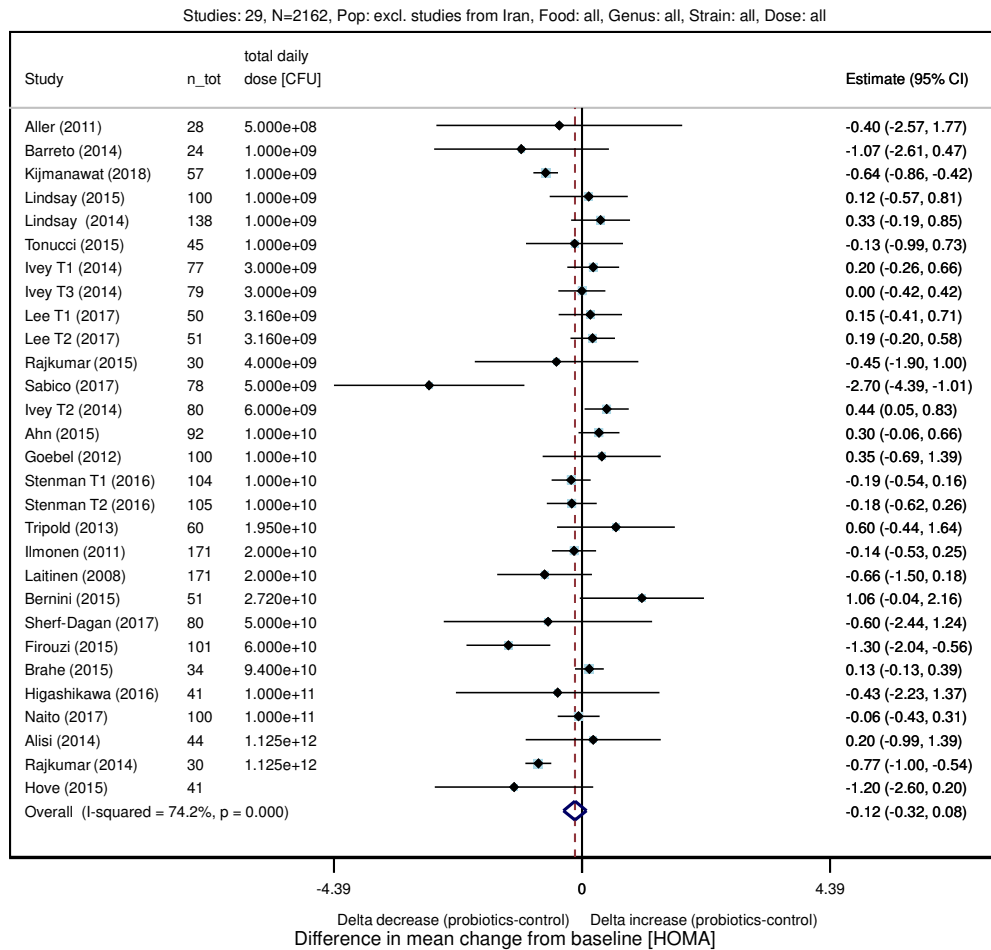



Supplementary Figure 45 Funnel plot, triglycerides.

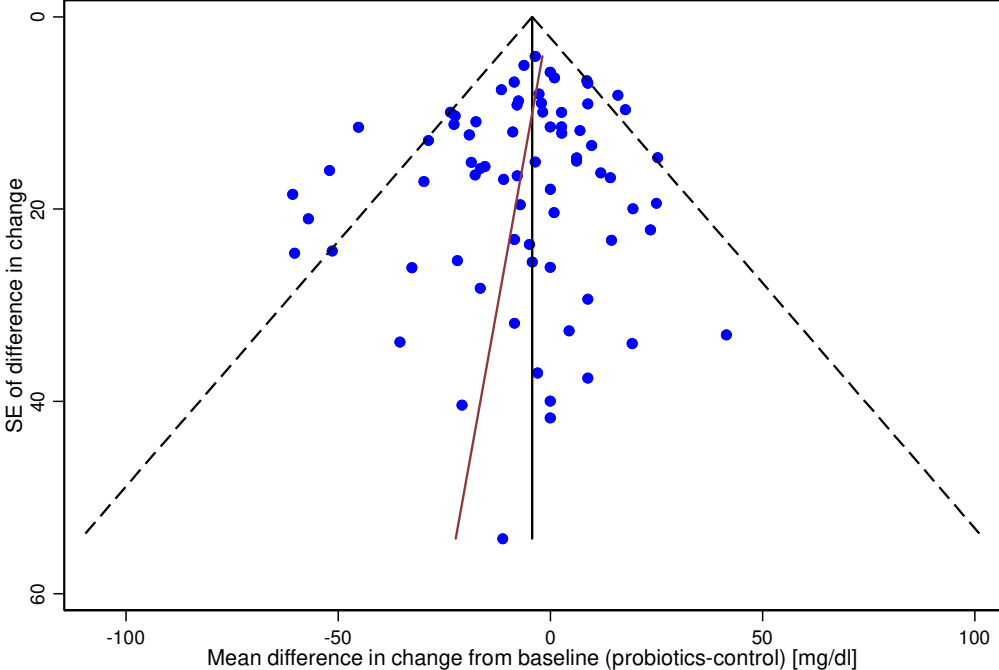

Supplementary Figure 46 Galbraith's plot for small study effects, triglycerides.

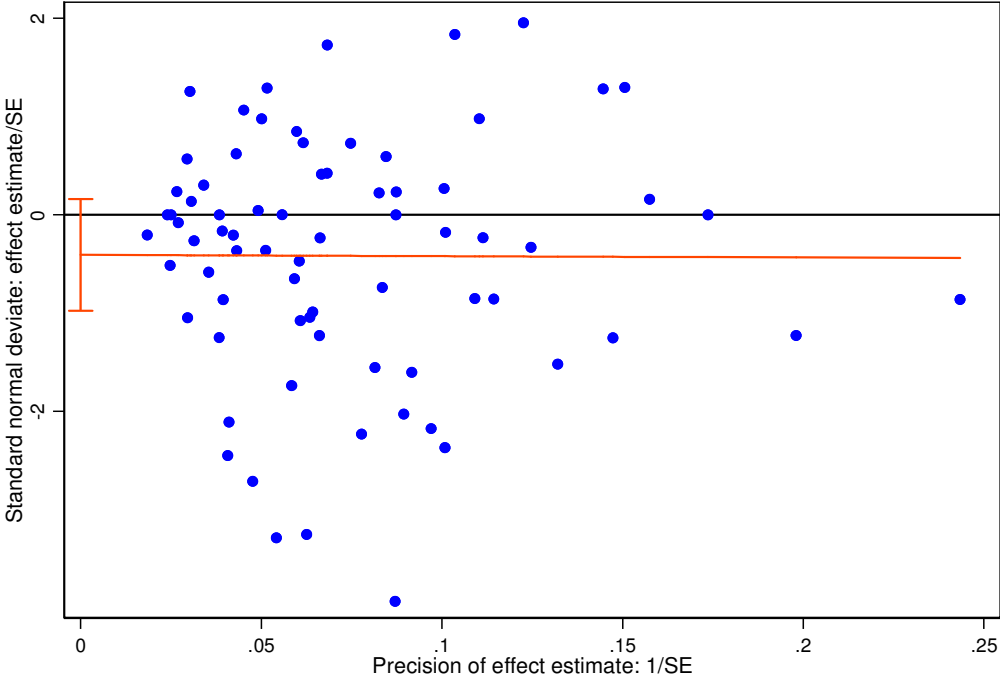

Legend Figure 46:

Hypothesis tests for small study effects: Egger's test: bias coefficient=-0.41, P=0.157. Begg's test: adj. Kendall's score=-177, P=0.409.



# Supplementary Figure 47 Overall estimate of probiotics effect on triglycerides.

Studies: 74, N=4461, Pop: PO:all subjects, Food: all, Genus: all, Strain: all, Dose: all

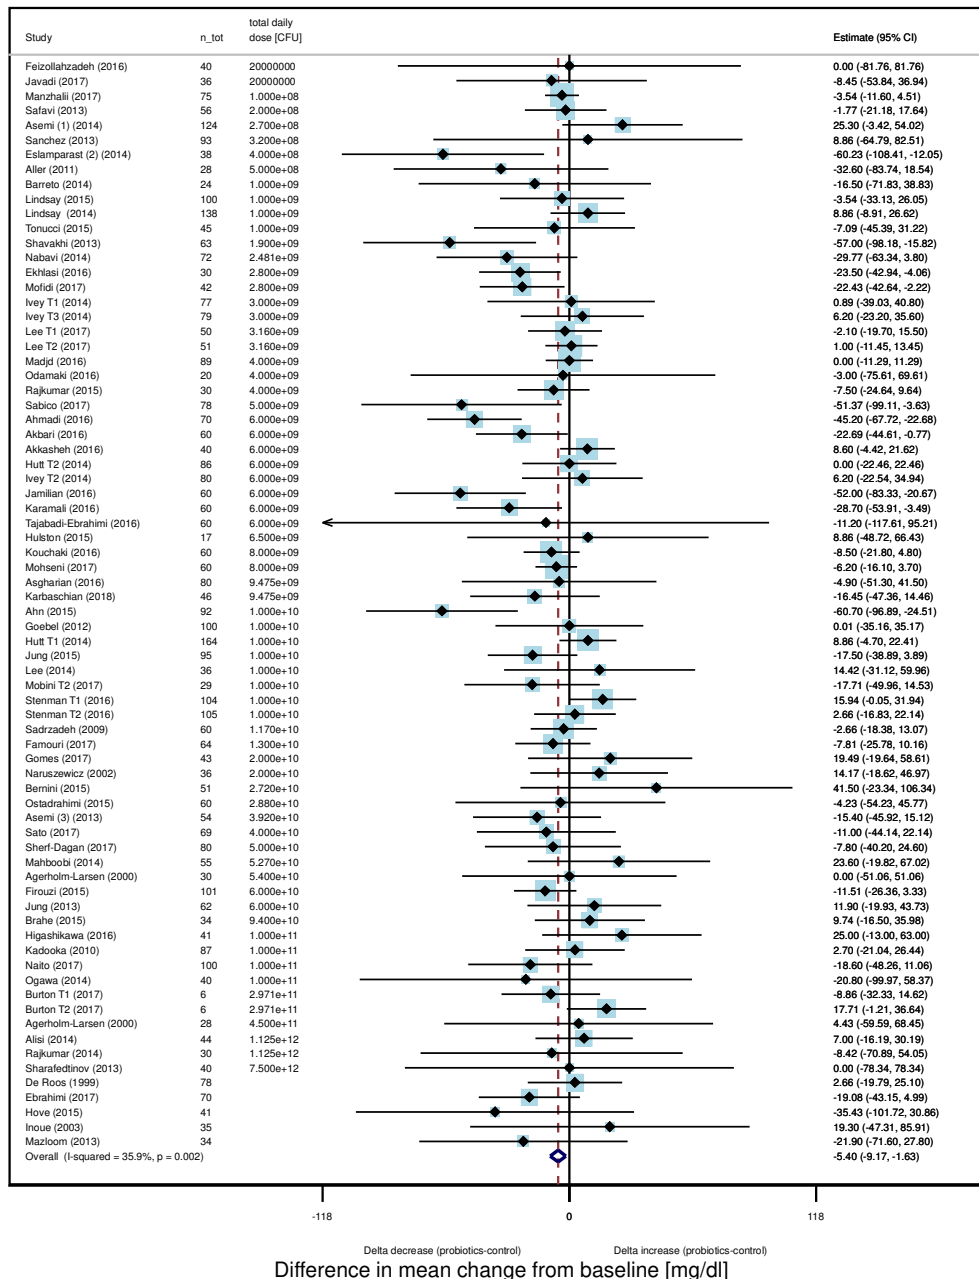

Supplementary Figure 48 Funnel plot, alanine aminotransferase.

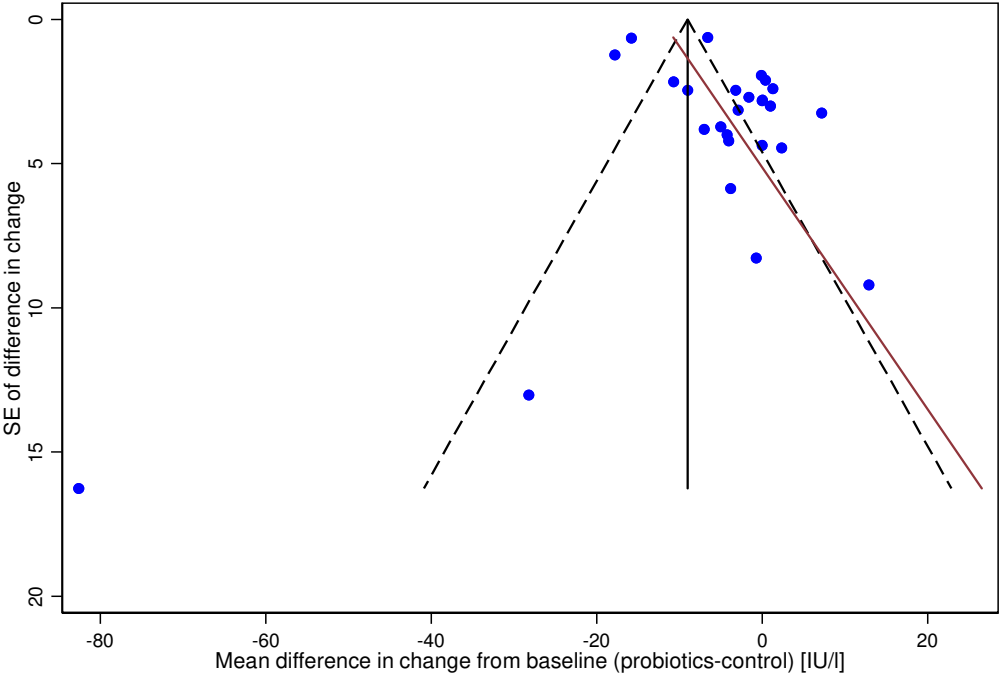

Supplementary Figure 49 Galbraith's plot for small study effects, alanine aminotransferase.

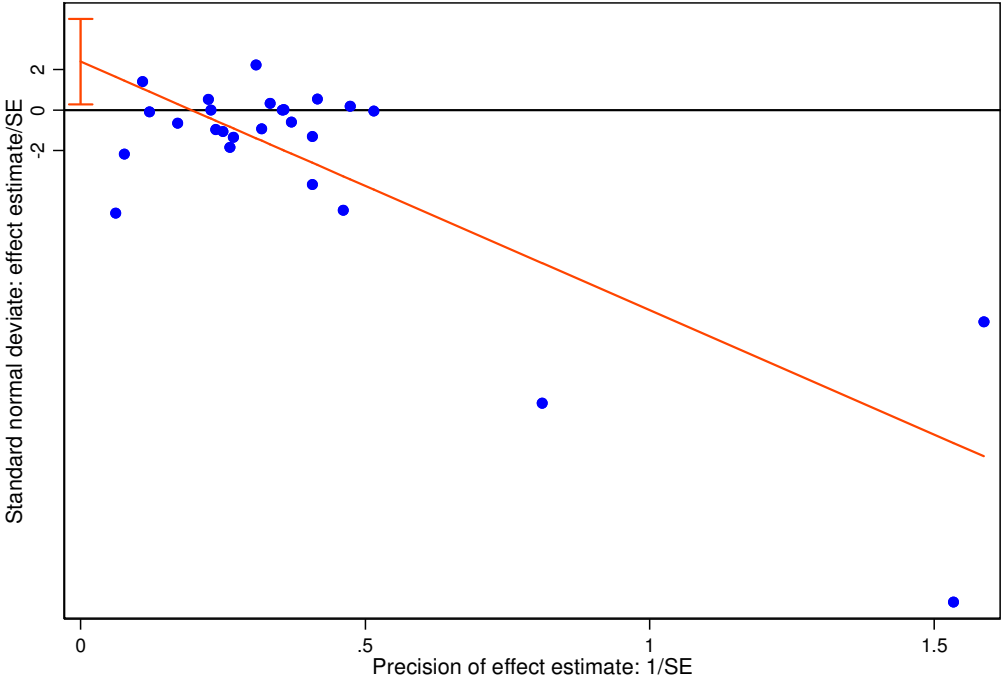

Legend Figure 49:

Hypothesis tests for small study effects: Egger's test: bias coefficient=2.39, P=0.028. Begg's test: adj. Kendall's score=-72, P=0.112. Filled & trim meta analysis estimator: -6.28 (95%CI: -9.16 to -3.40), P<0.001, 5 studies filled.

### Supplementary Figure 50 Overall estimate of probiotics effect on alanine aminotransferase.

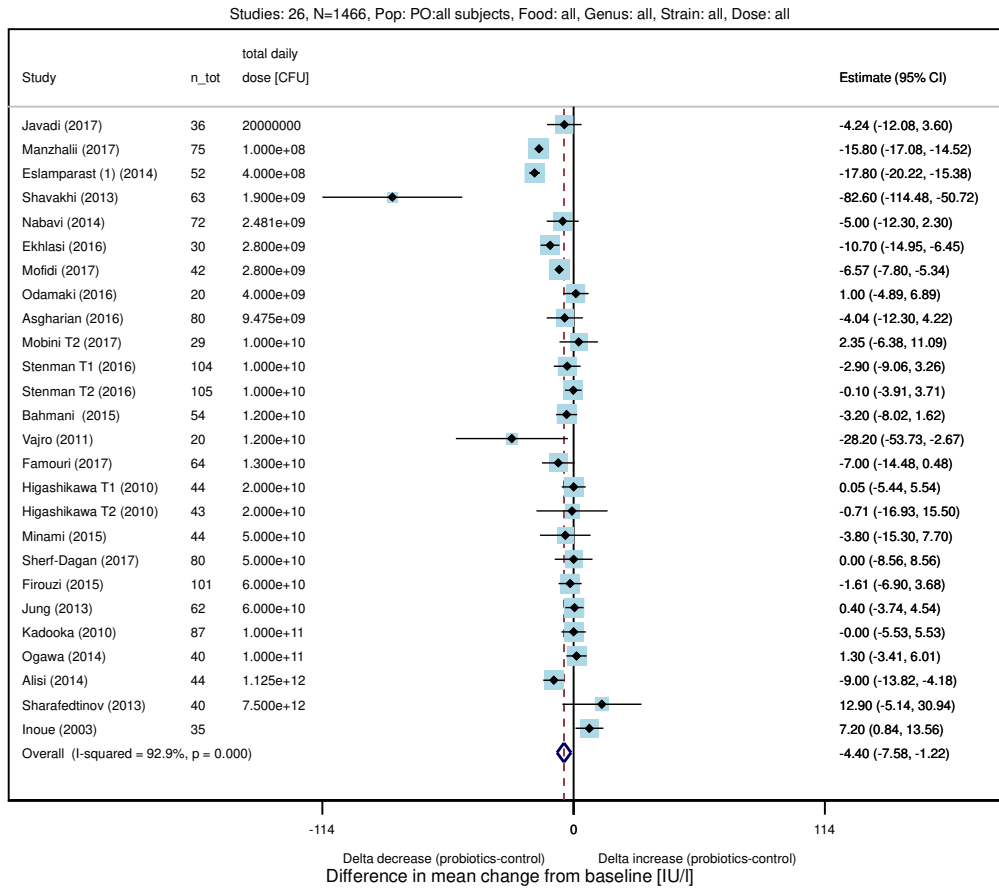

Supplementary Figure 51 Funnel plot, aspartate aminotransferase.

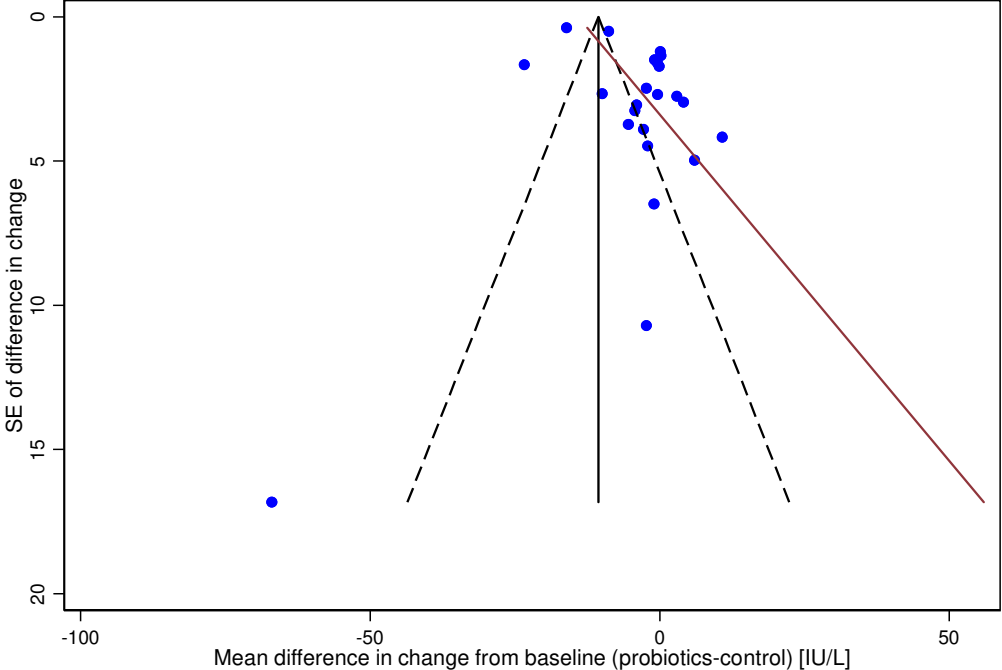

Supplementary Figure 52 Galbraith's plot for small study effects, aspartate aminotransferase.

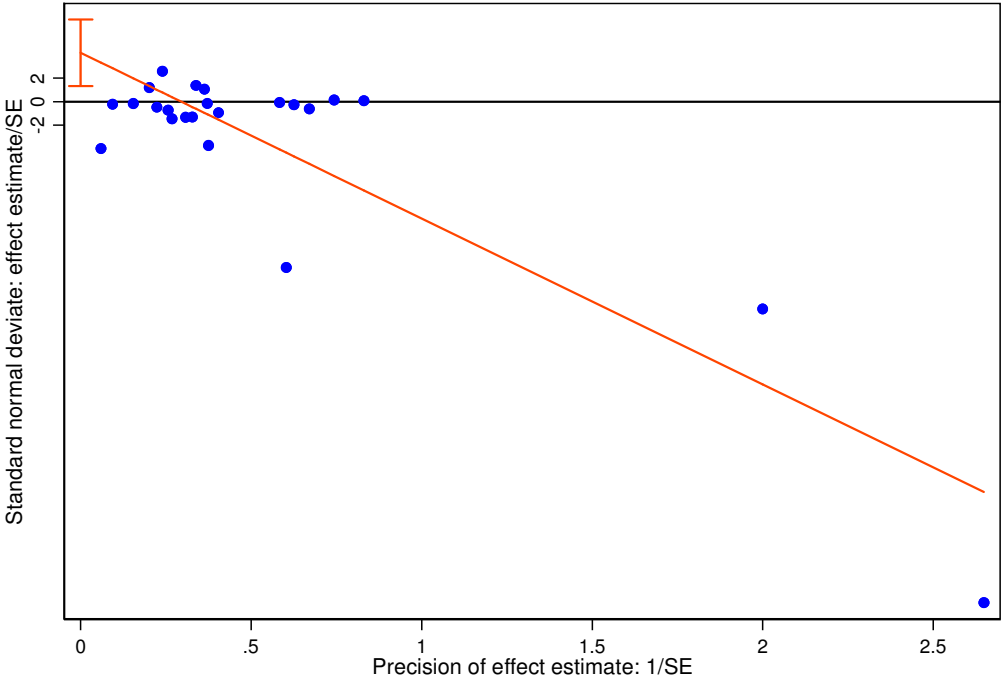

Legend Figure 52:

Hypothesis tests for small study effects: Egger's test: bias coefficient=-4.17, P=0.006. Begg's test: adj. Kendall's score=-91, P=0.016. Filled & trim meta analysis estimators: -5.99 (95%CI: -9.12 to -2.87), P<0.001, 5 studies filled.

### Supplementary Figure 53 Overall estimate of probiotics effect on aspartate aminotransferase.

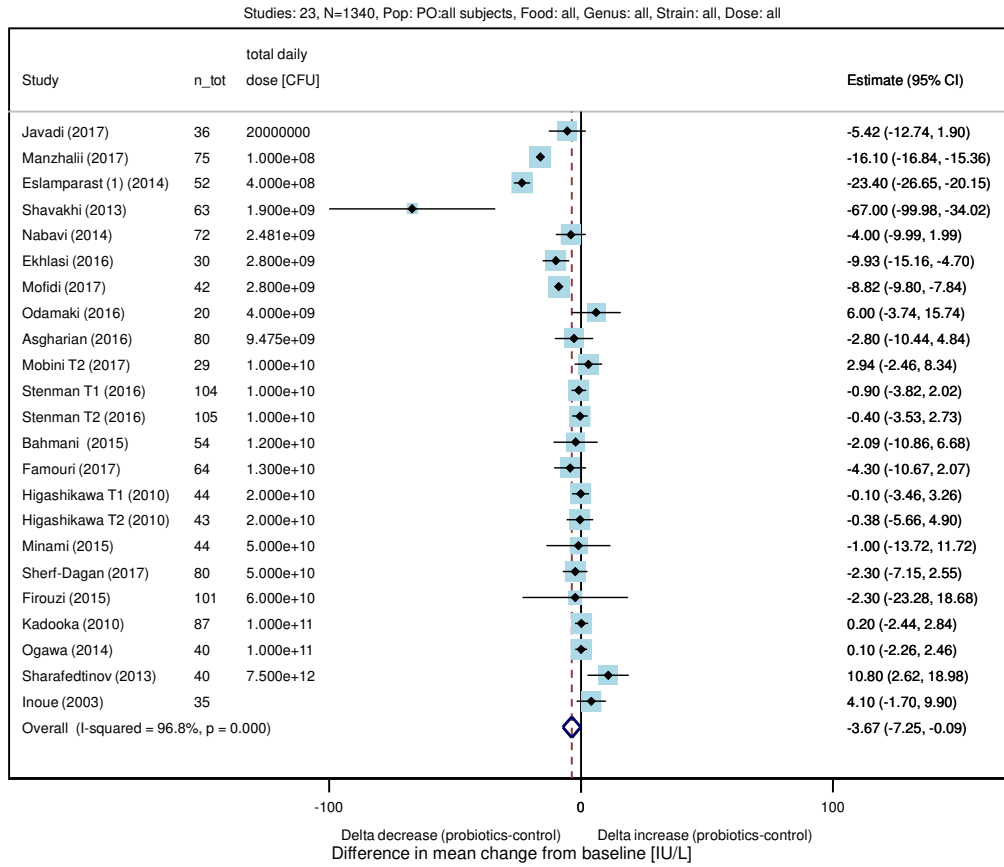

Supplementary Figure 54 Funnel plot, gamma-glutamyl aminotransferase.

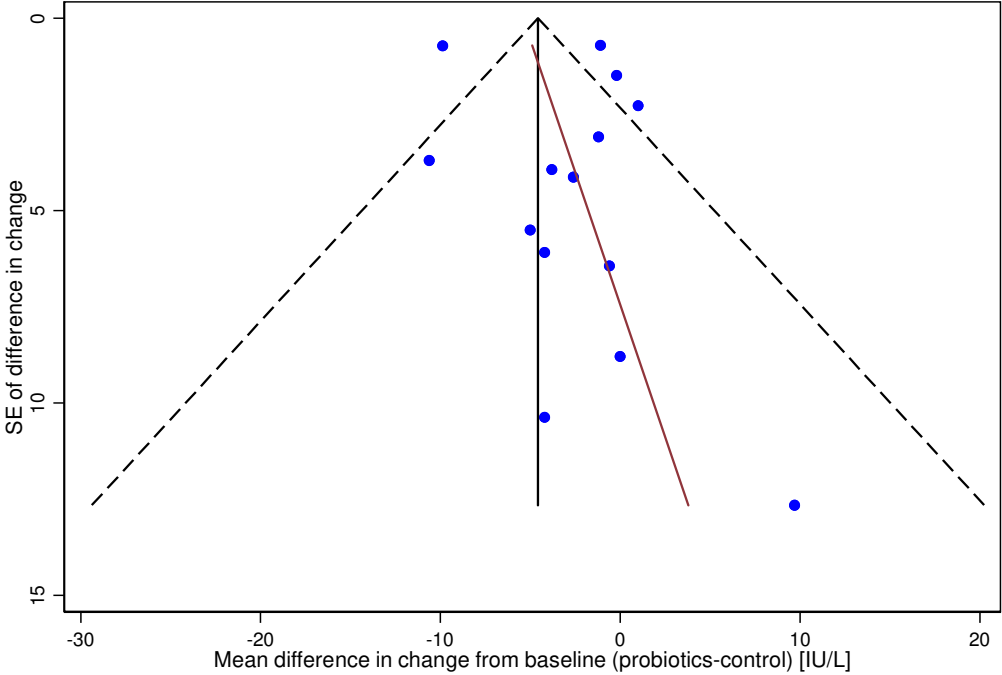



**Supplementary Figure 55 Galbraith's plot for small study effects, gamma-glutamyl aminotransferase.**

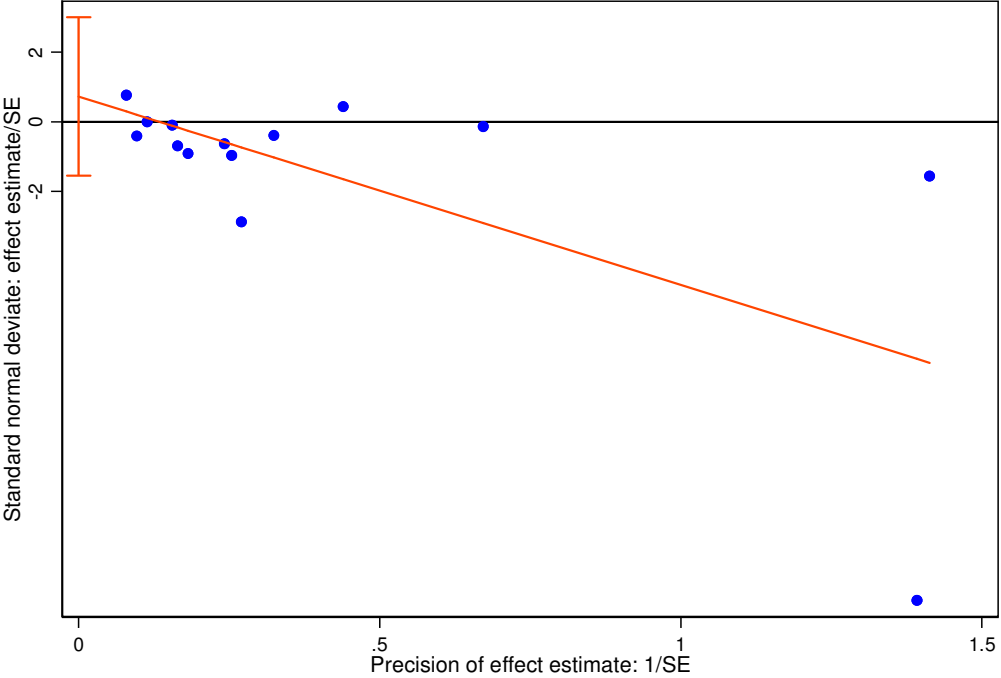

Legend Figure 55:

Hypothesis tests for small study effects: Egger's test: bias coefficient=0.73, P=0.500. Begg's test: adj. Kendall's score=-13, P=0.477.



# Supplementary Figure 57 Estimate of probiotics effect on triglycerides excluding studies conducted in Iran.

Studies: 47, N=2878, Pop: excl. studies from Iran, Food: all, Genus: all, Strain: all, Dose: all

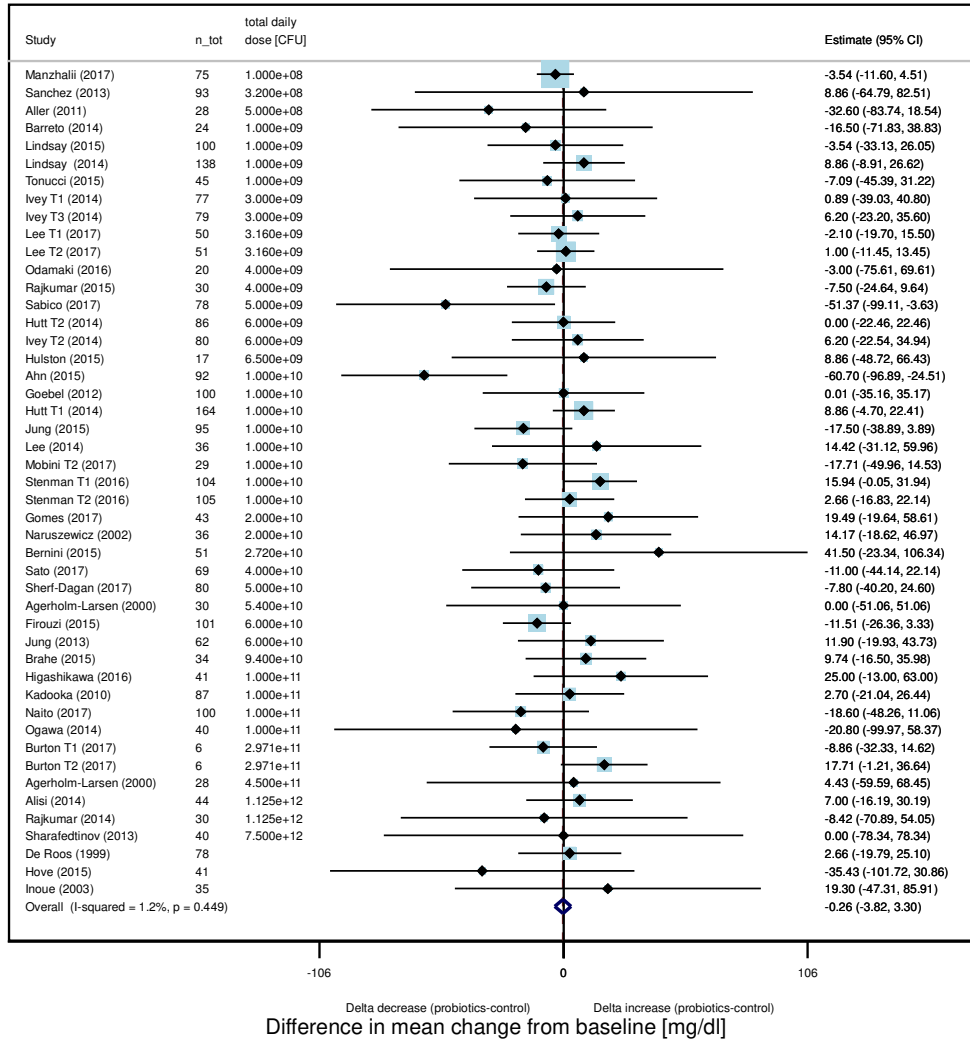

**Supplementary Figure 58 Estimate of probiotics effect on alanine aminotransferase excluding studies conducted in Iran.**

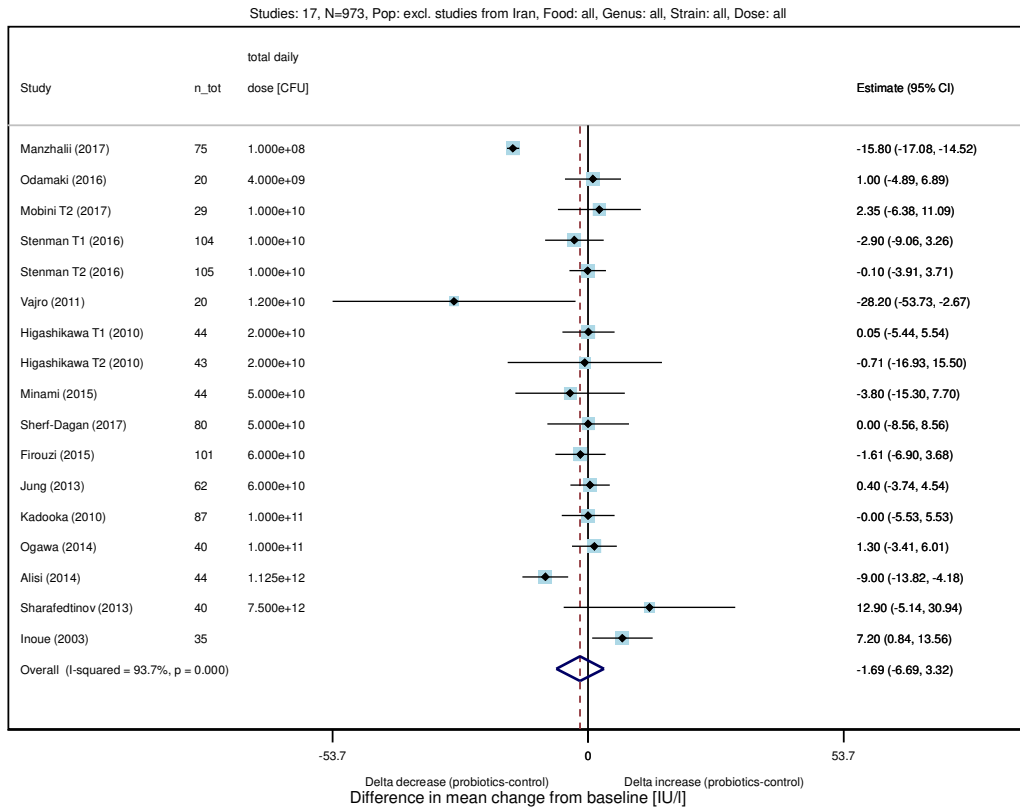

### Supplementary Figure 59 Estimate of probiotics effect on aspartate aminotransferase excluding studies conducted in Iran.

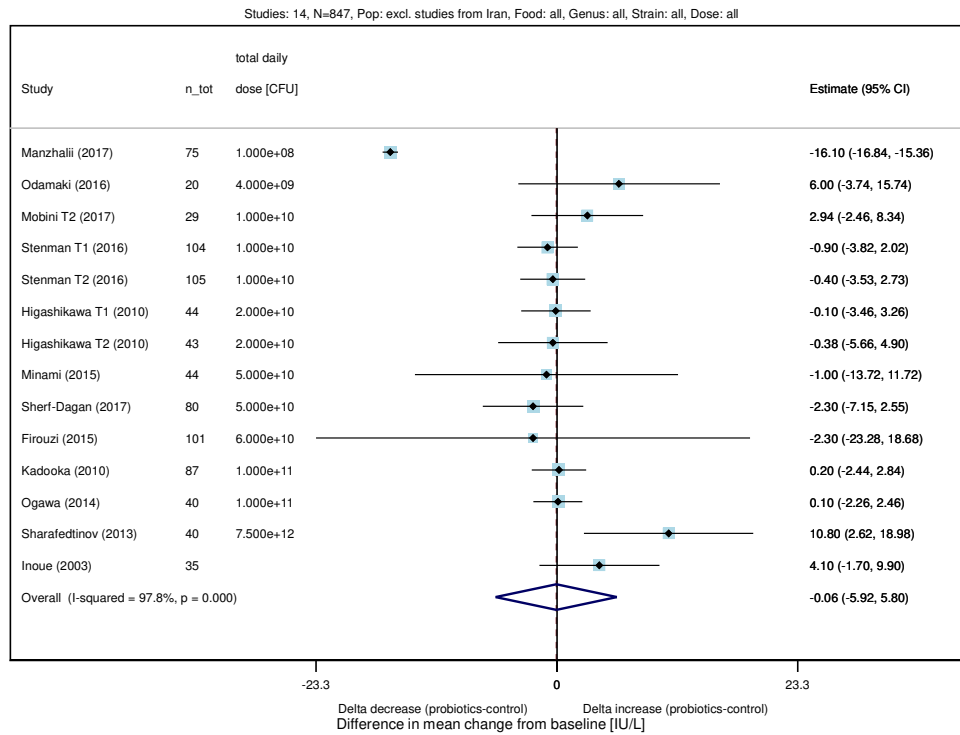

**Supplementary Figure 60 Estimate of probiotics effect on gamma-glutamyl aminotransferase excluding studies conducted in Iran.**

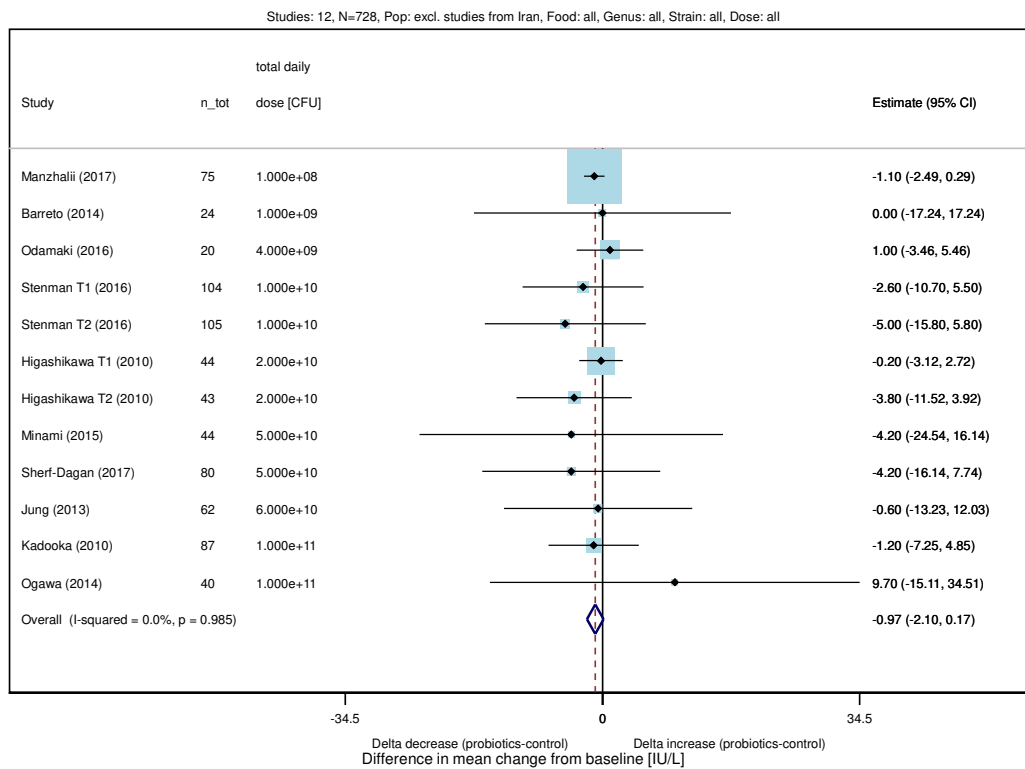

**Supplementary Figure 61 Estimate of probiotics effect on body weight. Subgroup analysis in normal weight subjects.**

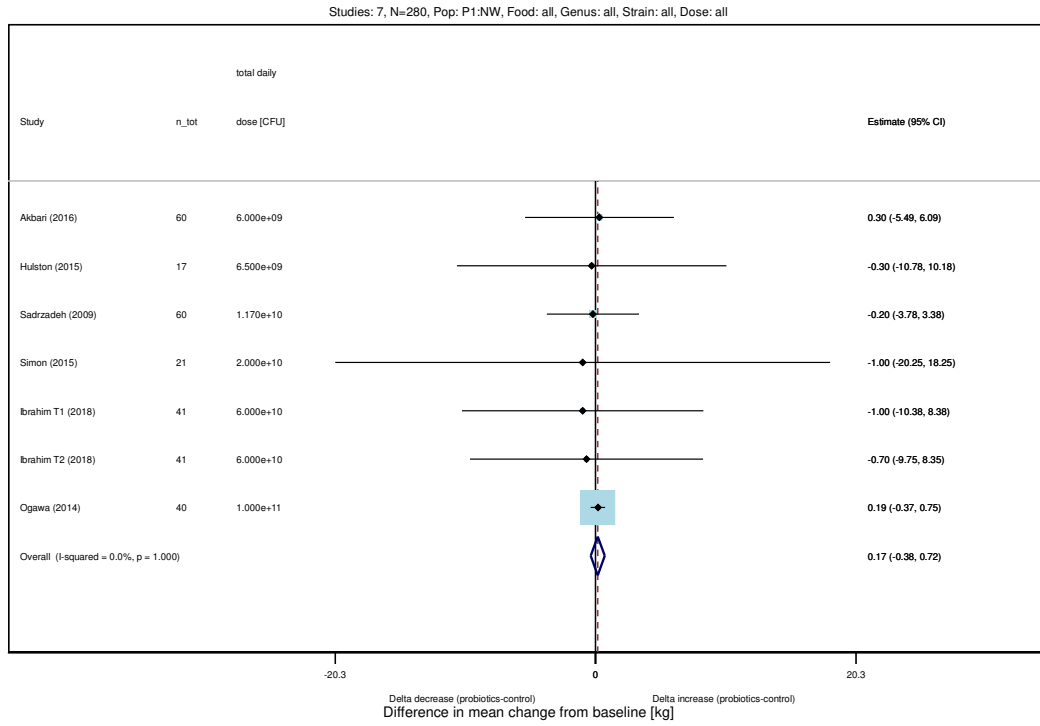





**Supplementary Figure 63 Estimate of probiotics effect on body weight. Subgroup analysis in obese subjects.**

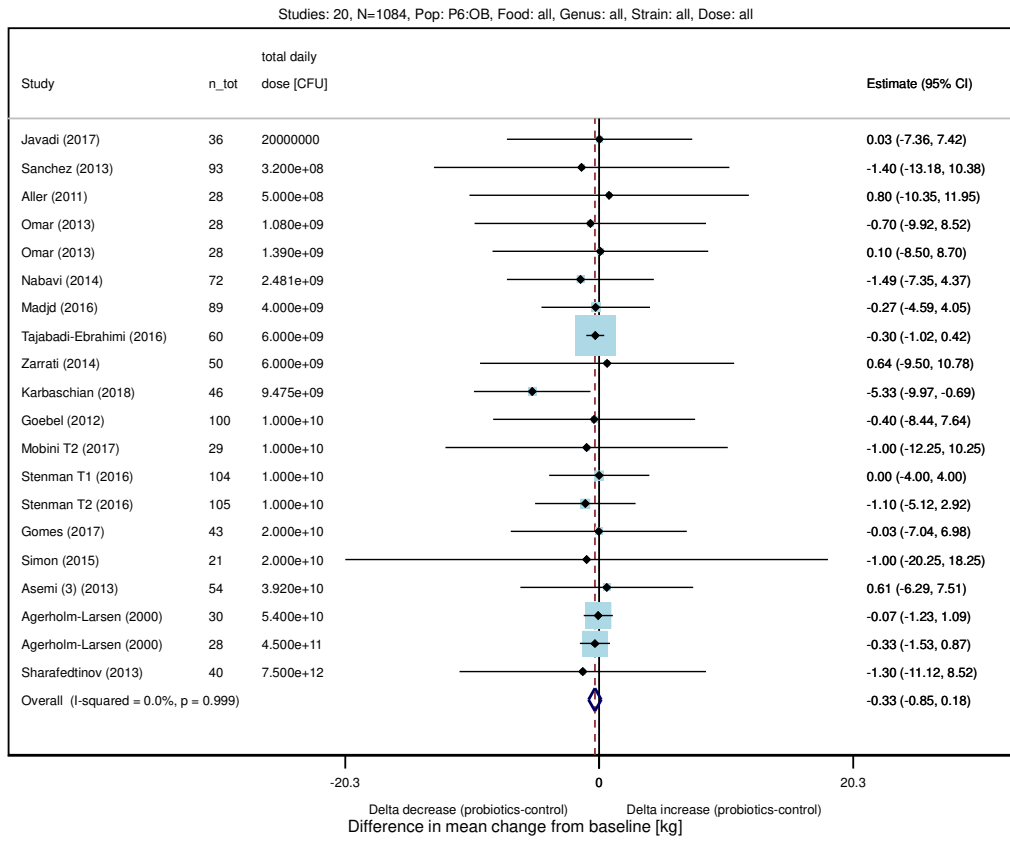

**Supplementary Figure 64 Estimate of probiotics effect on body mass index. Subgroup analysis in normal weight subjects.**

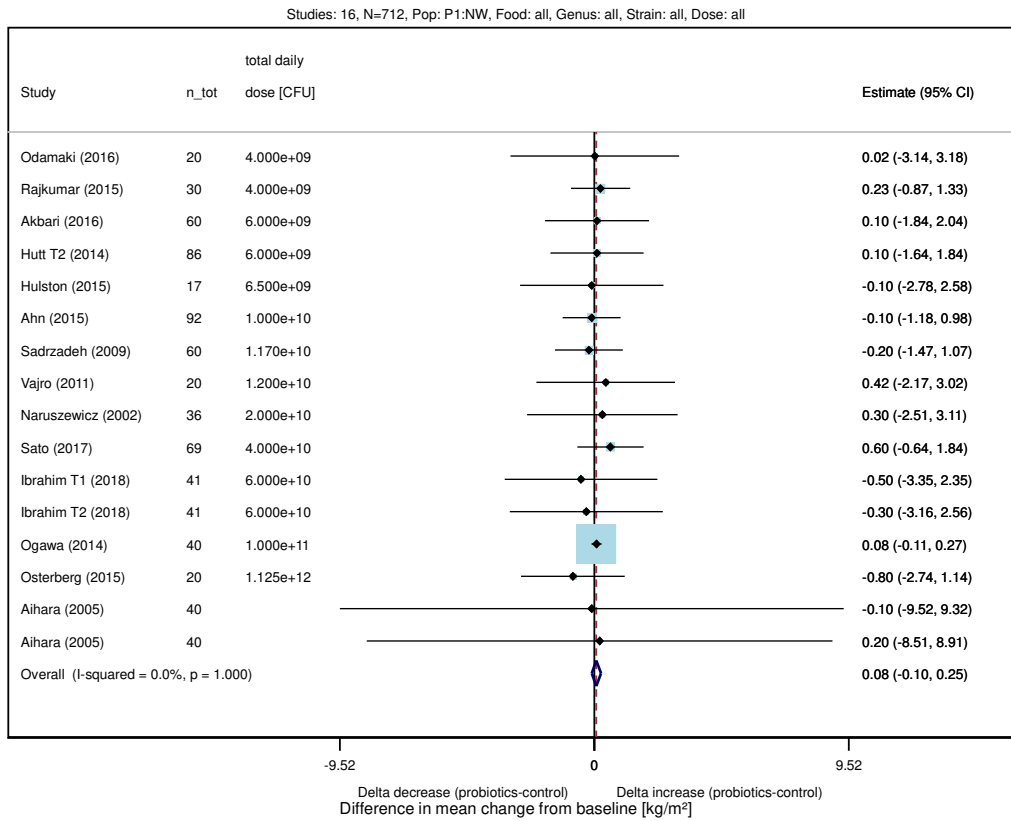





## Supplementary Figure 67 Estimate of probiotics effect on waist circumference. Subgroup analysis in overweight subjects.

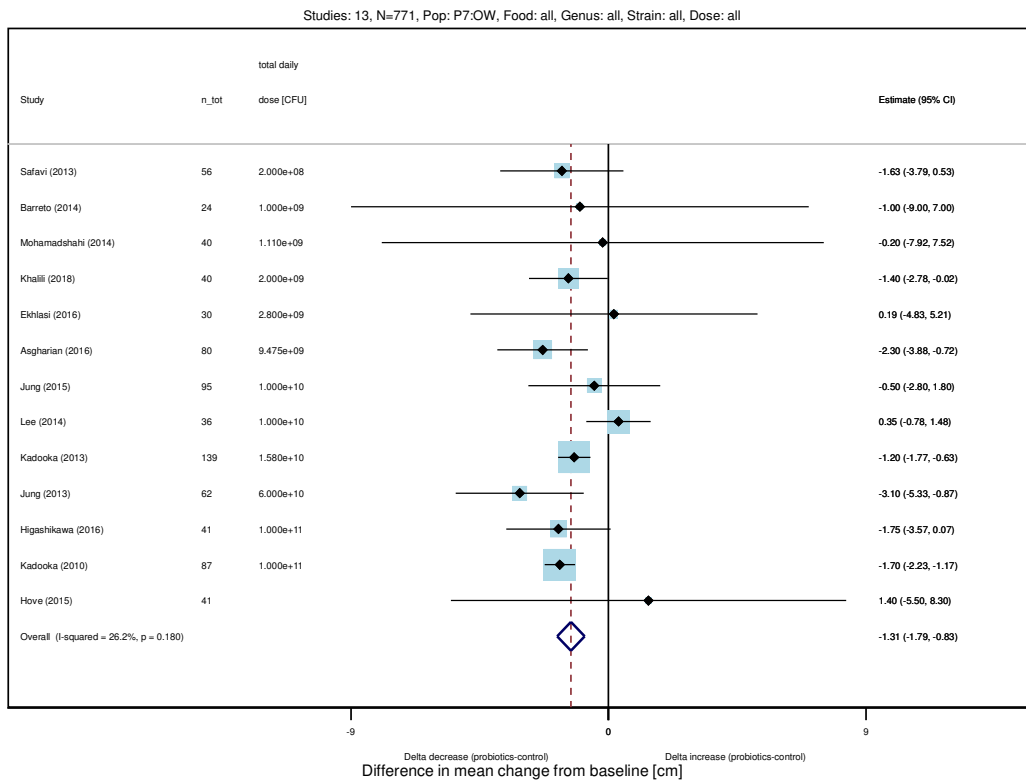

**Supplementary Figure 68 Estimate of probiotics effect on waist circumference. Subgroup analysis in obese subjects.**

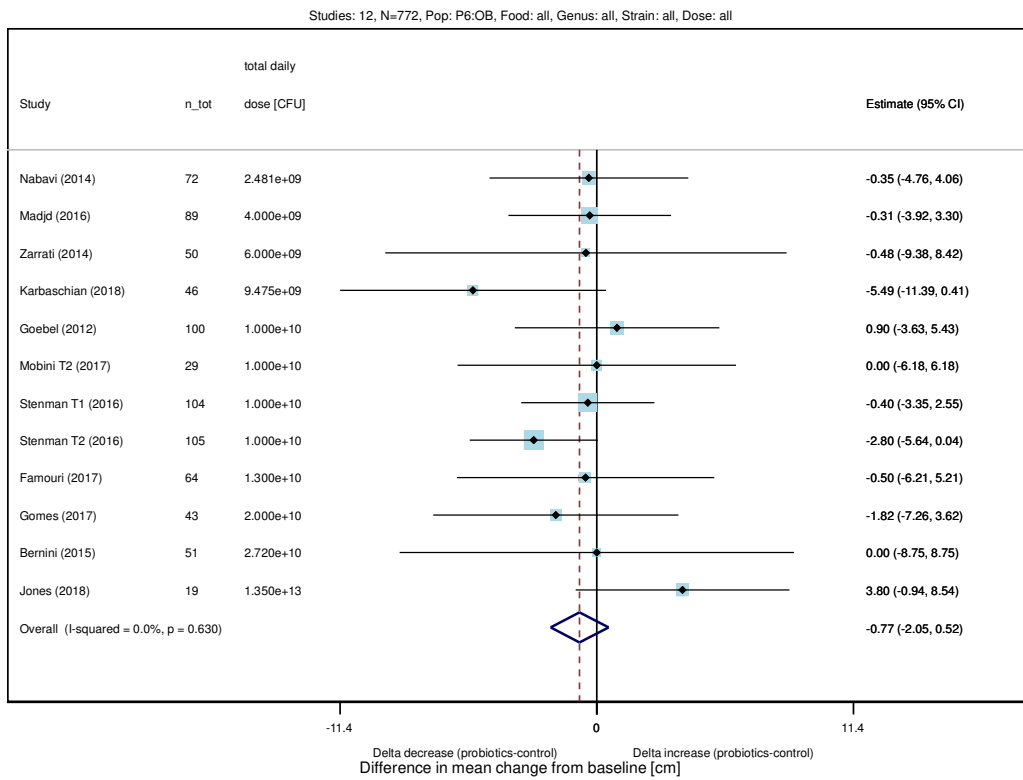

**Supplementary Figure 69 Estimate of probiotics effect on body fat mass. Subgroup analysis in normal weight subjects.**

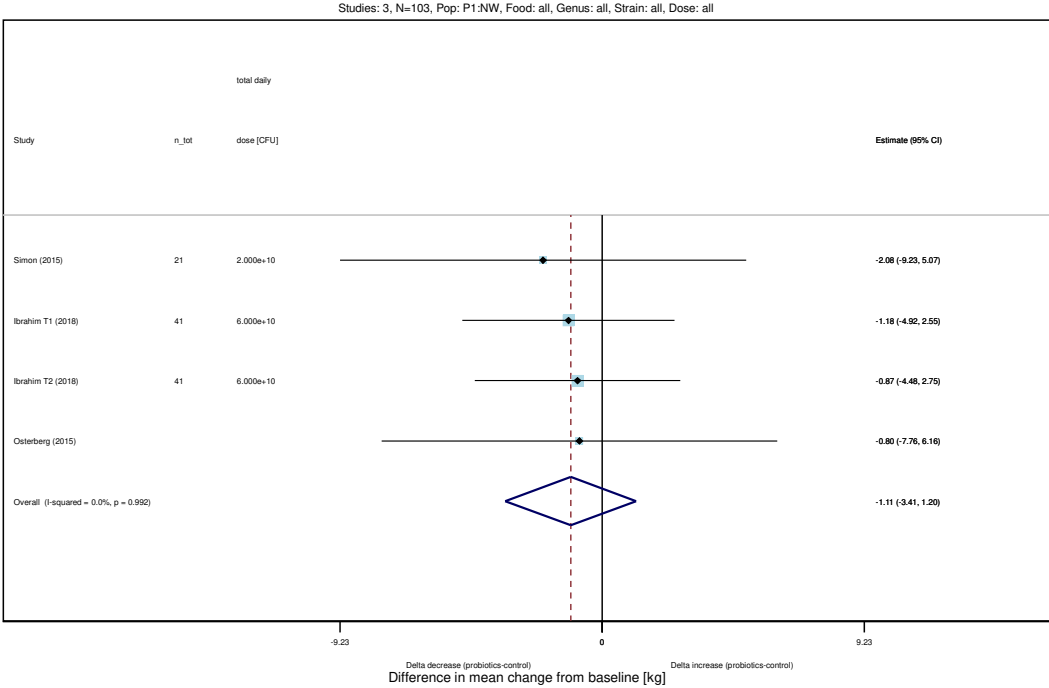

## Supplementary Figure 70 Estimate of probiotics on body fat mass. Subgroup analysis in overweight subjects.

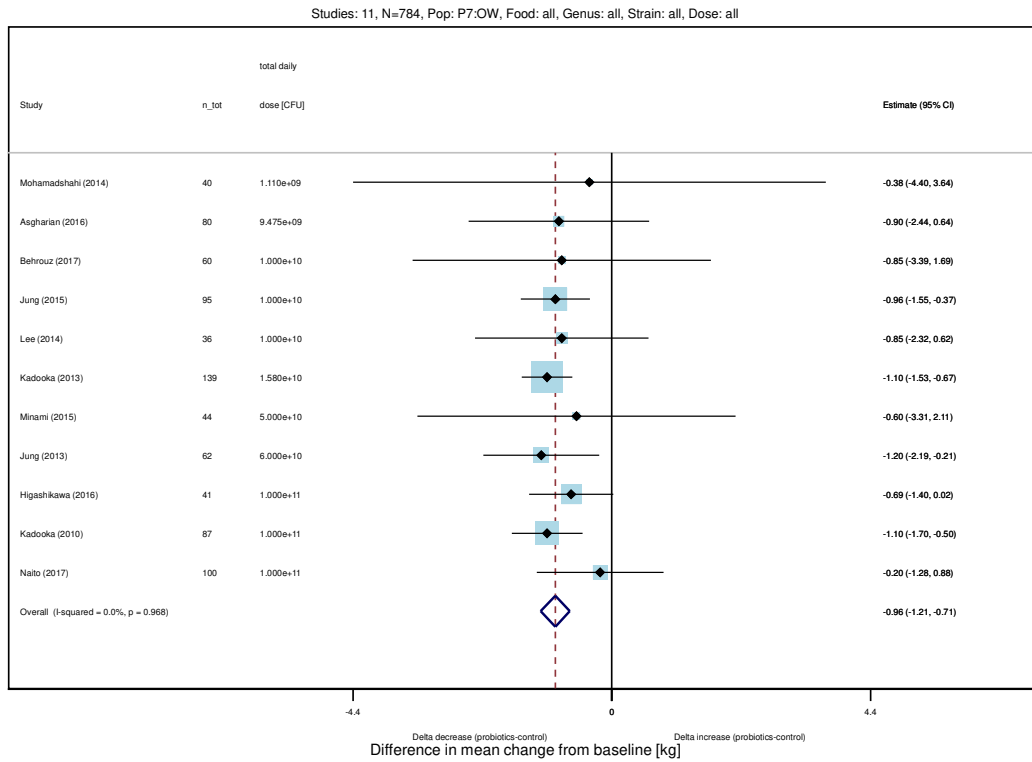





**Supplementary Figure 72 Estimate of probiotics on fasting glucose. Subgroup analysis in impaired fasting glucose subjects.**

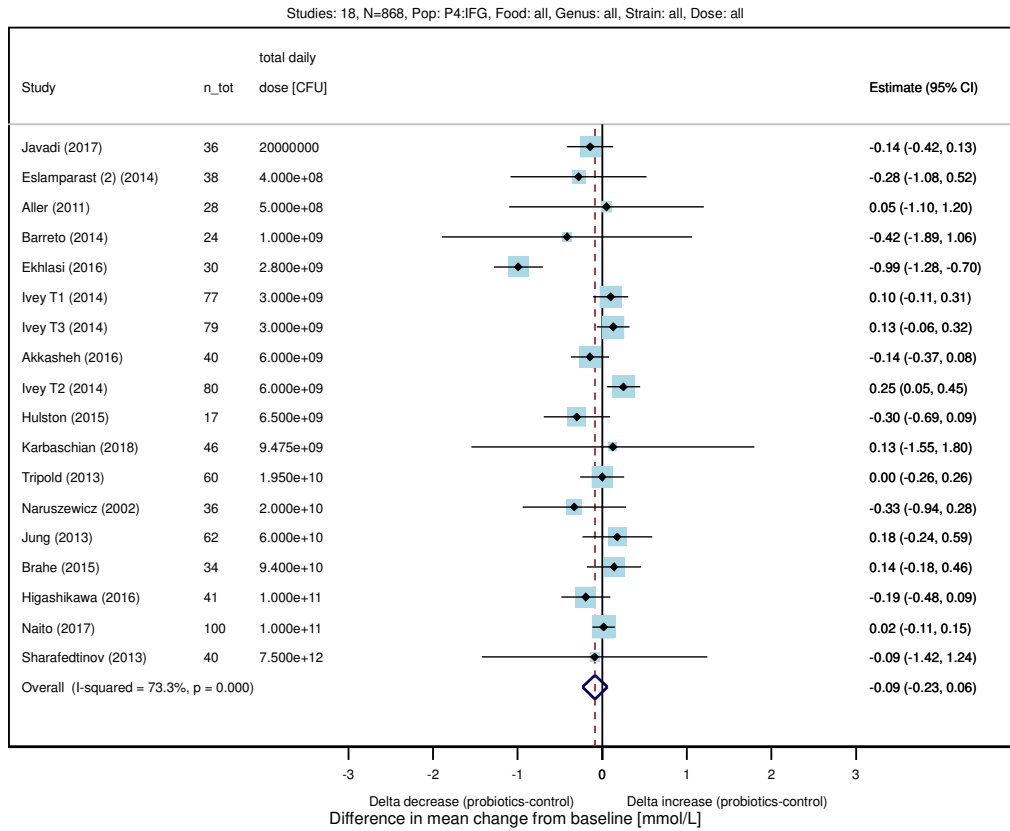

**Supplementary Figure 73 Estimate of probiotics on fasting glucose. Subgroup analysis in type 2 diabetes mellitus subjects.**

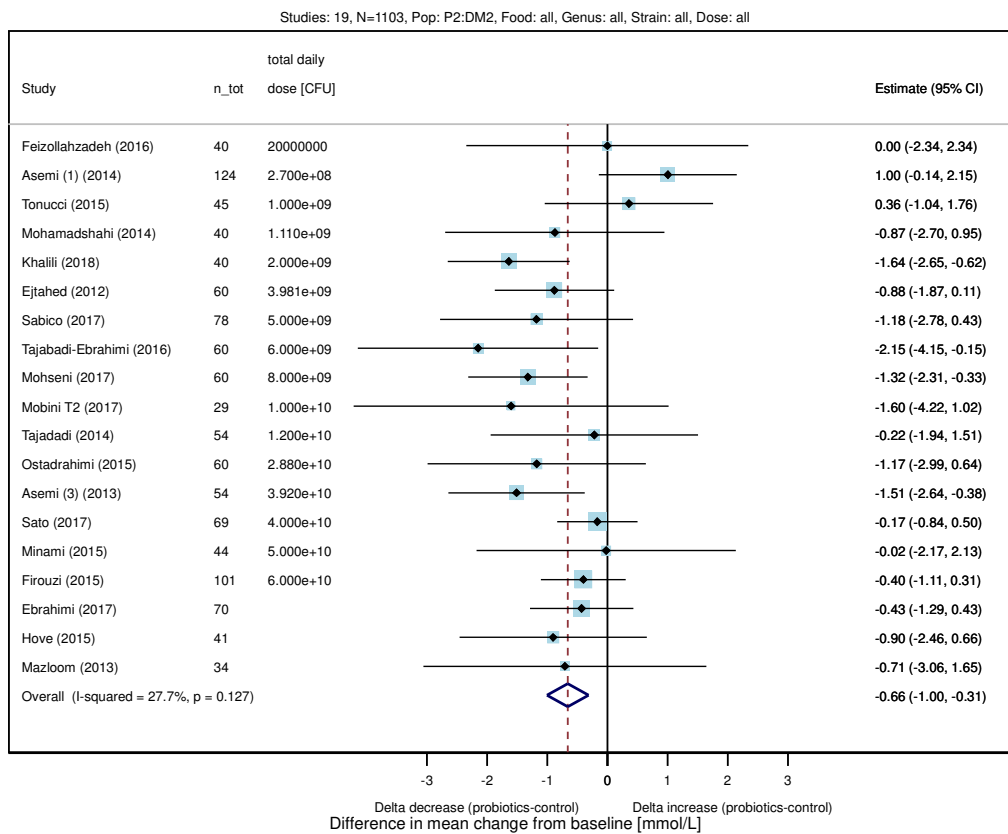

**Supplementary Figure 74 Estimate of probiotics on fasting glucose.  
Subgroup analysis in gestational diabetes mellitus.**

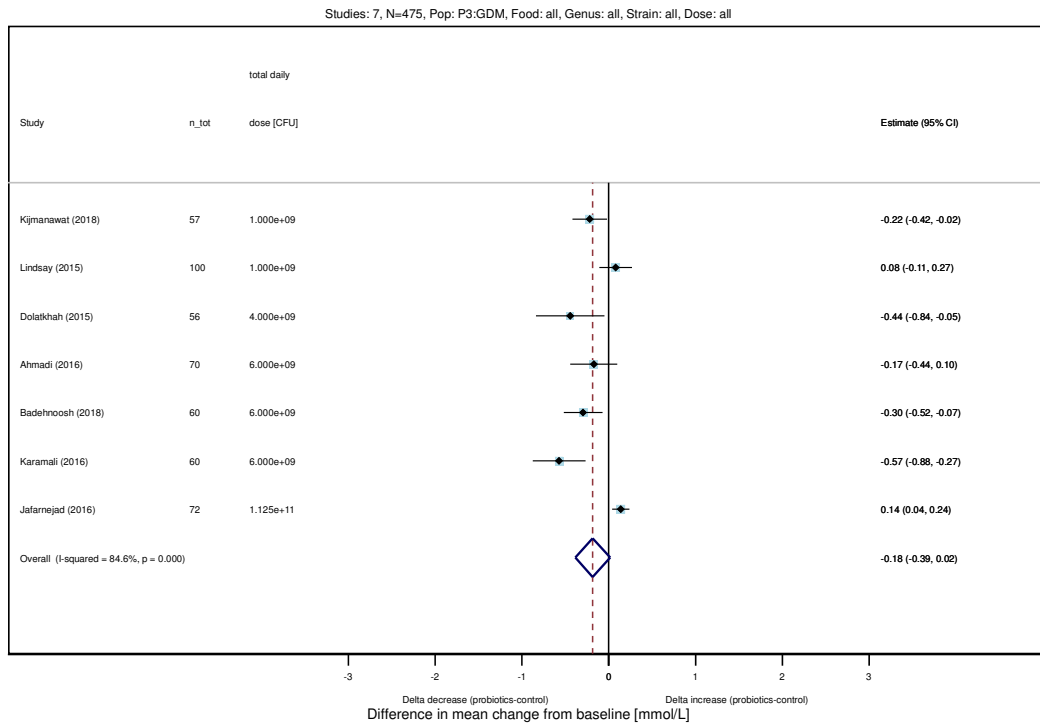

## Supplementary Figure 75 Estimate of probiotics effect on glycated haemoglobin. Subgroup analysis in impaired fasting glucose.

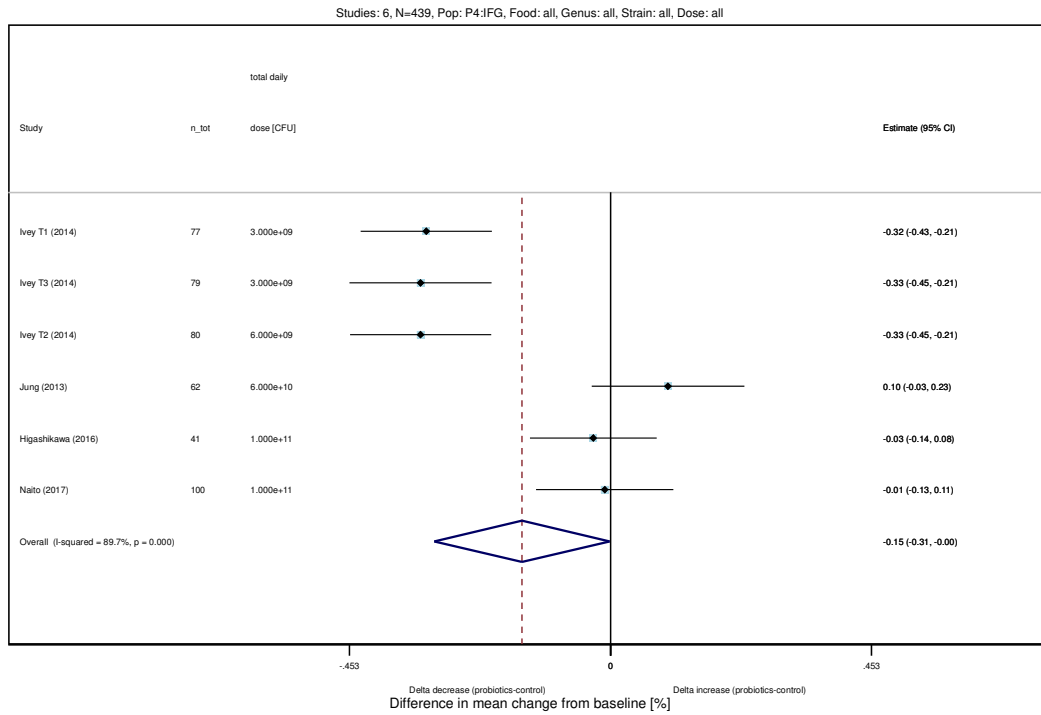

**Supplementary Figure 76 Estimate of probiotics effect on glycated haemoglobin. Subgroup analysis in type 2 diabetes mellitus.**

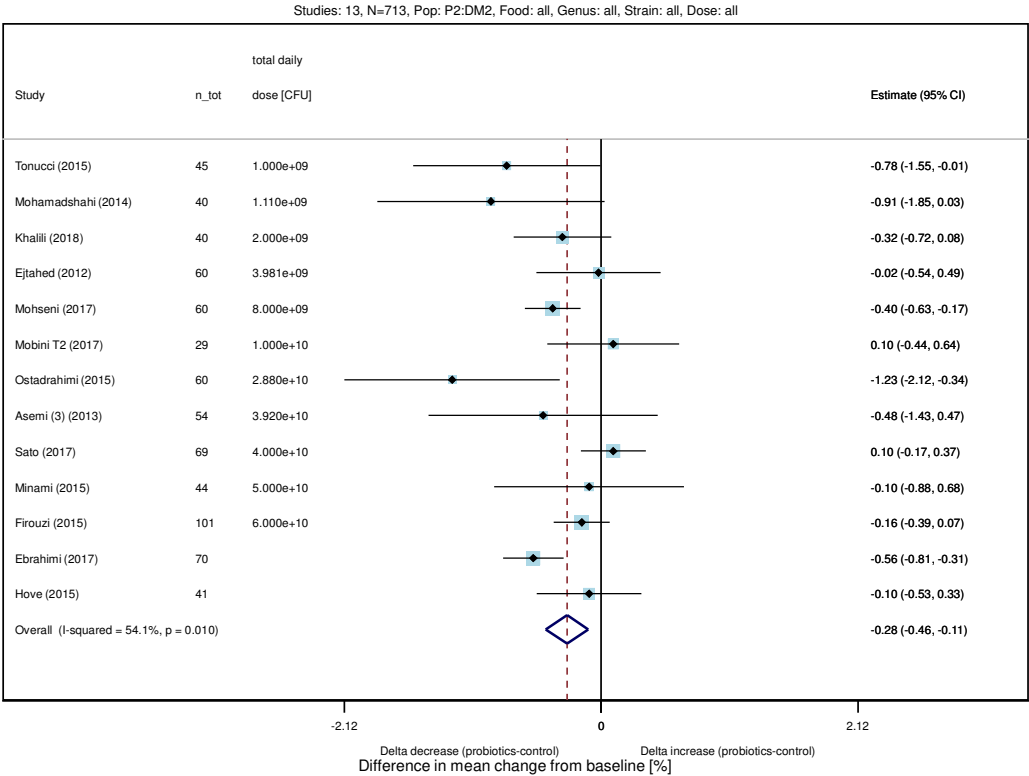

**Supplementary Figure 77 Estimate of probiotics effect on fasting insulin. Subgroup analysis in impaired fasting glucose subjects.**

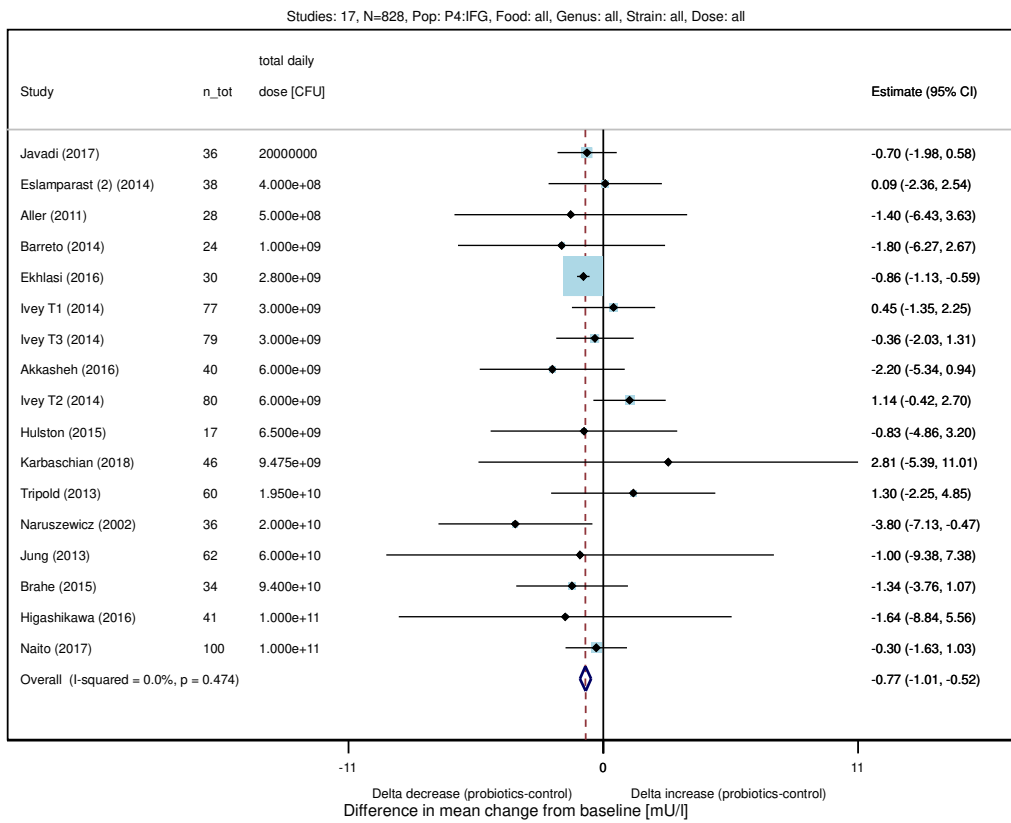

**Supplementary Figure 78 Estimate of probiotics effect on fasting insulin. Subgroup analysis in type 2 diabetes mellitus subjects.**

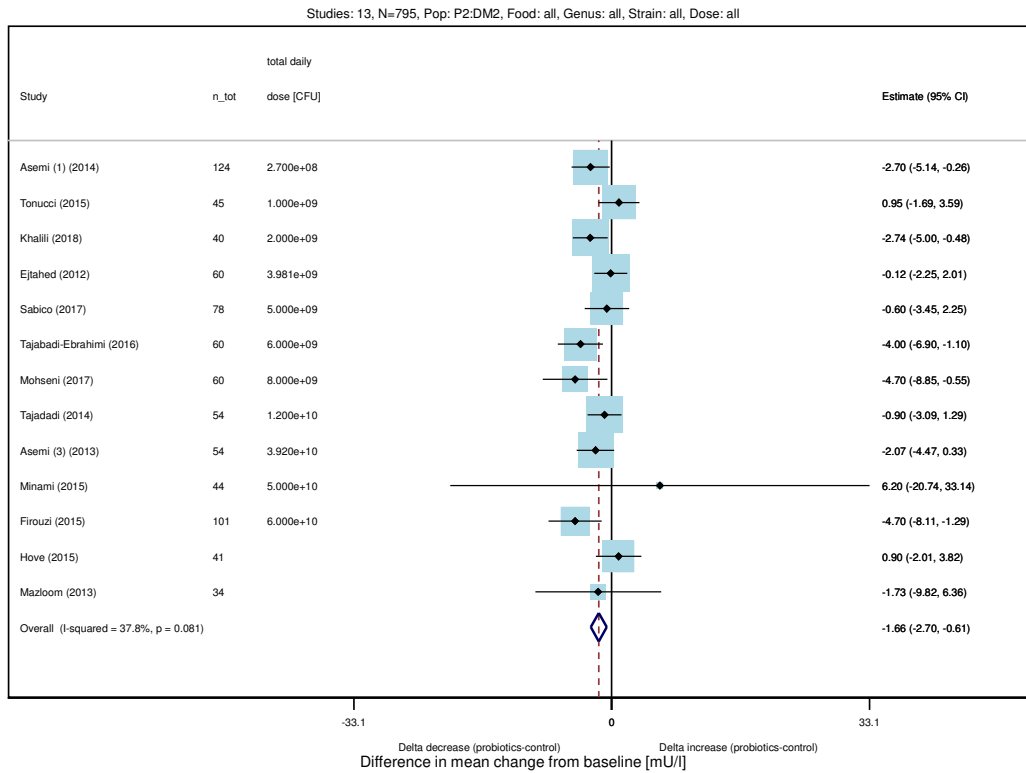



**Supplementary Figure 79 Estimate of probiotics effect on fasting insulin. Subgroup analysis in gestational diabetes mellitus.**

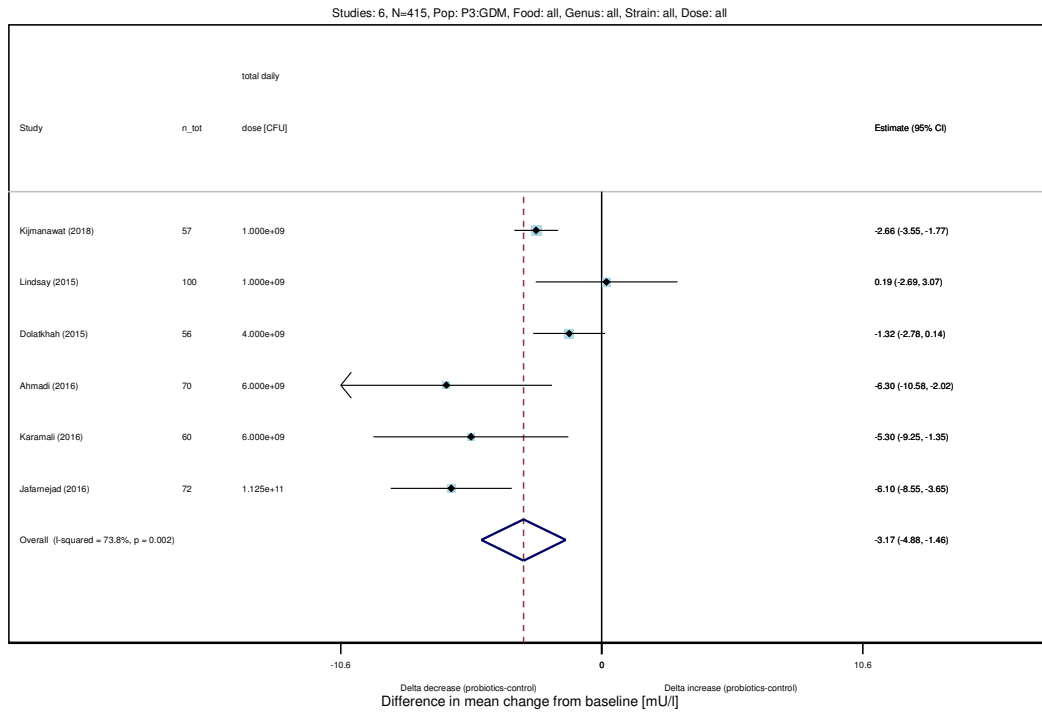

**Supplementary Figure 80 Estimate of probiotics effect on homeostasis model of insulin resistance. Subgroup analysis in impaired fasting glucose subjects.**

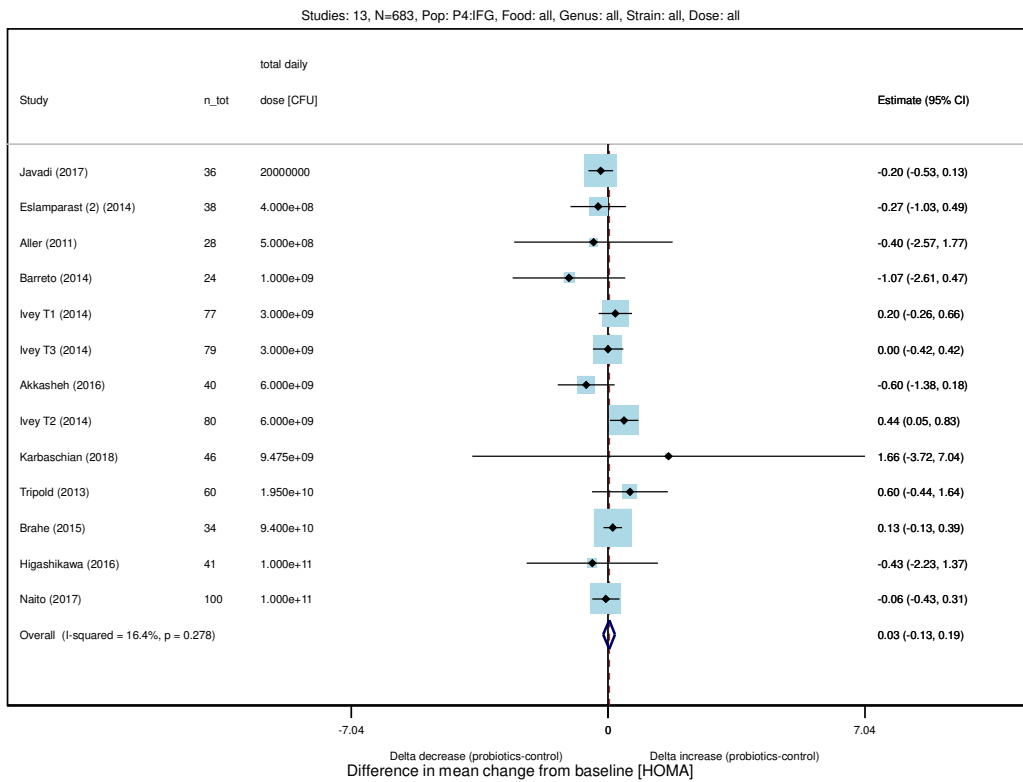

**Supplementary Figure 81 Estimate of probiotics effect on homeostasis model of insulin resistance. Subgroup analysis in type 2 diabetes mellitus subjects.**

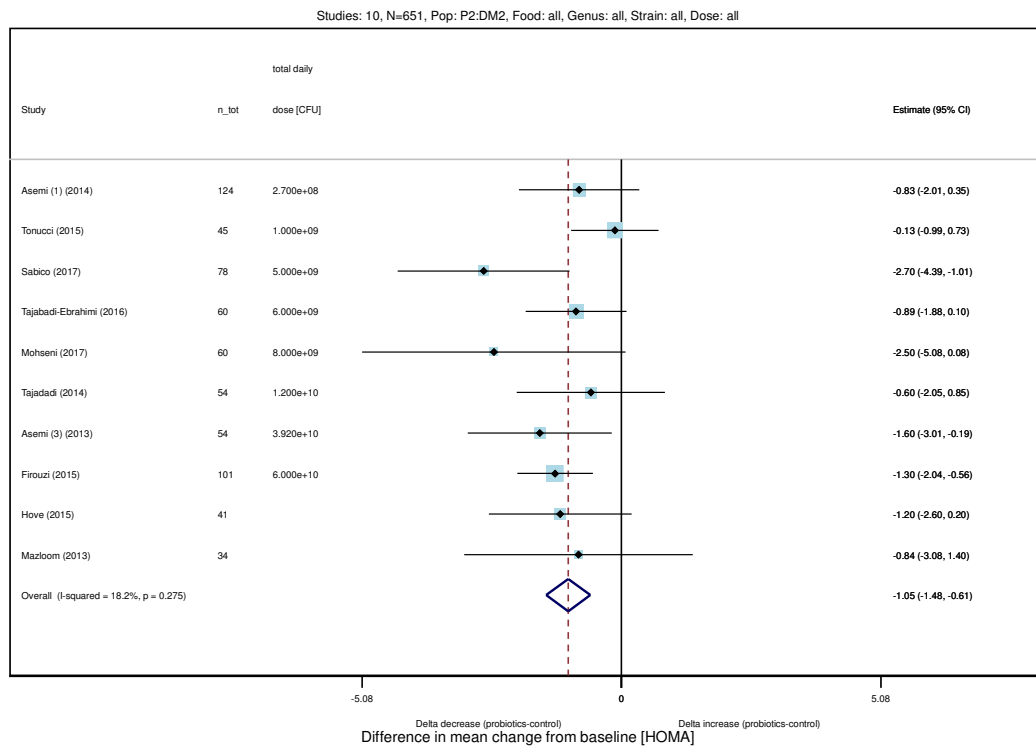

**Supplementary Figure 82 Estimate of probiotics effect on homeostasis model of insulin resistance. Subgroup analysis in gestational diabetes mellitus subjects.**

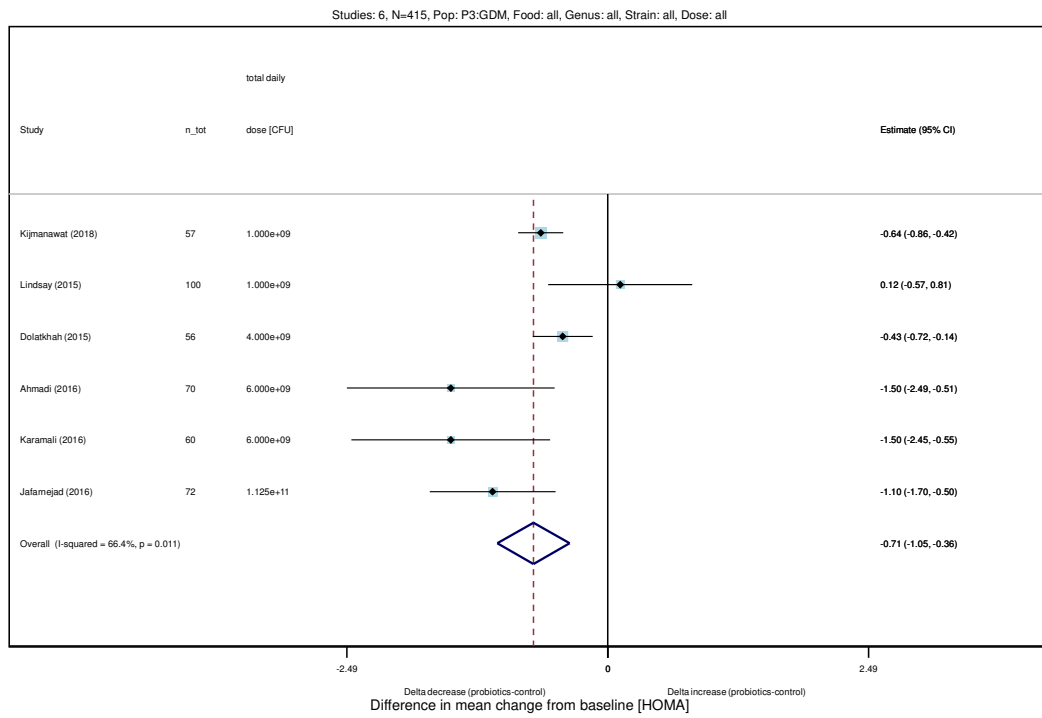

## Supplementary Figure 83 Estimate of probiotics effect on alanine aminotransferase Subgroup analysis in non-alcoholic fatty liver disease subjects.

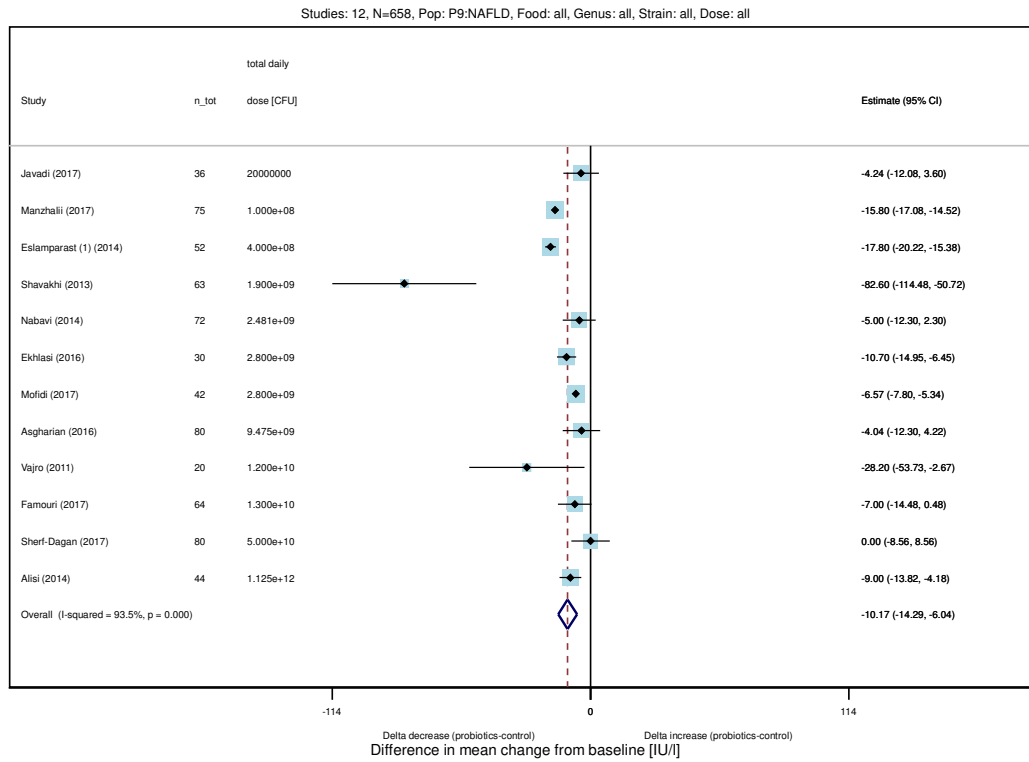

**Supplementary Figure 84 Estimate of probiotics on aspartate aminotransferase. Subgroup analysis in non-alcoholic fatty liver disease subjects.**

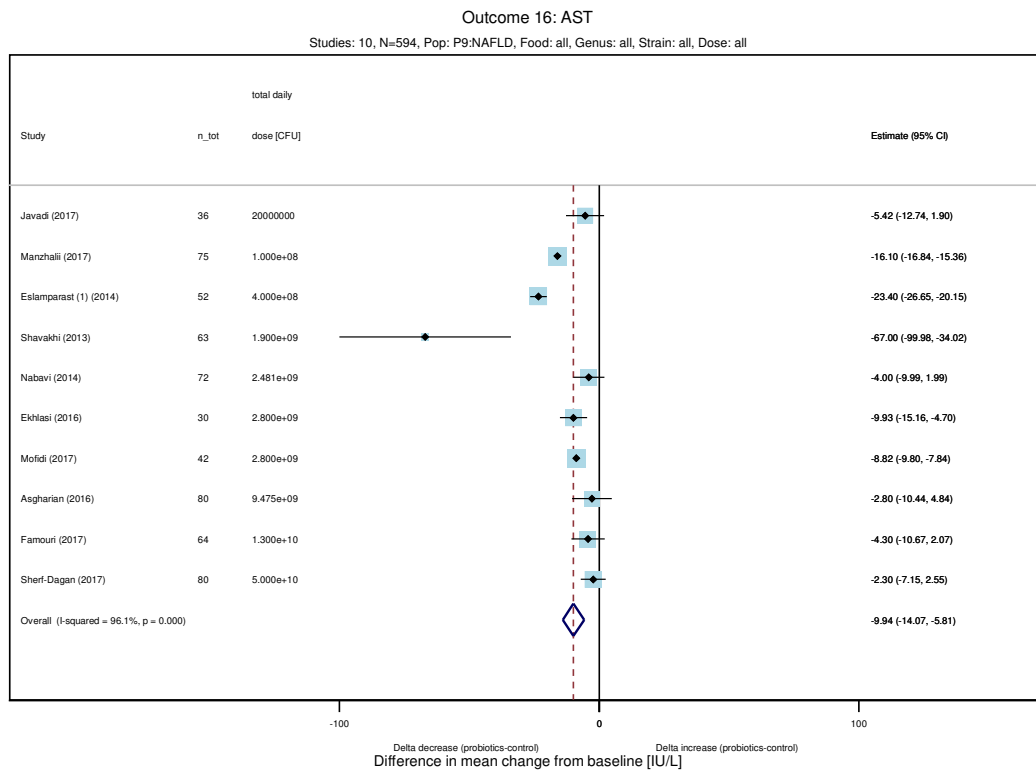

Supplement: inline-supplementary-material-1 [file inline-supplementary-material-1.pdf]
